# Supplementary material for: Defining the characteristics of interferon-alpha–stimulated human genes: insight from expression data and machine learning
Source: PubMed Central journal article supplement (PMC9673497; doi:10.1093/gigascience/giac103), 2022-11-18
Supplement: giac103_giga-d-22-00042_original_submission.pdf [file giac103_giga-d-22-00042_original_submission.pdf]

# GigaScience

## Defining the characteristics of interferon-alpha-stimulated human genes: insight from expression data and machine-learning --Manuscript Draft--

|                                                      |                                                                                                                                                                                                                                                                                                                                                                                                                                                                                                                                                                                                                                                                                                                                                                                                                                                                                                                                                                                                                                                                                                                                                                                                                                                                                                                                                                                                                                                                                                                                                                                                                                                                                                                                                                                                                                                                                                                            |                         |
|------------------------------------------------------|----------------------------------------------------------------------------------------------------------------------------------------------------------------------------------------------------------------------------------------------------------------------------------------------------------------------------------------------------------------------------------------------------------------------------------------------------------------------------------------------------------------------------------------------------------------------------------------------------------------------------------------------------------------------------------------------------------------------------------------------------------------------------------------------------------------------------------------------------------------------------------------------------------------------------------------------------------------------------------------------------------------------------------------------------------------------------------------------------------------------------------------------------------------------------------------------------------------------------------------------------------------------------------------------------------------------------------------------------------------------------------------------------------------------------------------------------------------------------------------------------------------------------------------------------------------------------------------------------------------------------------------------------------------------------------------------------------------------------------------------------------------------------------------------------------------------------------------------------------------------------------------------------------------------------|-------------------------|
| <b>Manuscript Number:</b>                            | GIGA-D-22-00042                                                                                                                                                                                                                                                                                                                                                                                                                                                                                                                                                                                                                                                                                                                                                                                                                                                                                                                                                                                                                                                                                                                                                                                                                                                                                                                                                                                                                                                                                                                                                                                                                                                                                                                                                                                                                                                                                                            |                         |
| <b>Full Title:</b>                                   | Defining the characteristics of interferon-alpha-stimulated human genes: insight from expression data and machine-learning                                                                                                                                                                                                                                                                                                                                                                                                                                                                                                                                                                                                                                                                                                                                                                                                                                                                                                                                                                                                                                                                                                                                                                                                                                                                                                                                                                                                                                                                                                                                                                                                                                                                                                                                                                                                 |                         |
| <b>Article Type:</b>                                 | Research                                                                                                                                                                                                                                                                                                                                                                                                                                                                                                                                                                                                                                                                                                                                                                                                                                                                                                                                                                                                                                                                                                                                                                                                                                                                                                                                                                                                                                                                                                                                                                                                                                                                                                                                                                                                                                                                                                                   |                         |
| <b>Funding Information:</b>                          | Medical Research Council (MC_UU_1201412)                                                                                                                                                                                                                                                                                                                                                                                                                                                                                                                                                                                                                                                                                                                                                                                                                                                                                                                                                                                                                                                                                                                                                                                                                                                                                                                                                                                                                                                                                                                                                                                                                                                                                                                                                                                                                                                                                   | Prof David L. Robertson |
|                                                      | China Scholarship Council (201706620069)                                                                                                                                                                                                                                                                                                                                                                                                                                                                                                                                                                                                                                                                                                                                                                                                                                                                                                                                                                                                                                                                                                                                                                                                                                                                                                                                                                                                                                                                                                                                                                                                                                                                                                                                                                                                                                                                                   | Mr Haiting Chai         |
| <b>Abstract:</b>                                     | <p>Background</p> <p>A virus-infected cell triggers a signalling cascade resulting in the secretion of interferons (IFNs). It in turn induces the up-regulation of the IFN stimulated genes (ISGs) that play anti-pathogen roles in host defenses. Here, we conducted analyses on large-scale data relating to evolution, gene expression, sequence compositions, and network properties to elucidate factors associated with the stimulation of human genes in response to the typical IFN-<math>\alpha</math>.</p> <p>Results</p> <p>We propose that the ISGs are less evolutionary conserved than genes that are not significantly stimulated in IFN experiments (non-ISGs). ISGs show obvious depletion of GC-content in the coding region, leading to differential representations in their sequence compositions. The IFN repressed human genes (IRGs), which are down-regulated in IFN experiments can have similar properties to the ISGs. Additionally, we also design a machine-learning framework integrating the support vector machine and novel feature selection algorithm. It achieves an area under the receiver operating characteristic curve (AUC) of 0.7455 for the ISG prediction and demonstrates the similarity between the ISGs triggered by type I and III IFNs.</p> <p>Conclusions</p> <p>The ISGs have unique properties that make them different from the non-ISGs. Some of them have strong correlations with genes' expression following IFN-<math>\alpha</math> stimulations, which can be used as good features in machine learning. Our model predicts several genes as potential ISGs that so far have shown no significant differential expression when stimulated with IFN-<math>\alpha</math> in the cell/tissue types in the available databases. A webserver implementing our method is accessible at <a href="http://isgpre.cvr.gla.ac.uk/">http://isgpre.cvr.gla.ac.uk/</a>.</p> |                         |
| <b>Corresponding Author:</b>                         | Joseph Hughes<br>University of Glasgow Centre for Virus Research<br>Glasgow, Glasgow UNITED KINGDOM                                                                                                                                                                                                                                                                                                                                                                                                                                                                                                                                                                                                                                                                                                                                                                                                                                                                                                                                                                                                                                                                                                                                                                                                                                                                                                                                                                                                                                                                                                                                                                                                                                                                                                                                                                                                                        |                         |
| <b>Corresponding Author Secondary Information:</b>   |                                                                                                                                                                                                                                                                                                                                                                                                                                                                                                                                                                                                                                                                                                                                                                                                                                                                                                                                                                                                                                                                                                                                                                                                                                                                                                                                                                                                                                                                                                                                                                                                                                                                                                                                                                                                                                                                                                                            |                         |
| <b>Corresponding Author's Institution:</b>           | University of Glasgow Centre for Virus Research                                                                                                                                                                                                                                                                                                                                                                                                                                                                                                                                                                                                                                                                                                                                                                                                                                                                                                                                                                                                                                                                                                                                                                                                                                                                                                                                                                                                                                                                                                                                                                                                                                                                                                                                                                                                                                                                            |                         |
| <b>Corresponding Author's Secondary Institution:</b> |                                                                                                                                                                                                                                                                                                                                                                                                                                                                                                                                                                                                                                                                                                                                                                                                                                                                                                                                                                                                                                                                                                                                                                                                                                                                                                                                                                                                                                                                                                                                                                                                                                                                                                                                                                                                                                                                                                                            |                         |
| <b>First Author:</b>                                 | Haiting Chai                                                                                                                                                                                                                                                                                                                                                                                                                                                                                                                                                                                                                                                                                                                                                                                                                                                                                                                                                                                                                                                                                                                                                                                                                                                                                                                                                                                                                                                                                                                                                                                                                                                                                                                                                                                                                                                                                                               |                         |
| <b>First Author Secondary Information:</b>           |                                                                                                                                                                                                                                                                                                                                                                                                                                                                                                                                                                                                                                                                                                                                                                                                                                                                                                                                                                                                                                                                                                                                                                                                                                                                                                                                                                                                                                                                                                                                                                                                                                                                                                                                                                                                                                                                                                                            |                         |
| <b>Order of Authors:</b>                             | Haiting Chai                                                                                                                                                                                                                                                                                                                                                                                                                                                                                                                                                                                                                                                                                                                                                                                                                                                                                                                                                                                                                                                                                                                                                                                                                                                                                                                                                                                                                                                                                                                                                                                                                                                                                                                                                                                                                                                                                                               |                         |
|                                                      | Quan Gu                                                                                                                                                                                                                                                                                                                                                                                                                                                                                                                                                                                                                                                                                                                                                                                                                                                                                                                                                                                                                                                                                                                                                                                                                                                                                                                                                                                                                                                                                                                                                                                                                                                                                                                                                                                                                                                                                                                    |                         |
|                                                      |                                                                                                                                                                                                                                                                                                                                                                                                                                                                                                                                                                                                                                                                                                                                                                                                                                                                                                                                                                                                                                                                                                                                                                                                                                                                                                                                                                                                                                                                                                                                                                                                                                                                                                                                                                                                                                                                                                                            |                         |

|                                                                                                                                                                                                                                                                                                                                                                                                                                                                                                                                     |                    |
|-------------------------------------------------------------------------------------------------------------------------------------------------------------------------------------------------------------------------------------------------------------------------------------------------------------------------------------------------------------------------------------------------------------------------------------------------------------------------------------------------------------------------------------|--------------------|
|                                                                                                                                                                                                                                                                                                                                                                                                                                                                                                                                     | Joseph Hughes      |
|                                                                                                                                                                                                                                                                                                                                                                                                                                                                                                                                     | David L. Robertson |
| <b>Order of Authors Secondary Information:</b>                                                                                                                                                                                                                                                                                                                                                                                                                                                                                      |                    |
| <b>Additional Information:</b>                                                                                                                                                                                                                                                                                                                                                                                                                                                                                                      |                    |
| <b>Question</b>                                                                                                                                                                                                                                                                                                                                                                                                                                                                                                                     | <b>Response</b>    |
| Are you submitting this manuscript to a special series or article collection?                                                                                                                                                                                                                                                                                                                                                                                                                                                       | No                 |
| <p><b>Experimental design and statistics</b></p> <p>Full details of the experimental design and statistical methods used should be given in the Methods section, as detailed in our <a href="#">Minimum Standards Reporting Checklist</a>. Information essential to interpreting the data presented should be made available in the figure legends.</p> <p>Have you included all the information requested in your manuscript?</p>                                                                                                  | Yes                |
| <p><b>Resources</b></p> <p>A description of all resources used, including antibodies, cell lines, animals and software tools, with enough information to allow them to be uniquely identified, should be included in the Methods section. Authors are strongly encouraged to cite <a href="#">Research Resource Identifiers</a> (RRIDs) for antibodies, model organisms and tools, where possible.</p> <p>Have you included the information requested as detailed in our <a href="#">Minimum Standards Reporting Checklist</a>?</p> | Yes                |
| <p><b>Availability of data and materials</b></p> <p>All datasets and code on which the conclusions of the paper rely must be either included in your submission or deposited in <a href="#">publicly available repositories</a> (where available and ethically appropriate), referencing such data using</p>                                                                                                                                                                                                                        | Yes                |

a unique identifier in the references and in the “Availability of Data and Materials” section of your manuscript.

Have you have met the above requirement as detailed in our [Minimum Standards Reporting Checklist](#)?

# 1 **Defining the characteristics of interferon-alpha-stimulated human genes:** 2 **insight from expression data and machine-learning**

3

4 Haiting Chai<sup>1</sup>, Quan Gu<sup>1</sup>, Joseph Hughes<sup>1,\*</sup>, David L. Robertson<sup>1,\*</sup>

5

6 <sup>1</sup>MRC-University of Glasgow Centre for Virus Research, Glasgow, United Kingdom

7

8 \*[david.l.robertson@glasgow.ac.uk](mailto:david.l.robertson@glasgow.ac.uk), [joseph.hughes@glasgow.ac.uk](mailto:joseph.hughes@glasgow.ac.uk)

9

10

## 11 **Abstract**

12 **Background:** A virus-infected cell triggers a signalling cascade resulting in the secretion of  
13 interferons (IFNs). It in turn induces the up-regulation of the IFN stimulated genes (ISGs) that  
14 play anti-pathogen roles in host defenses. Here, we conducted analyses on large-scale data  
15 relating to evolution, gene expression, sequence compositions, and network properties to  
16 elucidate factors associated with the stimulation of human genes in response to the typical IFN-  
17  $\alpha$ .

18 **Results:** We propose that the ISGs are less evolutionary conserved than genes that are not  
19 significantly stimulated in IFN experiments (non-ISGs). ISGs show obvious depletion of GC-  
20 content in the coding region, leading to differential representations in their sequence  
21 compositions. The IFN repressed human genes (IRGs), which are down-regulated in IFN  
22 experiments can have similar properties to the ISGs. Additionally, we also design a machine-  
23 learning framework integrating the support vector machine and novel feature selection  
24 algorithm. It achieves an area under the receiver operating characteristic curve (AUC) of

25 0.7455 for the ISG prediction and demonstrates the similarity between the ISGs triggered by  
26 type I and III IFNs.

27 **Conclusions:** The ISGs have unique properties that make them different from the non-ISGs.  
28 Some of them have strong correlations with genes' expression following IFN- $\alpha$  stimulations.  
29 which can be used as good features in machine learning. Our model predicts several genes as  
30 potential ISGs that so far have shown no significant differential expression when stimulated  
31 with IFN- $\alpha$  in the cell/tissue types in the available databases. A webserver implementing our  
32 method is accessible at <http://isgpre.cvr.gla.ac.uk/>.

33

34 **Key words:** interferon, interferon stimulated genes, omics data analyses, machine-learning.

35

36

## 37 **Introduction**

38 Interferons (IFNs) are a family of cytokines originally defined for their capacity to interfere  
39 with viral replication. They are secreted from host cells after an infection by pathogens such as  
40 bacteria or viruses to trigger the innate immune response with the aim of inhibiting viral spread  
41 by 'warning' uninfected cells [1]. The response induced by IFNs is usually fast and  
42 feedforward, especially to synthesize new IFNs, which guarantees a full response even if the  
43 initial activation is limited [2]. In humans, several IFNs have been discovered (e.g. IFN-  
44  $\alpha/\beta/\epsilon/\kappa/\omega/\gamma/\lambda$  [3-8]). IFN- $\alpha$ , IFN- $\beta$ , IFN- $\epsilon$ , IFN- $\kappa$ , IFN- $\omega$  are grouped into type I IFNs for  
45 signalling through the common IFN- $\alpha$  receptor (IFNAR) complex present on target cells [3-6]  
46 (**Figure 1A**). IFN- $\alpha$  comprises 13 subtypes in humans while the remaining type I IFNs are  
47 encoded by a specific gene [9]. IFN- $\lambda$  targets IFN- $\lambda$  receptor 1 (IFNLR1)/interleukin-10  
48 receptor 2 (IL-10R2) and was classified as type III IFN since its discovery in 2003 [8] (**Figure**  
49 **1C**). Similar to type I IFNs, IFN- $\lambda$  also exert antiviral properties but functions less intensely

50 [10-12]. IFN- $\gamma$  is classified as type II IFN and manifest its biological effects by interacting with  
51 IFN- $\gamma$  receptor (IFNGR) [7] (**Figure 1B**). In contrast to type I and III IFNs, IFN- $\gamma$  is also anti-  
52 pathogen, immunomodulatory, and proinflammatory but more focused on establishing cell  
53 immunity [3,7,11,13].

54 All three types of IFNs are capable of activating the Janus kinase/signal transducer and  
55 activator of transcription (JAK-STAT) pathway and inducing the transcriptional up-regulation  
56 of approximately 10% of human genes that prime cells for stronger pathogen detections and  
57 defenses [9,14,15]. Henceforth, these up-regulated human genes are referred to as the IFN-  
58 stimulated genes (ISGs). They play an important role in the establishment of the cellular  
59 antiviral state, the inhibition of viral infection and the return to cellular homeostasis [3,9,14,16].  
60 For example, the ectopic expression of heparinase (HPSE) can inhibits the attachment of  
61 multiple viruses [17,18]; interferon induced transmembrane proteins (IFITM) can impair the  
62 entry of multiple viruses and traffic viral particles to degradative lysosomes [19,20]; MX  
63 dynamin like GTPase proteins (MX) can effectively block early steps of multiple viral  
64 replication cycles [21]. Abnormality in the IFN-signalling cascade, for example, the absence  
65 of signal transducer and activator of transcription 1 (STAT1) will lead to the failure of  
66 activating ISGs, making the host cell highly susceptible to virus infections [22].

67

68 **Figure 1. Illustration of signalling cascade triggered by different IFNs.** In (A), type I IFN  
69 signals through IFNAR, Janus kinase 1(JAK1), tyrosine kinase 2 (TYK2), STAT, and IFN  
70 regulatory factor 9 (IRF9) to form IFN stimulated gene factor 3 complex (ISGF3), and then  
71 bind to IFN stimulated response elements (ISRE) to induce the expression of type I ISGs. In  
72 (B), type II IFN signals through IFNGR, JAK1 and JAK2 to form IFN- $\gamma$  activation factor (GAF)  
73 and then bind to gamma-activated sequence promoter elements (GAS) to induce the expression  
74 of type II ISGs. In (C), type III IFN signals through IFNLR1, IL-10R2, JAK1, TYK2, STAT,

75 and IRF9 to form ISGF3, and then bind to ISRE to induce the expression of type III ISGs.  
76 Figure created using the BioRender (<https://biorender.com/>).

77

78 Most research on the ISGs has focused on elucidating the role of the ISGs in antiviral  
79 activities or discovering new ISGs within or across species [3,9,14,19,23,24]. The  
80 identification of ISGs can be achieved via various approaches. Associating gene expression  
81 with suppression of viral infection is a good strategy to identify ISGs with obvious antiviral  
82 performance, exemplified by the influenza inhibitor, MX dynamin like GTPase 1 (MX1), and  
83 the human immunodeficiency virus 1 inhibitor, MX dynamin like GTPase 2 (MX2) [21].  
84 CRISPR screening is a loss-of-function experimental approach to identify ISGs required for  
85 IFN-mediated inhibition to viruses. It enabled the discovery of tripartite motif containing 5  
86 (TRIM5), MX2 and bone marrow stromal cell antigen 2 (BST2) [25]. Monitoring the ectopic  
87 expression of ISGs is another instrumental way to find some ISGs that are individually  
88 sufficient for viral suppression [26], for example, interferon stimulated exonuclease gene 20  
89 (ISG20) and ISG15 ubiquitin like modifier (ISG15). Using RNA-sequencing [27] and fold  
90 change-based criterion to measure whether a target human gene is induced by IFN signalling  
91 now has become a well-accepted idea [24,28,29]. In most cases, a gene is defined as IFN  
92 stimulated (up-regulated) when its expression value is more than doubled with the presence of  
93 IFNs (fold change > 2) [3,24,30]. There are also many online databases to support IFN- or ISG-  
94 related research. For example, Interferome (<http://www.interferome.org>) provides an excellent  
95 resource by compiling *in vivo* and *in vitro* gene expression profiles in the context of IFN  
96 stimulation [24]. The Orthologous Clusters of Interferon-stimulated Genes (OCISG,  
97 <http://isg.data.cvr.ac.uk>) demonstrates an evolutionary comparative approach of genes  
98 differentially expressed in type I IFN system for ten different species [3].

99           We notice that a same human gene may show differential response to different IFNs in  
100 different tissues or cells [24]. Despite some well-investigated ISGs, the majority of classified  
101 ISGs have limitedly expression following IFN stimulations [3,24]. It means that the difference  
102 between ISGs and those human genes not significantly up-regulated in the presence of IFNs  
103 (non-ISGs) may not be obvious especially when being assessed more generally. It should also  
104 be noted that, within non-ISGs, there are a group of genes down-regulated during IFN  
105 stimulations. We refer to them as interferon-repressed human genes (IRGs) and they constitute  
106 another major part of the IFN regulation system [3,31]. Collectively, the complex nature of the  
107 IFN-stimulated system results in knowledge that is far from comprehensive.

108           In this study, we try to associate the inherent properties of human genes with their  
109 expression following IFN- $\alpha$  stimulations. We propose that it is feasible to make ISG  
110 predictions on human genes with a model only compiled from the knowledge of IFN- $\alpha$   
111 responses in the human fibroblast cells. To achieve these ends, we first constructed a refined  
112 high-confidence dataset consisting of 620 ISGs and 874 non-ISGs by checking the genes across  
113 multiple databases including the OCISG [3], Interferome [24], and Reference Sequence  
114 (RefSeq) [32]. The analyses were conducted primarily on our refined data using genome- and  
115 proteome-based features that were likely to influence the expression of human genes in the  
116 presence of IFN- $\alpha$ . Then based on the calculated features, we designed a machine learning  
117 framework with an optimised feature selection strategy for the prediction of putative ISGs in  
118 different IFN systems. Finally, we also developed an online web server that implemented our  
119 machine learning method at <http://isgpre.cvr.gla.ac.uk/>.

120

121



## 122 **Results**

### 123 **Evolutionary characteristics of ISGs**

124 In this study, we constructed the dataset S2 from 10836 well-annotated human genes (dataset  
125 S1). It consists of 620 ISGs and 874 non-ISGs with high confidence based on their records in  
126 both the OCISG [3] and Interferome [24]. The compiled 10836 human genes were used as the  
127 background set and were evolutionarily unrelated to each other as they were retrieved from the  
128 OCISG [3] that compiled clusters of orthologous genes based on whole-genome alignments.  
129 Detailed information about our compiled datasets is provided in **Table 5** and **Supplementary**  
130 **Data S1**.

131 Here, we explored features relating to alternative splicing [33], duplication [34] and  
132 mutation [35]. We used the number of open reading frames (ORFs) and transcripts of a human  
133 gene to represent the diversity of its alternative splicing process. Meanwhile, the usage of  
134 protein-coding exons was quantified to reflect the complexity of the alternative splicing process.  
135 By calculating the average number of ORFs with respect to different  $\text{Log}_2(\text{Fold Change})$  levels  
136 of expression (window size = 0.1) in the presence of IFN- $\alpha$ , we found that more highly  
137 upregulated human genes tended to have less ORFs (Pearson's correlation coefficient (PCC) =  
138 -0.287, **Figure 2A**). As for the latter two features relating to the transcripts and protein-coding  
139 exons, similar negative relationships were observed when  $\text{Log}_2(\text{Fold Change})$  increased  
140 (**Figure 2B & 2C**). These results illustrate that simple alternative splicing process may promote  
141 IFN- $\alpha$  up-regulation. Particularly, as the lowest value of  $\text{Log}_2(\text{Fold Change})$  for human genes  
142 not differentially expressed only reached around -0.9. Points placed left to the boundary ( $x = -$   
143 0.9) are all IRGs. They are generally placed below those non-ISGs with a  $\text{Log}_2(\text{Fold Change})$   
144 around zero, suggesting these three features (number of ORFs, number of transcripts and the  
145 usage of protein-coding exons) are all differentially represented in some IRGs compared to the  
146 remaining non-ISGs. This distribution also indicates that some IRGs have similar feature

147 patterns to ISGs, especially to those highly up-regulated in the presence of IFN- $\alpha$  (right part of  
148 the scatter plots in **Figure 2A, 2B & 2C**).

149

150 **Figure 2. The average representation of features associated with IFN- $\alpha$  stimulations in**  
151 **experiments.** (A) The numbers of ORFs and (B) transcripts are used as measurements of the  
152 diversity of alternative splicing process. (C) The counts of exons used for coding is used as a  
153 measurement of the complexity of alternative splicing process. These three plots are drawn  
154 based on the expression data of 8619 human genes with valid fold change in the IFN- $\alpha$   
155 experiments (**Supplementary Data S1**). 2217 human genes are not shown in these figures as  
156 they had insufficient read coverage to determine a fold change in the experiments (**Table 5**).  
157 Points in the scatter plot are located based on the average feature representation of genes with  
158 similar expression performance in experiments.

159

160 To determine whether the ISGs tend to originate from duplications, we counted the  
161 number of within human paralogs of each gene (**Figure 3A**). We found that there were around  
162 22% of singletons in our main dataset, whilst ISGs had 15% and non-ISGs had 26%. The result  
163 of a Mann-Whitney U test [36] indicated that the number of human paralogs was significantly  
164 under-represented in the ISGs compared to the background human genes ( $M_1 = 10.5$ ,  $M_2 = 11.5$ ,  
165  $p = 8.8E-03$ ). We hypothesize that such a difference is mainly caused by the imbalanced  
166 distribution of singletons in the ISGs and non-ISGs as it becomes smaller when singletons are  
167 excluded from the test ( $M_1 = 12.4$ ,  $M_2 = 14.6$ ,  $p > 0.05$ ). Next, we used the number of non-  
168 synonymous substitutions per non-synonymous site (dN) and synonymous substitutions per  
169 synonymous site (dS) within human paralogues as a measurement of differences in mutational  
170 signatures between different classes [37]. As shown in **Figure 3B**, non-synonymous  
171 substitutions are more frequently observed in the ISGs than in the background human genes

172 ( $M_1 = 0.62$ ,  $M_2 = 0.55$ ,  $p = 4.0E-03$ ). On the other hand, the ISGs also have a higher frequency  
173 of synonymous substitutions than the background human genes ( $M_1 = 37.7$ ,  $M_2 = 34.6$ ,  $p =$   
174  $1.1E-02$ ) (**Figure 3C**) but the difference is not as obvious as for non-synonymous substitutions.  
175 In **Figure 3D**, the distribution of dN/dS ratios within human paralogues indicates that most  
176 human genes are constrained by natural selection but the ISGs, in general, tend to be less  
177 conserved ( $M_1 = 0.036$ ,  $M_2 = 0.045$ ,  $p = 8.3E-03$ ). When eliminating the influence of  
178 duplication events, the ISGs are still less conserved than the non-ISGs but the difference in the  
179 dN/dS ratio is not significant ( $M_1 = 0.053$ ,  $M_2 = 0.031$ ,  $p > 0.05$ ).

180

181 **Figure 3. Differences in the evolutionary constraints of human genes.** (A) Paralogues  
182 within *Homo sapiens*. (B) Non-synonymous substitutions within human paralogues. (C)  
183 Synonymous substitutions within human paralogues. (D) dN/dS ratios within human  
184 paralogues. Here, the ISGs and non-ISGs are taken from dataset S2 while the background  
185 human genes are from dataset S1 (**Table 5**). Mann-Whitney U tests are applied for the  
186 hypothesis testing between the feature distribution of different classes. Boxes in the plot  
187 represent the major distribution of values (from the first to the third quartile); outliers are added  
188 for values higher than two-fold of the third quartile; cross symbol marks the position of the  
189 average value including the outliers; upper and lower whiskers show the maximum and  
190 minimum values excluding the outliers.

191

### 192 **Differences in the coding region of the canonical transcripts**

193 Compared to general profile features (e.g., number of ORFs), the sequences themselves provide  
194 more direct mapping to the protein function and structure [38]. Here, we encoded 344  
195 parametric features and 7026 non-parametric features from complementary DNA (cDNA) of  
196 the canonical transcript to explore features specific to ISGs. We divided the parametric features

197 into four categories and compared their representations among three different groups of human  
198 genes including recompiled ISGs from dataset S2, recompiled non-ISGs from dataset S2, and  
199 the background human genes from dataset S1 (**Figure 4**). Firstly, guanine and cytosine were  
200 both more depleted in ISGs than non-ISGs, leading to an under-representation of GC-content  
201 in the ISGs (Mann-Whitney U test:  $M_1 = 52\%$ ,  $M_2 = 55\%$ ,  $p = 2.3E-11$ ). This attribute was  
202 antithetical to the GC-biased gene conversion (gBGC), making ISGs less stable with weak  
203 evolutionary conservation (**Figure 3**) [39]. Additionally, the under-representation of GC-  
204 content also influenced the representation of other dinucleotide features. Among all  
205 dinucleotide depletions in ISGs, CpG composition was ranked the first followed by GpG and  
206 GpC composition ( $p = 2.9E-14$ ,  $4.9E-13$  and  $1.2E-10$ , respectively). In turn, adenine and  
207 thymine-related dinucleotide compositions, exemplified by ApT and TpA were more enriched  
208 in ISGs than non-ISGs ( $p = 8.0E-10$  and  $8.5E-10$ , respectively).

209 We compared the usage of 64 different codons in the third category as their frequencies  
210 influence transcription efficiency [40]. Differences between the ISGs and background human  
211 genes were observed in codons for 11 amino acids including leucine (L), isoleucine (I), valine  
212 (V), serine (S), threonine (T), alanine (A), glutamine (Q), lysine (K), glutamic acid (E),  
213 arginine (R), and glycine (G). The most significant difference was observed in the usage of  
214 codon 'AGA'. Among all arginine-targeted alternative codons, codon 'AGA' was usually  
215 favoured, and its usage reached an estimated 25% in the ISGs but reduced to 22% in the  
216 background human genes ( $p = 1.4E-05$ ). It was even significantly lower in the non-ISGs, at 18%  
217 ( $p = 1.9E-13$ ). On the other hand, compared to the background human genes, the codon 'CAG'  
218 coding for amino acid 'Q' was the most under-represented in the ISGs. It was less favoured by  
219 the ISGs than non-ISGs ( $M_1 = 72\%$ ,  $M_2 = 78\%$ ,  $p = 7.3E-13$ ) although it dominated in coding  
220 patterns. As for the three stop codons, comparing with the background human genes, the usage  
221 of the ochre stop codon ('TAA') was over-represented in the ISGs ( $M_1 = 28\%$ ,  $M_2 = 33\%$ ,  $p =$

222 9.7E-03). In this category of codon usage, the features with different frequencies between the  
223 ISGs and background human genes became more discriminating when comparing the ISGs  
224 with non-ISGs. Significant differences in codon usages between the ISGs and non-ISGs were  
225 widely observed except for methionine (M) and tryptophan (W). Hence, despite the limited  
226 differences of codon usages between the ISGs and background human genes, these features  
227 were useful for discriminating the ISGs from non-ISGs.

228 In the last category, we calculated the occurrence frequency of 256 nucleotide 4-mers  
229 to add some positional resolution for finding and comparing interesting organisational  
230 structures [41]. Among the 256 4-mers, 46 of them were differentially represented between the  
231 ISGs and background human genes (**Supplementary Data S2**). Most of these 4-mers were  
232 over-represented by the ISGs except two with the pattern 'TAAA' and 'CGCG'. Interestingly,  
233 the feature of 'TAAA' composition became a positive factor when comparing ISGs and non-  
234 ISGs ( $M_1 = 4.1\%$ ,  $M_2 = 3.7\%$ ,  $p = 4.1E-06$ ), suggesting it might be a good feature to discern  
235 potential or incorrectly labelled ISGs. We found six nucleotide 4-mers: 'ACCC', 'AGTC',  
236 'AGTG', 'TGCT', 'GACC', and 'GTGC' were over-represented in the ISGs when compared  
237 to the background human genes. However, they were not differentially represented when  
238 comparing the ISGs with non-ISGs. These six features might be inherently biased for some  
239 reasons and were not powerful enough to distinguish the ISGs from non-ISGs. In addition to  
240 the aforementioned 40 features (except 4-mer 'ACCC', 'AGTC', 'AGTG', 'TGCT', 'GACC',  
241 and 'GTGC') that were differentially represented in ISGs compared to background human  
242 genes, we found a further 39 features nucleotide 4-mers differentially represented between  
243 ISGs and non-ISGs (**Supplementary Data S2**).

244 To check the effect of these aforementioned 343 features on the level of stimulation in  
245 the IFN- $\alpha$  system ( $\text{Log}_2(\text{Fold Change}) > 0$ ), we calculated the PCC for the normalised features  
246 (**Equation 2**) and found 106 features were positively related to the increase of fold change, and

247 34 features were suppressed when human gene were more up-regulated after IFN- $\alpha$  treatments  
248 (Student t-test:  $p < 0.05$ ) (**Supplementary Data S3**). ApA composition showed the most  
249 obvious positive correlation with stimulation level (PCC = 0.464,  $p = 8.8E-06$ ) while negative  
250 association between the representation of 4-mer 'CGCG' and IFN- $\alpha$ -induced up-regulation was  
251 the most significant (PCC = -0.593,  $p = 3.2E-09$ ). Human genes with higher up-regulation in  
252 the presence of IFN- $\alpha$  contained more codons 'CAA' rather than 'CAG' for coding amino acid  
253 'Q'. The depletion of GC-content, especially cytosine content, promotes the suppression of  
254 many nucleotide compositions in the cDNA, e.g. CpG composition.

255

256 **Figure 4. Differences in the representation of parametric features encoded from coding**  
257 **regions (canonical).** Mann-Whitney U tests are applied for hypothesis testing and the results  
258 are provided in the **Supplementary Data S2**. Here, the ISGs and non-ISGs are taken from  
259 dataset S2 while the background human genes are from dataset S1 (**Table 5**).

260

261 To find conserved sequence patterns relating to gene regulations [42], we checked the  
262 existence of 2940, 44100 and 661500 short linear nucleotide patterns (SLNPs) consisting of  
263 three to five consecutive nucleobases in the group of the ISGs and non-ISGs. By using a  
264 positive 5% difference in the occurrence frequency as cut-off threshold, we found 7884 SLNPs  
265 with a maximum difference in representation around 15%. After using Pearson's chi-squared  
266 tests and Benjamini-Hochberg correction to avoid type I error in multiple hypotheses [43],  
267 7025 SLNPs remained with an adjusted p-value lower than 0.01 (**Supplementary Data S4**),  
268 hereon referred to as flagged SLNPs. The differentially represented 7025 SLNPs were ranked  
269 according to the adjusted p-value. As shown in **Figure 5A**, dinucleotide 'TpA' dominates in  
270 the top 10, top 100, top 1000, and all differentially represented SLNPs even if TpA  
271 representation is suppressed in the cDNA of genes' canonical transcripts compared to other

272 dinucleotides. Dinucleotide ‘ApT’ and ‘ApA’ are also frequently observed in the flagged  
273 SLNPs but their occurrences do not show significant difference in the top 100 SLNPs  
274 (Pearson's chi-squared test:  $p > 0.05$ ). GC-related dinucleotides, e.g., ‘CpC’, ‘GpC’ and ‘GpG’  
275 are rarely observed in the flagged SLNPs especially in the top 10 or top 100. In view of these,  
276 we hypothesize that the differential representation of nucleotide compositions influences and  
277 reflects on the pattern of SLNPs in the ISGs. By checking the co-occurrence status of the  
278 flagged SLNPs, we found that these sequence patterns had a cumulative effect in distinguishing  
279 the ISGs from non-ISGs especially when the number of cooccurring SLNPs reached around  
280 5320 (Pearson's chi-squared test:  $p = 7.9E-13$ , **Figure 5B**). There were eight (~1.3%) ISGs in  
281 the dataset S2 containing all the flagged 7025 SLNPs. Their up-regulation after IFN- $\alpha$   
282 treatment were generally low with a fold change fluctuating around 2.2. However, some of  
283 these eight genes such as desmoplakin (DSP) were clearly highly up-regulated in endothelial  
284 cells isolated from human umbilical cord veins after not only IFN- $\alpha$  treatments (fold change =  
285 11.1) but also IFN- $\beta$  treatments (fold change = 13.7). We also found some non-ISGs (e.g.,  
286 hemicentin 1 (HMCN1)) and human genes with limited expression in the IFN- $\alpha$  experiments  
287 (ELGs) (e.g. tudor domain containing 6 (TDRD6)) containing the flagged SLNPs, but their  
288 frequencies were lower than that in the ISGs. Although there is an obvious imbalance between  
289 the number of the ISGs and non-ISGs in the human genome [9-11], the curve for the  
290 background human genes in **Figure 5B** is still closer to that for the ISGs rather than that for  
291 the non-ISGs. It suggests that some genetic patterns are widely represented in the coding region  
292 of human genes, making them potentially up-regulated in the IFN- $\alpha$  system.

293

294 **Figure 5. SLNPs in the coding regions (canonical).** (A) Influence of dinucleotide  
295 compositions on the flagged SLNPs. (B) The co-occurrence status of SLNPs in different human  
296 genes. Ranks in (A) are generated based on the adjust p value given by Pearson's chi-squared

297 tests after Benjamini-Hochberg correction procedure. Detailed results of the hypothesis tests  
298 are provided in **Supplementary Data S4**. Here, the ISGs and non-ISGs are taken from dataset  
299 S2 while the background human genes are from dataset S1 (**Table 5**).

300

### 301 **Differences in the protein sequence**

302 We used the protein sequences generated by the canonical transcript to extract features at the  
303 proteomic level. In addition to the basic composition of 20 standard amino acids, we considered  
304 17 additional features related to physicochemical (e.g., hydrophathy and polarity) or geometric  
305 properties (e.g., volume) [44,45]. We found several amino acids that were either enriched or  
306 depleted in the ISG products compared to the background human proteins, which were  
307 produced by genes in dataset S1 (**Figure 6**). The differences were even more marked between  
308 protein products of the ISGs and non-ISGs, highlighting some differences that were not  
309 observed when comparing the ISG products to the background human proteins (e.g., isoleucine  
310 composition). The differences observed in the amino acid compositions were at least in part  
311 associated with the patterns previously observed in features encoded from genetic coding  
312 regions. For example, asparagine (N) showed significant over-representation in the ISG  
313 products compared to the non-ISG products or background human proteins (Mann-Whitney U  
314 test:  $p = 2.8E-12$  and  $1.2E-03$ , respectively). This was expected as there are only two codons,  
315 i.e., ‘AAT’ and ‘AAC’ coding for amino acid ‘N’, and dinucleotide ‘ApA’ showed a  
316 remarkable enrichment in the coding region of ISGs. A similar explanation could be given for  
317 the relationship between the deficiency of GpG content and amino acid ‘G’. The translation of  
318 amino acid ‘K’ was also influenced by ApA composition but was not significant due to the  
319 mild representation of dinucleotide ‘ApG’ in the genetic coding region. Additionally, as  
320 previously mentioned, the ISGs showed a significant depletion in the CpG content, and  
321 consequently, the amino acid ‘A’ and ‘R’ in the ISG products were significantly under-



322 represented. Cysteine (C) was not frequently observed in human proteins but still showed a  
323 relatively significant enrichment in the ISG products ( $M_1 = 2.3\%$ ,  $M_2 = 2.5\%$ ,  $p = 1.8E-03$ ).

324 When focusing on the composition of amino acids grouped by physicochemical or  
325 geometric properties, we found some features differentially represented between the ISG  
326 products and background human proteins. The result showed that hydroxyl (amino acid 'S' and  
327 'T'), amide (amino acid 'N' and 'Q'), or sulfur amino acids (amino acid 'C' and 'M') were  
328 more abundant in the ISG products compared to the background human proteins (Mann-  
329 Whitney U test:  $p = 0.04$ ,  $1.0E-03$  and  $0.02$ , respectively). Small amino acids (amino acid 'N',  
330 'C', 'T', aspartic acid (D) and proline (P), the volume ranges from 108.5 to 116.1 cubic  
331 angstroms) were more frequently observed in the ISG products than in background human  
332 proteins ( $M_1 = 22.1\%$ ,  $M_2 = 21.7\%$ ,  $p = 0.02$ ). These differences became more marked when  
333 comparing the representation of these features between the ISG and non-ISG products. For  
334 example, features relating to chemical properties of the side chain (e.g., aliphatic), charge status  
335 and geometric volume showed differences between proteins produced by the ISGs and non-  
336 ISGs. Some features such as neutral amino acids that include amino acid 'G', 'P', 'S', 'T',  
337 histidine (H) and tyrosine (Y) were not differentially represented between the ISG and non-  
338 ISG products, but they indicated obvious association with the change of IFN- $\alpha$ -triggered  
339 stimulations (PCC =  $-0.556$ ,  $p = 4.1E-08$ ) (**Supplementary Data S3**).

340

341 **Figure 6. Differences in the representation of parametric features encoded from protein**  
342 **sequences.** Mann-Whitney U tests are applied for hypothesis testing and the results are  
343 provided in the **Supplementary Data S2**. Here, the ISGs and non-ISGs are taken from dataset  
344 S2 while the background human genes are from dataset S1 (**Table 5**). Aliphatic group: amino  
345 acid 'A', 'G', 'I', 'L', 'P' and 'V'; aromatic/huge group: amino acid 'F', 'W' and 'Y' (volume >  
346 180 cubic angstroms); sulfur group: amino acid 'C' and 'M'; hydroxyl group: amino acid 'S'

347 and 'T'; acidic/negative\_charged group: amino acid 'D' and 'E'; amide group: amino acid 'N'  
348 and 'Q'; positive\_charged group: amino acid 'R', 'H' and 'K'; hydrophobic group: amino acid  
349 'A', 'C', 'I', 'L', 'M', 'F', 'V', and 'W' that participates to the hydrophobic core of the  
350 structural domains [46]; neutral group: amino acid 'G', 'H', 'P', 'S', 'T' and 'Y'; hydrophilic  
351 group: amino acid 'R', 'N', 'D', 'Q', 'E' and 'K'; Tiny group: amino acid 'G', 'A' and 'S'  
352 (volume < 90 cubic angstroms); small group: amino acid 'N', 'D', 'C', 'P' and 'T' (volume  
353 ranged from 109 to 116 cubic angstroms); medium group: amino acid 'Q', 'E', 'H' and 'V'  
354 (volume ranged within 138 to 153 cubic angstroms); large group: amino acid 'R', 'I', 'L', 'K'  
355 and 'M' (volume ranged within 163 to 173 cubic angstroms); uncharged group: the remaining  
356 15 amino acids except electrically charged ones; polar group: amino acid 'R', 'H', 'K', 'D',  
357 'E', 'N', 'Q', 'S', 'T' and 'Y'; nonpolar group: the remaining 10 amino acids except polar ones.  
358

359         Next, we searched the sequence of the ISG products against that of the non-ISG  
360 products to find conserved short linear amino acid patterns (SLAAPs), which might have  
361 resulted from strong purifying selection [47]. As opposed to the analysis on the genetic  
362 sequence, we only obtained 19 enriched sequence patterns with a Pearson's chi-squared p value  
363 ranging from 1.5E-04 to 0.02 (**Table 1**), hereon referred to as flagged SLAAPs. They were  
364 greatly influenced by four polar amino acids: 'K', 'N', 'E' and 'S', and one nonpolar amino  
365 acid: 'L'. Some of these flagged SLAAPs, for example, SLAAP 'NVT' and 'S-N-E', were  
366 clearly over-represented in the ISG products compared to the background human proteins and  
367 could be used as features to differentiate the ISGs from background human genes. The third  
368 column in **Table 1** indicates a number of patterns that are lacking in the non-ISG products and  
369 hence may be the reason for the lack of up-regulation in the presence of IFN- $\alpha$ . Particularly,  
370 we noticed that SLAAP 'KEN' was a destruction motif that could be recognised or targeted by  
371 anaphase promoting complex (APC) for polyubiquitination and proteasome-mediated

372 degradation [48,49]. Results shown in **Figure 7A** illustrate that the co-occurrence of  
373 differentially represented SLAAPs (flagged) has a cumulative effect in distinguishing the ISGs  
374 from non-ISGs. This cumulative effect can even be achieved with only two random SLAAPs  
375 (Pearson's chi-squared test:  $p = 4.6E-10$ ). The bias in the co-occurring SLAAPs (flagged) in  
376 the background human proteins towards a pattern similar to the non-ISG products further  
377 proves the importance of these 19 SLAAPs. However, their co-occurrence is not associated  
378 with the level of IFN-triggered stimulations (PCC = 0.015,  $p > 0.05$ ) (**Figure 7B**).

379         Regions that lacked stable structures under normal physiological conditions within  
380 proteins are termed intrinsically disordered regions (IDRs). They play an important role in cell  
381 signalling [50]. Compared with ordered regions, IDRs are usually more accessible and have  
382 multiple binding motifs, which can potentially bind to multiple partners [51]. According to the  
383 results calculated by IUPred [52], we found 6721, 10510, and 119071 IDRs (IUpred score no  
384 less than 0.5) in proteins produced by the ISGs, non-ISGs and background human genes  
385 respectively. We hypothesize that enriched SLAAPs widely detected in the IDRs may be  
386 important for human protein-protein interactions or potentially virus mimicry [53]. For instance,  
387 in the ISG products, about 40.8% of SLAAP 'SxNxT' were observed in the IDRs, 14.9% higher  
388 than that in non-ISG products (**Table 1**). This difference reflected the importance of SLAAP  
389 'SxNxT' for target specificity of IFN- $\alpha$ -induced protein-protein interactions (PPIs) [9] even if  
390 it was not statistically significant. By contrast, the conditional frequency of SLAAP 'SxNxE'  
391 in the IDRs of the ISG and non-ISG products were almost the same, indicating that SLAAP  
392 'SxNxE' might have an association with some inherent attributes of the ISGs but was less likely  
393 to be involved in the IFN- $\alpha$ -induced PPIs. SLAAP 'KEN' in the IDRs also showed some  
394 interesting differences: in the non-ISG products, 41.9% of SLAAP 'KEN' were observed in  
395 the IDRs, 14.6% higher than that in the ISG products, which provided an effective approach to  
396 distinguish the ISGs from non-ISGs. When SLAAP 'KEN' is discovered in the ordered

397 globular region of a protein sequence, statistically, the protein is more likely to be produced by  
 398 an ISG, but this assumption is reversed if the SLAAP is located in an IDR (Pearson's chi-  
 399 squared tests:  $p = 0.03$ ). Despite the relatively low conditional frequency of SLAAP 'KEN' in  
 400 the IDRs of the ISG products, these SLAAPs in the IDR are more likely to be functionally  
 401 active than those falling within ordered globular regions [54].

402

403 **Table 1. Representation of SLAAPs in protein sequences and their IDRs.**

| SLAAP <sup>a</sup> | Frequency in                      | Bias based on the           | Conditional frequency in the IDRs of |                                                               |                      |
|--------------------|-----------------------------------|-----------------------------|--------------------------------------|---------------------------------------------------------------|----------------------|
|                    | ISG/non-ISG products <sup>b</sup> | frequency in human proteins | P value <sup>c</sup>                 | ISG/non-ISG products/background human proteins <sup>c,d</sup> | P value <sup>e</sup> |
| SxNxE              | 15.2%/8.8%                        | +47.6%/-14.2%               | 1.5E-04                              | 39.4%/40.3%/33.4%                                             | 0.90                 |
| ENE                | 15.0%/8.8%                        | +20.9%/-29.0%               | 2.1E-04                              | 37.6%/42.9%/40.9%                                             | 0.49                 |
| SxNxT              | 11.5%/6.2%                        | +21.9%/-34.2%               | 2.9E-04                              | 40.8%/25.9%/27.3%                                             | 0.08                 |
| SVI                | 15.2%/9.2%                        | +37.6%/-16.9%               | 3.6E-04                              | 18.1%/11.3%/15.2%                                             | 0.21                 |
| LxNL               | 23.7%/16.4%                       | +13.2%/-21.9%               | 4.0E-04                              | 10.2%/11.9%/9.4%                                              | 0.65                 |
| LxKL               | 30.8%/22.8%                       | +18.0%/-12.8%               | 4.9E-04                              | 12.6%/10.1%/8.7%                                              | 0.43                 |
| NVT                | 13.7%/8.5%                        | +52.1%/-6.1%                | 1.2E-03                              | 18.8%/21.6%/15.4%                                             | 0.66                 |
| ISS                | 20.5%/14.3%                       | +20.7%/-15.7%               | 1.7E-03                              | 29.9%/25.6%/23.8%                                             | 0.44                 |
| LKxK               | 24.4%/17.7%                       | +24.5%/-9.3%                | 1.8E-03                              | 14.6%/20.6%/20.0%                                             | 0.16                 |
| IKxE               | 14.2%/9.0%                        | +34.2%/-14.5%               | 1.8E-03                              | 26.1%/16.5%/25.8%                                             | 0.13                 |
| EKxI               | 15.8%/10.4%                       | +31.0%/-13.7%               | 2.0E-03                              | 15.3%/20.9%/16.0%                                             | 0.32                 |
| KxExS              | 16.9%/11.4%                       | +21.9%/-17.7%               | 2.4E-03                              | 36.2%/36.0%/39.2%                                             | 0.98                 |
| LNS                | 17.7%/12.1%                       | +21.2%/-17.1%               | 2.4E-03                              | 20.0%/25.5%/20.5%                                             | 0.34                 |
| KEN                | 16.0%/10.6%                       | +33.5%/-11.0%               | 2.4E-03                              | 27.3%/41.9%/34.8%                                             | 0.03                 |
| LxNxL              | 22.6%/17.5%                       | +14.3%/-11.4%               | 1.5E-02                              | 10.7%/11.8%/9.5%                                              | 0.78                 |
| KxExL              | 25.8%/20.5%                       | +25.7%/-0.3%                | 1.5E-02                              | 18.8%/17.9%/18.7%                                             | 0.84                 |
| KLL                | 27.1%/21.9%                       | +9.9%/-11.4%                | 1.9E-02                              | 11.3%/8.4%/9.9%                                               | 0.35                 |
| LKE                | 29.8%/24.5%                       | +18.2%/-3.0%                | 2.1E-02                              | 19.5%/24.8%/20.1%                                             | 0.20                 |
| LKxL               | 33.2%/27.7%                       | +15.0%/-4.2%                | 2.1E-02                              | 7.8%/12.4%/10.0%                                              | 0.11                 |

404 *a: 'x' in SLAAPs indicates one position occupied by a standard amino acid;*

405 *b: here, the ISGs and non-ISGs are taken from dataset S2 while the background human genes use samples from*  
406 *dataset S1 (Table 5);*

407 *c: p values in this column use Pearson's chi-squared tests to measure the difference of SLAAPs occurrences in*  
408 *the ISG and non-ISG products;*

409 *d: frequencies in this column are calculated based on a condition that corresponding SLAAPs are observed in*  
410 *the protein sequence;*

411 *e: p values in this column use Pearson's chi-squared tests to measure the difference of SLAAPs occurrences in*  
412 *the IDRs of the ISG and non-ISG products.*

413

414 **Figure 7. Representation of co-occurred SLAAPs (flagged) in our main dataset.** (A) The  
415 co-occurrence status of SLAAPs in different classes. (B) Relationship between co-occurrence  
416 of the marked SLAAPs and  $\text{Log}_2(\text{Fold Change})$  after IFN- $\alpha$  treatments. Here, the ISGs and  
417 non-ISGs are taken from dataset S2 while the background human genes are from dataset S1  
418 (Table 5). Points in (B) are located based on the average feature representation of genes with  
419 similar expression performance in IFN- $\alpha$  experiments.

420

### 421 **Differences in network profiles**

422 We constructed a network with 332,698 experimentally verified interactions among 17603  
423 human proteins (confidence score  $> 0.63$ ) from the Human Integrated Protein-Protein  
424 Interaction rEference (HIPPIE) database [55] to investigate if the connectivity among human  
425 proteins have association with genes' expression in the IFN- $\alpha$  experiments. 10169 out of 10836  
426 human proteins produced by genes in our background dataset S1 were included in the network.  
427 Nodes and edges of this network can be downloaded from our webserver at  
428 <http://isgpre.cvr.gla.ac.uk/>. Based on this network, we calculated eight features including the  
429 average shortest path, closeness, betweenness, stress, degree, neighbourhood connectivity,  
430 clustering coefficient, and topological coefficient.

431 As illustrated in **Figure 8B/G**, ISG products tend to have higher values of betweenness  
432 and stress than background human proteins (Mann-Whitney U test:  $p = 0.01$ , and  $0.03$ ,  
433 respectively), which means they are more likely to locate at key paths connecting different  
434 nodes of the PPI network. Some ISG products with high values of betweenness and stress, e.g.,  
435 tripartite motif containing 25 (TRIM25), can be considered as the shortcut or bottleneck of the  
436 network and play important roles in many PPIs including those related to the IFN- $\alpha$ -triggered  
437 immune activities [56,57]. However, such differential representation of betweenness does not  
438 mean ISG products are more likely to be or even be close to bottlenecks of the network  
439 compared to the background human proteins. Some examples shown in **Table 2** indicate that  
440 ISG products are less-connected by top-ranked bottlenecks and hubs of the network than non-  
441 ISG products or the background human proteins. This conclusion is not influenced by  
442 hub/bottleneck protein's performance in the IFN- $\alpha$  experiments. Comparing proteins produced  
443 by the ISGs and non-ISGs, we found the former tends to have lower values of clustering  
444 coefficient and neighbourhood connectivity (Mann-Whitney U test:  $p = 0.04$  and  $7.9E-03$ ,  
445 **Figure 8D/F**). This discovery indicates that the ISG products and some of their interacting  
446 proteins are less likely to be targeted by lots of proteins. It also supports the finding that the  
447 ISG products are involved in many shortest paths for nodes but are away from hubs or  
448 bottlenecks in the network. To some extents, this location also increases the length of the  
449 average shortest paths through ISG products in the network (**Figure 8A**).

450 When investigating the association between IFN- $\alpha$ -induced gene stimulation and  
451 network attributes of gene products, we only found the feature of neighbourhood connectivity  
452 was under-represented as the level of differential expression in the presence of IFN increases  
453 (PCC =  $-0.392$ ,  $p = 2.2E-04$ ). This suggests that proteins produced by genes that are highly up-  
454 regulated in response to IFN- $\alpha$  are further away from hubs in the PPI networks.

455

456 **Figure 8. Differences in network preferences.** The included features are: (A) average shortest  
 457 path (B) betweenness, (C) closeness, (D) clustering coefficient, (E) degree, (F) neighbourhood  
 458 connectivity, (G) stress, and (H) topological coefficient. Mann-Whitney U tests are applied for  
 459 hypothesis testing and the results were provided in the **Supplementary Data S2**. Here, the  
 460 ISGs and non-ISGs are taken from dataset S2 while the background human genes use samples  
 461 from dataset S1 (**Table 5**).

462

463 **Table 2. Interaction profiles of human proteins connecting top hubs/bottlenecks of the**  
 464 **HIPPIE network.**

| Human protein                                                                                          | TRIM25               | ELAVL1      | ESR2                            | NTRK1                  |
|--------------------------------------------------------------------------------------------------------|----------------------|-------------|---------------------------------|------------------------|
| Gene class                                                                                             | ISG                  | IRG         | Not included in S1 <sup>a</sup> |                        |
| Degree (hub rank)                                                                                      | 2295 (2nd)           | 1787 (4th)  | 2500 (1st)                      | 1976 (3rd)             |
| Betweenness (bottleneck rank)                                                                          | 0.067 (1st)          | 0.048 (4th) | 0.051 (3rd)                     | 0.026 (5th)            |
| Difference in interacting partners<br>(ISG products versus non-ISG products) <sup>b</sup>              | Depleted<br>P = 0.01 | P > 0.05    | Depleted<br>P = 1.1E-4          | Depleted<br>P = 5.5E-3 |
| Difference in interacting partners<br>(ISG products versus the background human proteins) <sup>b</sup> | P > 0.05             | P > 0.05    | Depleted<br>P = 8.1E-3          | Depleted<br>P = 0.03   |

465 *a: ESR2 and NTRK1 were not included in dataset S1 as their expression data were not compiled in OCISG;*

466 *b: differences here are measured via Pearson's chi-squared tests on human proteins interacting with the*  
 467 *corresponding hub/bottleneck protein.*

468

### 469 **Features highly associated with the level of IFN stimulations**

470 In this study, we encoded a total of 397 parametric and 7046 non-parametric features covering  
 471 the aspects of evolutionary conservation, nucleotide composition, transcription, amino acid  
 472 composition, and network profiles. In order to find out some key factors that may enhance or  
 473 suppress the stimulation of human genes in the IFN- $\alpha$  system, we compared the representation  
 474 of parametric features of human genes with different but positive Log<sub>2</sub>(Fold Change). Two  
 475 features on the co-occurrence of SLNPs and SLAAPs were not taken into consideration here

476 as they were more subjective than the other parametric features and were greatly influenced by  
477 the number of sequence patterns. Upon the calculation of PCC and the result of hypothesis  
478 tests, we found 168 features highly associated with the level of IFN- $\alpha$ -triggered stimulations  
479 (Student t-tests:  $p < 0.05$ ) (**Supplementary Data S3**). Among them, 118 features showed a  
480 positive correlation (**Figure 9**) while the remaining 50 features showed a negative correlation  
481 (**Figure 10**) with the change of up-regulation in IFN- $\alpha$  experiments. Among these 168 features,  
482 the number of ORFs, alternative splicing results, and counts of exons used for coding were  
483 encoded from characteristics of the gene. Average dN/dS and average dS within human  
484 paralogues were encoded based on the sequence alignment results from Ensembl [58]. 140  
485 and 22 features were encoded from the genetic sequence and proteomic sequence respectively.  
486 The last one, neighbourhood connectivity, was obtained from the network profile of a human  
487 interactome constructed based on experimentally verified data in the HIPPIE database [55].

488 In the positive group, the feature of 'large' amino acid compositions that includes the  
489 composition of five amino acids with geometric volume ranged from 163 to 173 cubic  
490 angstroms was ranked the first for having the highest PCC at 0.593 (Student t-test:  $p = 2.8E-$   
491 09). This feature was not highlighted previously as it did not have a strong signal for  
492 discriminating the ISGs from non-ISGs (Mann-Whitney U test:  $p > 0.05$ ). Similar phenomena  
493 were found on 87 features (64 positive correlations and 23 negative correlations) such as AG-  
494 content, ApG content and previously mentioned neutral amino acid composition. The strongest  
495 negative correlation between feature representation and IFN- $\alpha$ -triggered stimulations was  
496 found on the feature of 4-mer 'CGCG' (PCC = -0.593,  $p = 3.2E-09$ ). This feature also showed  
497 a differential distribution between the ISGs and non-ISGs, thus provided useful information to  
498 distinguish the ISGs from non-ISGs. Similar phenomena were found on 81 features (54 positive  
499 correlations and 27 negative correlations) such as previously mentioned GC-content, CpG  
500 content and the usage of codon 'GCG' coding for amino acid 'A'.



501 Collectively, the biased effect on the basic composition of nucleotides influences the  
502 correlation between the representation of sequence-based features and IFN- $\alpha$ -triggered  
503 stimulations. Human genes that show over-representation in more features listed in **Figure 9**  
504 are expected to be more up-regulated after IFN- $\alpha$  treatments at least in the human fibroblast  
505 cells. Meanwhile, the under-representation of features listed in **Figure 10** also contributes to  
506 the level of up-regulation in the IFN- $\alpha$  experiments.

507

508 **Figure 9. 118 features positively associated with higher up-regulation after IFN- $\alpha$**   
509 **treatments.** Features here are screened based on the PCC and results of Student t-tests ( $p <$   
510  $0.05$ ). Detailed results about PCC and hypothesis tests are provided in **Supplementary Data**  
511 **S3.**

512

513 **Figure 10. 50 features negatively associated with higher up-regulation after IFN- $\alpha$**   
514 **treatments.** Features here are screened based on the PCC and results of Student t-tests ( $p <$   
515  $0.05$ ). Detailed results about PCC and hypothesis tests are provided in **Supplementary Data**  
516 **S3.**

517

518 **Difference in feature representation of interferon-repressed genes and genes with low**  
519 **levels of expression**

520 We grouped human genes into two classes based on their response to the IFN- $\alpha$  in the human  
521 fibroblast cells. Genes significantly up-regulated in IFN- $\alpha$  experiments were included in the  
522 ISG class, while those that did not were put into the non-ISG class. However, there is also  
523 another group of human genes down-regulated in the presence of IFN- $\alpha$ , i.e., the IRGs. They  
524 were labelled as the non-ISGs, but contain unique patterns that constitute an important aspect  
525 of the IFN response [3]. Some of these IRGs were not up-regulated in any known type I IFN

526 systems, thus have been placed in a refined non-ISG class for analyses and predictions.  
527 Additionally, there are a number of genes that have insufficient levels of expression in the  
528 experiments to determine a fold change, i.e., ELGs. Here, we used the previously defined  
529 features to compare the ISGs from dataset S2 with the IRGs and ELGs divided from the  
530 background dataset S1 (**Table 5**).

531 As shown in **Figure 11**, the IRGs are differentially represented to a lower extent in the  
532 majority of nucleotide 4-mer compositions than the ISGs, indicating the deficiency of some  
533 nucleotide sequence patterns in the coding region of IRGs. Note that, many nucleotide 4-mer  
534 composition features are more suppressed in the ISGs than non-ISGs although the differences  
535 are small. The biased representation of these features in the IRGs suggests that the IRGs have  
536 characteristics similar to the ISGs rather than non-ISGs. Additionally, there are a very limited  
537 number of features relating to evolutionary conservation, nucleotide compositions or codon  
538 usages showing obvious differences between the ISGs and IRGs, but many of them are  
539 differentially represented when comparing the ISGs with non-ISGs. Therefore, involving the  
540 IRGs in the class of the non-ISGs will increase the risk for machine learning models to produce  
541 more false positives. However, there are some informative features differentiating the IRGs  
542 from ISGs. For example, comparing with the ISGs, the IRGs are more enriched in CpGs  
543 (Mann-Whitney U test:  $p = 5.6E-03$ ), which is also mentioned in [59]. The IRGs tend to have  
544 higher closeness centrality and neighbourhood connectivity than the ISGs (Mann-Whitney U  
545 test:  $p = 0.04$  and  $6.4E-06$  respectively), suggesting that the IRGs are closer to the centre of the  
546 human PPI network and connected to key proteins with many interaction partners. Differences  
547 in some amino acid composition features between the ISGs and IRGs can also be observed in  
548 **Figure 11**. Therefore, good predictability is still expected when using features extracted from  
549 proteins sequences.

550 **Figure 11** also illustrates 161 features showing significant differences (Mann-Whitney  
551 U tests:  $p < 0.05$ ) in the representation of the ISGs and ELGs. An estimated 82% of these  
552 features were also differentially represented between the ISGs and non-ISGs. 79% of these  
553 significant features displayed similar over-representation or under-representation in two  
554 comparisons, i.e., ISGs versus ELGs and ISGs versus non-ISGs. These ratios indicate that the  
555 majority of the ELGs are less likely to be ISGs based on their feature profile as well as their  
556 low expression levels in cells induced with IFN- $\alpha$ . Network analyses showed that the ELG  
557 products tended to have lower values of all calculated network features with the exception of  
558 topological coefficient than ISG products. It means that the ELG products are less connected  
559 by other human proteins in the human PPI network. Particularly, their abnormal representation  
560 on the feature of average shortest paths indicating that some ELGs (e.g. vascular cell adhesion  
561 molecule 1 (VCAM1) and ubiquitin D (UBD)) may still have high connectivity in the human  
562 PPI network.

563

564 **Figure 11. Differential expressions of parametric features between different genes and**  
565 **their coded proteins.** Mann-Whitney U tests are applied for hypothesis testing and the results  
566 were provided in the **Supplementary Data S2**. Here, the ISGs and non-ISGs are taken from  
567 dataset S2; the IRGs and ELGs are taken from dataset S4 and dataset S8 (subsets of dataset  
568 S1); the background human genes are from dataset S1 (**Table 5**).

569

### 570 **Implementation with machine learning framework**

571 In this study, we encoded 397 parametric and 7046 non-parametric features for the analyses.  
572 As an excess of features will greatly increase the dimension of feature spaces and complicate  
573 the classification task for the support vector machine (SVM) [60], we limited the number of  
574 SLNPs to the top 100 based on the adjusted p-value and we expected these to be sufficient to

575 provide a picture of short linear sequence patterns in the coding region of the canonical  
576 transcript. Accordingly, features measuring the co-occurrence status of multiple SLNPs were  
577 recalculated based on the selected 100 SLNPs. To reduce the impact of noisy data toward  
578 classifications, we only used the refined ISGs and non-ISGs from dataset S2 in machine  
579 learning.

580 Measured by sensitivity (SN), specificity (SP), Matthews correlation coefficient (MCC)  
581 [61] and area under the receiver operating characteristic curve (AUC), the initial prediction  
582 results shown in **Table 3** indicate that proteome-based features, including those deciphered  
583 from protein sequences and the human interactome, perform much better than genome-based  
584 features presumably due to overfitting of the model [62]. Using parametric features that took  
585 the advantage of both genetic and proteomic aspects showed a good improvement in tests. The  
586 non-parametric features used in this study gave a binary statement for the occurrence of short  
587 linear sequence patterns in genetic and proteomic sequences but seemed not to perform well  
588 and disrupted the model when they were combined with parametric features. The results shown  
589 in the previous analyses also indicate that there are a considerable number of disruptive features  
590 hidden in the set (e.g., **Figure 4**, **Figure 6**, and **Figure 8**). The similar attributes of the ISGs  
591 and IRGs (shown in **Figure 11**) led to lots of noisy data biasing the classifiers. This situation  
592 was not ameliorated and became more difficult when using other machine learning algorithms  
593 such as k-nearest neighbors (KNN), decision tree (DT), random forest (RF) (**Table 3**) [63,64].  
594 As some genes respond to IFNs in a cell-specific manner [2], it is hard to produce predictions  
595 unless we detect key discriminating features, which are robust to the change of biological  
596 environment.

597 Considering these drawbacks, we designed an AUC-driven subtractive iteration  
598 algorithm (ASI) (**Figure 15**) to remove as many disruptive features as possible (**Figure 12A**).  
599 Pre-processing using the ASI algorithm showed that there were at least 28% of features

600 disrupting the prediction model. They included 34% of features on codon usages and 50% of  
601 SLNP/SLAAP features, thus, explaining the poor performance of the model trained with non-  
602 parametric features (**Table 3**). However, the loss of some of the individual nucleotide 4-mer  
603 feature seemed not to influence the performance of the classifier at this stage, but the  
604 similarities between IRGs and ISGs (**Figure 11**) particularly in these 4-mer features was a  
605 cause for concern when the model was used to predict new data especially unknown IRGs.

606         When using the ASI algorithm, the number of disrupting features did not stabilise until  
607 the algorithm reached the 11-th iterations. The remaining 74 features constituted our optimum  
608 feature set for predicting the ISGs (**Table 4**). Among them, 14 and 9 features displayed positive  
609 and negative correlations with the level of up-regulation in IFN- $\alpha$  experiments. During the  
610 procedure, the AUC kept increasing steadily and reached 0.7479 at the end. The MCC also  
611 showed an overall improvement although it fluctuated slightly during the last few iterations.  
612 By degressively ranking the score calculated by the prediction model, we found 68.1% of the  
613 496 genes (equal to the number of ISGs in the training dataset) were successfully predicted as  
614 the ISGs. **Figure 12B** illustrates the distribution of prediction scores generated by the ASI-  
615 optimised model for human genes with different expressions in IFN- $\alpha$  experiments. Human  
616 genes with higher up-regulation in IFN- $\alpha$  experiments tend to obtain higher prediction score  
617 from our optimised machine learning model (PCC = 0.243,  $p = 4.2E-10$ ).

618         However, there were also some ISGs incorrectly predicted by our model even though  
619 they were highly up-regulated, for example, basic leucine zipper ATF-like transcription factor  
620 2 (BATF2, prediction score = 0.34). The model produced 33 ISGs with a prediction score  
621 higher than 0.8 but this number for the non-ISGs reduced to six, including one IRG (tripartite  
622 motif containing 59 (TRIM59)). The highest prediction score within the non-ISGs was found  
623 on ubiquitin conjugating enzyme E2 R2 (UBE2R2, prediction score = 0.88). It contains many  
624 features similar to the ISGs but was not differentially expressed in the presence of IFN- $\alpha$  in the

625 human fibroblast cells [3]. The lowest prediction score within ISGs was found on cap  
626 methyltransferase 1 (CMTR1, prediction score = 0.12) due to the weak signal from its features.  
627 For instance, CMTR1 protein does not contain any ISG-favoured SLAAPs listed in **Table 1**.  
628 The influence of the IRGs on the prediction was reflected in the training dataset but was not  
629 significant. Compared with human genes not differentially expressed in the IFN- $\alpha$  experiments  
630 (non-ISGs but not IRGs), there were slightly more IRGs unsuccessfully classified when using  
631 a threshold of 0.549 (Pearson's chi-squared tests:  $M_1 = 27\%$ ,  $M_2 = 24\%$ ,  $p > 0.05$ ).

632

633 **Table 3. Performance of different feature combinations on the training dataset S2' via**  
634 **five-fold cross-validation.**

| Method           | Features       | Number           | Threshold-dependent |                        |             |             | Threshold-independent |                     |               |
|------------------|----------------|------------------|---------------------|------------------------|-------------|-------------|-----------------------|---------------------|---------------|
|                  |                |                  | Score range         | Threshold <sup>a</sup> | SN          | SP          | MCC                   | SN_496 <sup>b</sup> | AUC           |
| SVM              | Genetic        | 452              | 0.359–0.623         | 0.402                  | 0.769       | 0.355       | 0.169                 | 0.579               | 0.6058        |
| SVM              | Proteomic      | 66               | 0.261–0.730         | 0.560                  | 0.425       | 0.778       | 0.218                 | 0.605               | 0.6360        |
| SVM              | Parametric     | 397              | 0.305–0.760         | 0.529                  | 0.595       | 0.665       | 0.261                 | 0.621               | 0.6573        |
| SVM              | Non-parametric | 121              | 0.368–0.605         | 0.487                  | 0.653       | 0.504       | 0.159                 | 0.573               | 0.5736        |
| SVM              | All            | 518              | 0.328–0.743         | 0.542                  | 0.567       | 0.681       | 0.250                 | 0.615               | 0.6509        |
| KNN <sup>c</sup> | All            | 518              | 0.100–0.900         | 0.500–0.550            | 0.593       | 0.621       | 0.214                 | 0.607±0.014         | 0.6305        |
| DT               | Partial        | 182 <sup>d</sup> | 0 or 1              | N/A                    | 0.546       | 0.548       | 0.095                 | 0.546               | N/A           |
| RF <sup>e</sup>  | Random         | Random           | 0.080–0.900         | 0.380–0.579            | 0.590±0.168 | 0.617±0.183 | 0.219±0.019           | 0.600±0.007         | 0.6413±0.0082 |
| SVM              | Optimum        | 74               | 0.098–0.918         | 0.549                  | 0.623       | 0.750       | 0.376                 | 0.681               | 0.7479        |

635 *a: this threshold is provided by maximum the value of MCC;*

636 *b: this sensitivity is measured among tested genes with the top 496 prediction probabilities;*

637 *c: k-value here is set as the square root of the size of the training samples in five-fold cross validation, i.e., k =*  
638 *20 [65];*

639 *d: 182 out of the 518 features (Supplementary Data S5) are used for decisions during this modelling procedure*  
640 *as the rest ones are not helpful to better split the dataset for lower system entropy [66];*

641 *e: this random forest algorithm uses 50 random grown trees and the modelling and validation procedures are*  
642 *repeated for 10 times.*

643

644 **Figure 12. The optimisation on the machine learning model with the ASI algorithm.** (A)

645 shows the change of the prediction models based on the one generated with all 518 features

646 (disruptive feature vector = 144, best MCC = 0.250, SN<sub>496</sub> = 0.615, and AUC = 0.6509). (B)

647 shows the distribution of prediction scores generated by the ASI-optimised model for human

648 genes with different expression levels in the IFN- $\alpha$  system. The ISGs and non-ISGs shown in

649 (B) are randomly selected through an undersampling strategy [67] on dataset S2. The list of

650 gene names can be found in **Supplementary Data S1**.

651

652 **Table 4. The optimum 74 features contributing to predicting the ISGs.**

| <b>Evolutionary features (2)</b>                                                            |                                           |                                          |
|---------------------------------------------------------------------------------------------|-------------------------------------------|------------------------------------------|
| Number of human paralogues <sup>P</sup> , average dS within human paralogues <sup>P</sup> . |                                           |                                          |
| <b>Codon usage features (10)</b>                                                            |                                           |                                          |
| Codon usage: CTA (L) <sup>P+</sup>                                                          | Codon usage: ATT (I) <sup>P</sup>         | Codon usage: TAT (Y) <sup>P</sup>        |
| Codon usage: GCG (A) <sup>P-</sup>                                                          | Codon usage: CAC (H) <sup>P-</sup>        | Codon usage: TGC (C) <sup>P</sup>        |
| Codon usage: CGT (R) <sup>P</sup>                                                           | Codon usage: CGA (R) <sup>P</sup>         | Codon usage: CGG (R) <sup>P-</sup>       |
| Codon usage: AGA (R) <sup>P+</sup>                                                          |                                           |                                          |
| <b>Genetic composition features (40)</b>                                                    |                                           |                                          |
| DNA AC content <sup>P</sup>                                                                 | Dinucleotide CpT composition <sup>P</sup> | DNA 4-mer CGCG composition <sup>P-</sup> |
| DNA 4-mer AATC composition <sup>P+</sup>                                                    | DNA 4-mer TCGT composition <sup>P</sup>   | DNA 4-mer GATG composition <sup>P+</sup> |
| DNA 4-mer AACA composition <sup>P</sup>                                                     | DNA 4-mer TGAG composition <sup>P+</sup>  | DNA 4-mer GACC composition <sup>P</sup>  |
| DNA 4-mer ATAT composition <sup>P</sup>                                                     | DNA 4-mer TGTA composition <sup>P</sup>   | DNA 4-mer GACG composition <sup>P</sup>  |
| DNA 4-mer ATGT composition <sup>P+</sup>                                                    | DNA 4-mer CACG composition <sup>P</sup>   | DNA 4-mer GAGT composition <sup>P+</sup> |
| DNA 4-mer ACAC composition <sup>P</sup>                                                     | DNA 4-mer CTCC composition <sup>P</sup>   | DNA 4-mer GTAC composition <sup>P</sup>  |
| DNA 4-mer ACTA composition <sup>P</sup>                                                     | DNA 4-mer CCAC composition <sup>P</sup>   | DNA 4-mer GTGT composition <sup>P</sup>  |
| DNA 4-mer ACTC composition <sup>P</sup>                                                     | DNA 4-mer CCTA composition <sup>P</sup>   | DNA 4-mer GTGC composition <sup>P</sup>  |
| DNA 4-mer ACCG composition <sup>P</sup>                                                     | DNA 4-mer CCTC composition <sup>P+</sup>  | DNA 4-mer GTGG composition <sup>P</sup>  |
| DNA 4-mer TATG composition <sup>P</sup>                                                     | DNA 4-mer CCGT composition <sup>P</sup>   | DNA 4-mer GCAA composition <sup>P+</sup> |

|                                         |                                         |                                         |
|-----------------------------------------|-----------------------------------------|-----------------------------------------|
| DNA 4-mer TTCT composition <sup>P</sup> | DNA 4-mer CGAG composition <sup>P</sup> | DNA 4-mer GCTC composition <sup>P</sup> |
| DNA 4-mer TTCG composition <sup>P</sup> | DNA 4-mer CGTG composition <sup>P</sup> | DNA 4-mer GCCT composition <sup>P</sup> |
| DNA 4-mer TTGA composition <sup>P</sup> | DNA 4-mer CGCA composition <sup>P</sup> | DNA 4-mer GGGG composition <sup>P</sup> |
| DNA 4-mer TCAT composition <sup>P</sup> |                                         |                                         |

---

### Proteomic composition features (9)

Arginine composition<sup>P</sup>, cysteine composition<sup>P+</sup>, methionine composition<sup>P</sup>;  
 Basic amino acid composition (R/H/K)<sup>P+</sup>                      Sulfur amino acid composition (C&M)<sup>P+</sup>  
 Hydroxyl amino acid composition (S&T)<sup>P-</sup>                      Small amino acid composition (N/D/C/P/T)<sup>P-</sup>  
 Large amino acid composition (R/I/L/K/M)<sup>P+</sup>  
 Uncharged amino acid composition (A/N/C/Q/G/I/L/M/F/P/S/T/W/Y/V)<sup>P-</sup>  
 Features about human interactome network (3)  
 Average shortest paths<sup>P+</sup>, betweenness<sup>P</sup>, neighborhood connectivity<sup>P-</sup>.

---

### Sequence pattern features (8)

|                                |                                      |                             |
|--------------------------------|--------------------------------------|-----------------------------|
| SLNP: ATA[AG][TG] <sup>N</sup> | SLNP: TAT[AT]T <sup>N</sup>          | SLNP: T[AT]AAA <sup>N</sup> |
| SLNP: [ATG]TGTA <sup>N</sup>   | SLAAP: SxNxEx <sup>N</sup>           | SLAAP: ENE <sup>N</sup>     |
| SLAAP: SVI <sup>N</sup>        | Co-occurrence of SLAAPs <sup>P</sup> |                             |

653 *P*: parametric features;

654 *N*: non-parametric features;

655 '+' symbol means features are positively associated with the level of up-regulation in IFN- $\alpha$  experiments ( $p <$   
 656  $0.05$ );

657 '-' symbol means features are negatively associated with the level of up-regulation in IFN- $\alpha$  experiments ( $p <$   
 658  $0.05$ ).

659

### 660 Review of different testing datasets

661 In this study, we trained and optimised a SVM model from our training dataset S2', and  
 662 prepared seven testing datasets (dataset S2''/S3/S4/S5/S6/S7/S8) to assess the generalisation  
 663 capability of our model under different conditions (**Table 5**). The S2'' testing dataset was a  
 664 subset of dataset S2. The prediction performance on this testing dataset was close to that in the  
 665 training stage with an AUC of 0.7455 (**Figure 13A**). The best MCC value (0.345) was achieved



666 when setting the judgement threshold to 0.438, which meant that the prediction model was  
667 sensitive to signals related to ISGs. In this case, it performed predictions with high sensitivity  
668 but inevitably produced many false positives, especially within IRGs.

669 In the S3 testing dataset, we used 695 ISGs with low confidence. The overall accuracy  
670 (equals to SN as there were no negatives) only reached 44.0% when using a judgement  
671 threshold of 0.549, about 0.18 lower than SN under the same threshold in the training dataset  
672 S2' (**Table 3**). It is expected as some of their inherent attributes make them slightly up-  
673 regulated, silent or even repressed (e.g., become non-ISGs in other IFN systems) in response  
674 to some IFN-triggered signalling. On this testing dataset, our machine learning model produced  
675 38 (5.5%) ISGs with a prediction score higher than 0.8. This number was also lower than that  
676 on the training dataset S2'. It further indicates the relatively low confidence for the ISGs  
677 included in dataset S3.

678 The S4 testing dataset was constructed to illustrate our hypothesis that there are some  
679 patterns shared among the ISGs and IRGs at least in the IFN- $\alpha$  system in the human fibroblast  
680 cells. On this testing dataset, the prediction accuracy (equals to SP as there were no positives)  
681 was 60.2% under the judgement threshold of 0.549, about 0.15 lower than the SP under the  
682 same threshold in the training dataset S2' (**Table 3**). Leucine rich repeat containing 2 (LRRC2),  
683 carbohydrate sulfotransferase 10 (CHST10) and eukaryotic translation elongation factor 1  
684 epsilon 1 (EEF1E1) showed strong signals of being ISGs (probability score > 0.9). In total,  
685 there were 56 (5.6%) IRGs being incorrectly predicted as the ISGs with prediction scores  
686 higher than 0.8. This high score was found in an estimated 8.1% of the ISGs but was only  
687 observed in 1.2% of human genes not differentially expressed in the IFN- $\alpha$  experiments  
688 (**Figure 12B**). These results indicate that there is a considerable number of IRGs incorrectly  
689 predicted as ISGs in the S4 testing dataset due to their close distance to the ISGs in the high-  
690 dimensional feature space. This may be the case for many other datasets including dataset S2'',

691 S5, S6, S7, and S8. It also supports our hypothesis about the shared patterns from the machine  
692 learning aspect and is consistent with the results shown in **Figure 11**.

693 The next three testing datasets (S5, S6, and S7) were collected from the Interferome  
694 database [24] to test the applicability of the machine learning model across different IFN types.  
695 The ISGs in these testing datasets were all highly up-regulated ( $\text{Log}_2(\text{Fold Change}) > 1.0$ ) in  
696 the corresponding IFN systems while all the non-ISGs were not up-regulated after  
697 corresponding IFN treatments ( $\text{Log}_2(\text{Fold Change}) < 0$ ). The results shown in **Figure 13**  
698 reveals that the ISGs triggered by type I or III IFN signalling can still be predicted by our  
699 machine learning model, but the performance is limited to some extents ( $\text{AUC} = 0.6677$  and  
700  $0.6754$  respectively). However, it is almost impossible to make normal predictions with the  
701 current feature space for human genes up-regulated by type II IFNs ( $\text{AUC} = 0.5532$ ).

702

703 **Figure 13. The performance of our optimised model on different datasets.** (A) and (B)  
704 illustrate the AUC and best MCC. S2' is the training dataset used in this study. It randomly  
705 includes 496 ISGs and an equal number of non-ISGs from dataset S2 that contains ISGs/non-  
706 ISGs with high confidence (**Table 5**). Evaluation on this dataset in (A) is processed via five-  
707 fold cross validation. S2'' is the testing dataset constructed with the remaining human genes in  
708 dataset S2. S5, S6, and S7 are collected from the Interferome database [24], including human  
709 genes with different responses to the type I, II and III IFNs, respectively. The label and usage  
710 of these human genes are provided in **Supplementary Data S1**.

711

712 The S8 testing dataset consisted of 2217 human genes that were insufficiently expressed  
713 in IFN- $\alpha$  experiments in the human fibroblast cells [3]. The results showed that there were  
714 around 41.2% ELGs being predicted as the ISGs when using a judgement threshold of 0.549.  
715 This was approximately 0.21 lower than the SN under the same threshold in the training dataset

716 S2' (**Table 3**). It suggests that there are more non-ISGs than ISGs in this dataset, which is  
717 consistent with the results shown in **Figure 11**. Particularly, we found ten ELGs with prediction  
718 scores higher than 0.9: CD48 molecule, CD53 molecule, lipocalin 2 (LCN2), uncoupling  
719 protein 1 (UCP1), coiled-coil domain containing 68 (CCDC68), potassium calcium-activated  
720 channel subfamily M regulatory beta subunit 2 (KCNMB2), potassium voltage-gated channel  
721 interacting protein 4 (KCNIP4), zinc finger HIT-type containing 3 (ZNHIT3), serpin family B  
722 member 4 (SERPINB4), and fibrinogen silencer binding protein (FSBP). By retrieving data  
723 from the Genotype-Tissue Expression project [68], we found that the expression of these ELGs  
724 were generally limited with the exception of CD53 and ZNHIT3 (**Figure 14**). The expression  
725 data of CD53 were not included in the OCISG database [3] and were also limited in the  
726 Interferome database [24]. It only showed slight up-regulation after type I IFN treatments in  
727 blood, liver, and brain but there is currently no record of its expression level in the presence of  
728 IFN- $\alpha$  in the human fibroblast cells. ZNHIT3 is another well-expressed gene lacking  
729 information in the OCISG. In the Interferome database [24], we found that ZNHIT3 could be  
730 up-regulated after IFN treatments in some fibroblast cells on skin. As for the remaining eight  
731 ELGs, despite their limited expression in the human fibroblast cells, their features suggest that  
732 they are very likely to be IFN- $\alpha$  stimulated in a currently untested cell type.

733

734 **Figure 14. Expression of the ELGs in different tissues.** Expression data for ten ELGs are  
735 collected from the Genotype-Tissue Expression project (<https://gtexportal.org/>) [68]. The  
736 tissues in red are not included in the Interferome database [24]. White boxes in the heatmap  
737 indicate that there is no data available for genes in the corresponding tissues. The overall  
738 expression level of these ten ELGs are reflected via human perspective photo retrieved from  
739 Expression Atlas (<https://www.ebi.ac.uk/gxa>) [69].

740

741

## 742 **Discussion**

743 In this study, we investigated the characteristics that influence the expression of human genes  
744 in IFN- $\alpha$  experiments. We compared the ISGs and non-ISGs through multiple procedures to  
745 guarantee strong signals for the ISGs and to avoid cell-specific influences that resulted in the  
746 lack of the ISGs expression in certain cell types [2]. Even some highly up-regulated ISGs can  
747 become down-regulated when the biological conditions change, exemplified by the  
748 performance of C-X-C motif chemokine ligand 10 (CXCL10) on liver biopsies after IFN- $\alpha$   
749 treatment. This refinement is necessary as the representation of features between the ISGs and  
750 background human genes show that many non-ISGs especially IRGs have similar feature  
751 patterns to the ISGs (**Figure 11**).

752 Generally, the ISGs are less evolutionarily conserved with more human paralogues than  
753 the non-ISGs. They have specific nucleotide patterns exemplified by the depletion of GC-  
754 content and have a unique codon usage preference in coding proteins. There are a number of  
755 SLNPs widely observed in the cDNA of the ISGs which are relatively rare in the non-ISGs  
756 (**Supplementary Data S4**). Likewise, there are also many SLAAPs highlighted in the  
757 sequences of ISG products that are absent or rare in the non-ISG products (**Table 1**). In the  
758 human PPI network, the ISG products tend to have higher betweenness than the background  
759 human protein, indicating their more frequent interruption of the shortest path (geodesic  
760 distance) between different nodes. Abnormal expression or knockout of these proteins will  
761 increase the diameter of the network and may lead to some lethal consequences that are not  
762 tolerated in signalling pathways [70-72]. These ISG specific patterns may be the result of the  
763 evolution of the innate immune system in vertebrates and could be adaptations to the cellular  
764 environment induced by interferon following a pathogenic infection [73]. It is also possible  
765 that some of the particular SLNPs and SLAAPs may be functionally important as the cell

766 changes from non-infected to infected. Experimental evidence will be necessary to investigate  
767 this.

768         Some inherent properties of the ISGs facilitate or elevate their expression after IFN- $\alpha$   
769 treatments but may also be used by viruses to escape from IFN- $\alpha$ -mediated antiviral response  
770 [22]. For instance, the representation of dN showed a more significant difference than that of  
771 dS within human paralogues. We found that higher dN/dS ratio was positively correlated with  
772 gene up-regulation following IFN- $\alpha$  treatments (**Figure 9**). It means the gene is less conserved  
773 with more non-synonymous or nonsense mutations, which can often be associated to inherited  
774 diseases and cancer [74]. It will also facilitate the virus to interfere with IFN- $\alpha$  signalling  
775 through the JAK-STAT pathway and inactivate downstream cellular factors involved in IFN-  
776  $\alpha$  signal transductions [22]. We found arginine was under-represented in the ISG products  
777 compared to the non-ISG products. As arginine is essential for the normal proliferation and  
778 maturation of human T cells [75], such depletion in the ISG products may leave a risk of  
779 inhibiting T- cell function and potentially increased susceptibility to infections [76].  
780 Furthermore, the special pattern of the ISGs also promotes the representation of some features  
781 even if they are not well represented in nature, for example, the higher cysteine composition in  
782 the ISGs. We hypothesize that it may be helpful to activate T-cell to regulate protein synthesis,  
783 proliferation and secretion of immunoregulatory cytokines [77,78]. There are also some  
784 features (e.g. methionine composition) not differentially represented between the ISGs and  
785 non-ISGs but play important roles in IFN- $\alpha$ -mediated immune responses. For example, there  
786 is evidence for the methionine content playing a role in the biosynthesis of S-  
787 Adenosylmethionine (SAM), which can improve interferon signalling in cell culture [79,80].

788         As previously mentioned, there were similar patterns between the feature representation  
789 of the ISGs and IRGs, which led to the unclear boundary for the ISGs and non-ISGs in the  
790 feature space. We found significant differences on the representation of features on

791 evolutionary conservation (**Figure 3**) between the ISGs and non-ISGs, but they became non-  
792 significant when comparing the ISGs with IRGs. Similar phenomena were observed on many  
793 features deciphered from the canonical transcript, e.g., dinucleotide composition and codon  
794 usage features. We suggest that the IRGs can be viewed as additional ISGs as they also regulate  
795 the activity of human genes in response to IFNs, only negatively. Furthermore, despite so many  
796 similarities between the ISGs and IRGs, the separate classification of these genes is still  
797 possible. 4-mer compositions can be considered as the key features as most of them are  
798 differentially represented between ISGs and IRGs (**Figure 11**). Using proteomic features can  
799 also help to differentiate the ISGs from IRGs but is not as good as using 4-mer features.

800 In the machine learning framework, we developed the ASI algorithm to remove  
801 disruptive features but kept features not influencing the prediction performance when being  
802 removed individually during iterations. Features might have synergistic effects thus the  
803 elimination of each feature left a different impact on the remaining ones even if these were  
804 individually useless for the improvement of the classifier. In this case, keeping as many useful  
805 features as possible seems to be a good option but will greatly increase the dimension of the  
806 feature space and increase the risk of overfitting [62]. By contrast, our ASI algorithm avoided  
807 such a risk and kept the synergistic effect of different features through iterations.

808 In the prediction task, we found some previously labelled non-ISGs with very high  
809 prediction scores, suggesting that they had many inherent properties enabling them to be  
810 stimulated after IFN- $\alpha$  treatments. Some of them, for example, UBE2R2 has been shown to be  
811 significantly up-regulated after IFN- $\alpha$  treatment [81]. The non-ISG label was assigned because  
812 the relevant expression data in the presence of IFN- $\alpha$  were not included in the OCISG [3] and  
813 Interferome databases [24]. We also found ten ELGs with very high prediction scores ( $> 0.9$ ).  
814 Literature searches on these genes indicate that they are likely to be involved in the innate  
815 immune response [82,83]. Their responses may be limited to certain tissues or cell types for

816 which there is limited expression data in the Interferome database [24]. For example, LCN2  
817 has been shown to mediate an innate immune response to bacterial infections by sequestering  
818 iron [82] and is induced in the central nervous system of mice infected with West Nile virus  
819 encephalitis [84]. CD48 was shown to increase in levels in the context of human IFN- $\alpha/\beta/\gamma$   
820 stimulation [83]. Interestingly, CD48 is also the target of immune evasion by viruses [85] and  
821 has been captured in the genome of cytomegalovirus and undergone duplication [86]. Evidence  
822 for other ELGs is harder to assess, particularly those for which expression is absent in a range  
823 of tissues (e.g., UCP1 in **Figure 14**). UCP1 is a mitochondrial carrier protein expressed in  
824 brown adipose tissue (BAT) responsible for non-shivering thermogenesis [87]. It is possible  
825 that UCP1 is stimulated directly or indirectly by IFN- $\alpha$  in BAT, resulting in the defended  
826 elevation of body temperature in response to infection.

827         We developed the machine learning model based on experimental data from the human  
828 fibroblast cells stimulated by IFN- $\alpha$ . It can be generalised to type I or III IFN systems,  
829 presumably because activations of type I and III ISGs are both controlled by ISRE [9] and aim  
830 to regulate host immune response [10-12]. However, our model cannot be used for predictions  
831 in the type II IFN system (AUC = 0.5532, best MCC = 0.083, **Figure 13**) because of the  
832 different control element and the different role in human immune activities [14].

833         In summary, our analyses highlight some key sequence-based features that are helpful  
834 to distinguish the ISGs from non-ISGs or IRGs. Our machine learning model is able to produce  
835 a list of putative ISGs to support IFN-related research. As knowledge of the ISG functions  
836 continue to be elucidated by experimentalists, the *in-silico* approach applied here can in future  
837 be extended to classify the different functions of ISGs.

838

839

## 840 **Methods**

### 841 **Dataset curation**

842 In this study, we retrieved 2054 ISGs (up-regulated), 12379 non-ISGs (down-regulated or not  
843 differentially expressed), and 3944 unlabelled human genes (ELGs with less than one count  
844 per million reads mapping across the three biological replicates [88,89]) from the OCISG  
845 database (<http://isg.data.cvr.ac.uk/>) [3]. Gene clusters in the OCISG database were built  
846 through Ensembl Compara [90], which provided a thorough account of gene orthology based  
847 on whole genomes available in Ensembl [58]. Labels of these human genes were defined based  
848 on the fold change and a false discovery rate (FDR) following the IFN- $\alpha$  treatments in the  
849 human fibroblast cells. We searched the collected 18377 entries against the RefSeq database  
850 (<https://www.ncbi.nlm.nih.gov/refseq/>) [32] to decipher features based on appropriate  
851 transcripts (canonical) [91] coding for the main functional isoforms of these human genes. It  
852 produced 1315, 7304, and 2217 results for the ISGs, non-ISGs and ELGs, respectively. These  
853 10836 human genes were well-annotated by multiple online databases and were used as the  
854 background dataset S1 in the analyses.

855 For the purpose of generating a set of human genes with high confidence of being up-  
856 regulated and non-up-regulated in response to the IFN- $\alpha$ , we searched the recompiled 8619  
857 human genes (ISGs or non-ISGs) against Interferome (<http://www.interferome.org/>) [24]. We  
858 filtered out the ISGs without high up-regulation ( $\text{Log}_2(\text{Fold Change}) > 1.0$ ) or with obvious  
859 down-regulation ( $\text{Log}_2(\text{Fold Change}) < -1.0$ ) in the presence of type I IFNs. This procedure  
860 guaranteed a refined ISG dataset with strong levels of stimulation induced by any type I IFNs  
861 and reduced biases driven by the IRGs for the analyses and predictions. We filtered out the  
862 non-ISGs showing enhanced expression after type I IFN treatments ( $\text{Log}_2(\text{Fold Change}) > 0$ ).  
863 The exclusion of these non-ISGs could effectively reduce the risk of involving false negatives



864 in analyses and producing false positives in predictions. As a result, the refined dataset S2  
 865 contains 620 ISGs and 874 non-ISGs with relatively high confidence.

866 The training procedure in the machine learning framework was conducted on the  
 867 balanced dataset S2'. It consisted of 992 randomly selected ISGs and non-ISGs from dataset  
 868 S2. The remaining human genes in S2 were used for independent testing. Additionally, we also  
 869 constructed another six testing datasets for the purpose of review and assessment. Dataset S3  
 870 contained 695 ISGs with low confidence compared to those ISGs in dataset S2. Some of them  
 871 could be non-ISGs or even IRGs in the type I IFN system. Dataset S4 contained 1006 IRGs  
 872 from the human fibroblast cell experiments. Dataset S5, S6, and S7 were constructed based on  
 873 records for experiments in type I, II, and III IFN systems from Interferome [24]. The criterion  
 874 for an ISG in the latter three datasets was a high level of up-regulation ( $\text{Log}_2(\text{Fold Change}) >$   
 875  $1.0$ ) while that for non-ISGs was no up-regulation after IFN treatments ( $\text{Log}_2(\text{Fold Change}) <$   
 876  $0$ ). The last testing dataset S8 was derived from our background dataset S1, containing 2217  
 877 ELGs. A breakdown of the aforementioned eight datasets is shown in **Table 5**. Detailed  
 878 information of the human genes used in this study is provided in **Supplementary Data S1**.  
 879 The cDNA and protein sequences are accessible at <http://isgpre.cvr.gla.ac.uk/>.

880

881 **Table 5. A breakdown of datasets used in this study.**

| Dataset | Brief description                       | IFN system                        | ISGs | Non-ISGs | ELGs |
|---------|-----------------------------------------|-----------------------------------|------|----------|------|
| S1      | Well-annotated human genes (background) | IFN- $\alpha$ in fibroblast cells | 1315 | 7304     | 2217 |
| S2      | Refined dataset with high confidence    | IFN- $\alpha$ in fibroblast cells | 620  | 874      | 0    |
| S2'     | Training subset of S2                   | IFN- $\alpha$ in fibroblast cells | 496  | 496      | 0    |
| S2''    | Testing subset of S2                    | IFN- $\alpha$ in fibroblast cells | 124  | 378      | 0    |
| S3      | ISGs with low confidence in S1          | IFN- $\alpha$ in fibroblast cells | 695  | 0        | 0    |
| S4      | IRGs divided from S1                    | IFN- $\alpha$ in fibroblast cells | 0    | 1006     | 0    |
| S5      | ISGs from Interferome [24]              | Type I IFNs in all cells          | 1259 | 872      | 0    |

|    |                            |                                   |      |      |      |
|----|----------------------------|-----------------------------------|------|------|------|
| S6 | ISGs from Interferome [24] | Type II IFN in all cells          | 2229 | 755  | 0    |
| S7 | ISGs from Interferome [24] | Type III IFN in all cells         | 33   | 1683 | 0    |
| S8 | ELGs divided from S1       | IFN- $\alpha$ in fibroblast cells | 0    | 0    | 2217 |

---

882

### 883 **Generation of parametric features**

884 We encoded 397 parametric features from aspects of evolution, nucleotide composition,  
885 transcription, amino acid composition, and network preference. Original values of these  
886 features for our compiled 10836 human genes are accessible at <http://isgpre.cvr.gla.ac.uk/>.

887 From the perspective of evolution, we used the number of transcripts, open reading  
888 frames (ORFs) and count of exons used for coding to quantify the alternative splicing process.  
889 Genes with more transcripts and ORFs have higher alternative splicing diversity to produce  
890 proteins with similar or different biological functions [33,92,93]. Frequent use of protein-  
891 coding exons indicates more complex alternative splicing products [94]. Here, duplication and  
892 mutation features were measured by the number of within species paralogues and substitutions  
893 [34,35]. These data were collected from BioMart [58] to assess the selection on protein  
894 sequences and mutational processes affecting the human genome [95].

895 From the perspective of nucleotide composition, we calculated the percent of adenine,  
896 thymine, cytosine, guanine, and their four-category combinations in the coding region of the  
897 canonical transcript. The first category measured the proportion of two different nitrogenous  
898 bases out of the implied four bases, e.g., GC-content. The second category also focused on the  
899 combination of two nucleotides but added the impact of phosphodiester bonds along the 5' to  
900 3' direction, e.g., CpG-content [96]. The third category calculated the occurrence frequency of  
901 4-mers, e.g., 'CGCG' composition to involve some positional resolution [41]. The last category  
902 considered the co-occurrence of SLNPs. From the perspective of transcription, we calculated  
903 the usage of 61 coding codons and three stop codons in the coding region of the canonical  
904 transcripts. Codon usage biases are observed when there are multiple codons available for

905 coding one specific amino acid. They can affect the dynamics of translation thus regulate the  
906 efficiency of translation and even the folding of the proteins [40,97].

907 From the perspective of amino acid composition, we calculated the percentage of 20  
908 standard amino acids and their combinations based on their physicochemical properties [46].  
909 Patterns in the amino acid level are considered to have a direct impact on the establishment of  
910 biological functions or to reflect the result of strong purifying selection [47]. Based on the  
911 chemical properties of the side chain, we grouped amino acids into seven classes including  
912 aliphatic, aromatic, sulfur, hydroxyl, acidic, amide, and basic amino acids. We also grouped  
913 amino acids based on geometric volume, hydrophathy, charge status, and polarity, but found  
914 some overlaps among these features. For instance, amino acids with basic side chains are all  
915 positively charged. Aromatic amino acids all have large geometric volumes (volume > 180  
916 cubic angstroms). Likewise, we also considered the co-occurrence of short linear sequence  
917 patterns at the protein level. These co-occurring SLAAPs may relate to potential mechanisms  
918 regulating the expression of the ISGs [98].

919 When trying to measure the network preference for the gene products, we constructed  
920 a human PPI network based on 332,698 experimentally verified interactions (confidence score >  
921 0.63) from HIPPIE [55]. Nodes and edges of this network are provided at  
922 <http://isgpre.cvr.gla.ac.uk/>. Eight network-based features including the average shortest path,  
923 closeness, betweenness, stress, degree, neighbourhood connectivity, clustering coefficient, and  
924 topological coefficient were calculated from this network. Isolated nodes or proteins were not  
925 included in our network and were assigned zero value for all these eight features. The shortest  
926 path measures the average length of the shortest path between a focused node and others in the  
927 network. Closeness of a node is defined as the reciprocal of the length of the average shortest  
928 path. Proteins with a low value of the shortest paths or closeness are close to the centre of the  
929 network. Betweenness reflects the degree of control that one node exerted over the interactions

930 of other nodes in the network [99]. Stress of a node measures the number of shortest paths  
931 passing through it. Proteins with a high value of betweenness or stress are close to the  
932 bottleneck of the network. Degree of a node counts the number of edges linked to it while  
933 neighbourhood connectivity reflected the average degree of its neighbours. Proteins with high  
934 degree or neighbourhood connectivity are close to the hub of the network. They are considered  
935 to play an important role in the establishment of the stable structure of the human interactome  
936 [100]. Clustering and topological coefficient measure the possibility of a node to form clusters  
937 or topological structures with shared neighbours. The former coefficient can be used to identify  
938 the modular organisation of metabolic networks [101] while the latter one may be helpful to  
939 find out virus mimicry targets [53].

940

#### 941 **Generation of non-parametric features**

942 In this study, non-parametric features were used to check the occurrence of short linear  
943 sequence patterns in the genome and proteome. SLNPs constructed in this study contained  
944 three to five random nucleotides, producing 708,540 alternative choices. SLNPs with no  
945 restrictions on their first or last position were not taken into consideration as their patterns  
946 could be expressed in a more concise way. A SLNP was picked out to encode a binary feature  
947 when its occurrence level in the coding region of the canonical ISG transcripts was significantly  
948 higher than that for the non-ISGs (Pearson's chi-squared test:  $p < 0.05$ ). SLAAPs were  
949 constructed with three to four fixed amino acids separated by putative gaps. The gap could be  
950 occupied by at most one random amino acid, producing 1,312,000 alternative choices.  
951 Likewise, binary features were prepared for SLAAPs showing significant enrichment in the  
952 ISG products than in the non-ISG products (Pearson's chi-squared test:  $P < 0.05$ ). Since there  
953 were lots of results rejecting the null-hypothesis, we adopted the Benjamini-Hochberg  
954 correction procedure to avoid type I error [43]. Additionally, we also encoded two features to

955 check the co-occurrence or absence of multiple SLNPs and SLAAPs. This co-occurrence status  
 956 might be a better representation of functional sites composed of short stretches of adjacent  
 957 nucleobases or amino acids surrounding SLNPs or SLAAPs [47].

958

## 959 **Assessment of associations between feature representation and IFN-triggered** 960 **stimulations**

961 We obtained 8619 human genes with expression data from the OCISG database [3]. 4111 of  
 962 them were annotated with a positive  $\text{Log}_2(\text{Fold Change})$  ranging from 0 to 12.6, which meant  
 963 they were up-regulated after IFN- $\alpha$  treatments in the human fibroblast cells. In order to measure  
 964 the average level of feature representation (AREP) for genes with similar expression during  
 965 IFN stimulations, we introduced a 0.1-length sliding-window to divide the data into 126 bins  
 966 with different  $\text{Log}_2(\text{Fold Change})$ . Here, PCC was introduced to test the association between  
 967 the representation of parametric features and IFN- $\alpha$ -triggered stimulation ( $\text{Log}_2(\text{Fold Change}) >$   
 968 0). It can be formulated as:

$$PCC(f) = \frac{1}{n-1} \sum_{i=1}^n \left( \frac{LFC_i - M_0}{SD_0} \right) \times \left( \frac{AREP_i - M_f}{SD_f} \right) \quad (1)$$

969 where  $n$  is the number of divided parts that equals to 126 in this study;  $LFC_i$  and  $AREP_i$  are  
 970 the value of  $\text{Log}_2(\text{Fold Change})$  and AREP in the  $i$ -th part;  $M_0$  and  $SD_0$  are the mean and  
 971 standard deviation of  $\text{Log}_2(\text{Fold Change})$ , which is set as 6.4 and 3.7 respectively in this study;  
 972  $M_f$  and  $SD_f$  are the mean and standard deviation of 126 AREP that reflect the representation  
 973 of the considered feature. To make fair comparisons among features with different scales, we  
 974 normalised them based on the major value of their representations:

$$Norm(f) = \begin{cases} 1, f > UB(f) \\ \frac{f - LB(f)}{UB(f) - LB(f)}, LB(f) < f < UB(f) \\ 0, f < LB(f) \end{cases} \quad (2)$$

975 where  $LB(f)$  and  $UB(f)$  are the lower and upper bound representing the 5th and 95th  
976 percentile within representation values for the target feature. The representation of feature was  
977 considered to have a stronger positive/negative association with IFN- $\alpha$ -triggered stimulations  
978 if the PCC calculated from the normalised features was closer to 1.0/-1.0 and the p value  
979 calculated by the Student t-test was lower than 0.05.

980

### 981 **Machine learning and optimisation**

982 We designed a machine learning framework for the prediction of ISGs. Firstly, all features  
983 were encoded and normalised based on their major representations (**Equation 2**). Then we  
984 used an under-sampling procedure [67] to generate a balanced dataset from dataset S2 for  
985 training and modelling. SVM with radial basis function [60] was used as the basic classifier. It  
986 maps the normalised feature space to a higher dimension to generate a space plane to better  
987 classify the majority of positive and negative samples. Since there were usually lots of noisy  
988 data distributed in the feature space, it was necessary to remove disruptive features. This  
989 effectively reduced the dimensionality of the feature space and made it easier for the SVM  
990 model to generate a more appropriate classification plane that involved fewer false positives  
991 and false negatives. Here, we propose a subtractive iteration algorithm driven by the change of  
992 AUC to filter out disruptive features (**Figure 15**). In each iteration, we traversed the features  
993 and removed those that do not improve the AUC of the prediction results. Theoretically, this  
994 algorithm can greatly optimise the feature space and remove all disruptive features after  
995 multiple iterations. In the testing procedure, we encoded the optimum features for testing  
996 samples and place them in the optimised feature space. Samples with longer distance to the  
997 optimised classification plane indicated a stronger signal of being the ISGs or non-ISGs. They  
998 were more likely to get higher prediction scores (close to 0 or 1) from the SVM model.

999

1000 **Figure 15. The pseudo-code of the AUC-driven subtractive iteration algorithm.**

1001

### 1002 **Performance evaluation**

1003 In this study, the prediction results were evaluated with three threshold-dependent criteria  
1004 including SN, SP, and MCC [61] and two threshold-independent criteria: SN<sub>n</sub> and AUC. SN  
1005 and SP were used to assess the quality of the machine learning model in recognising ISGs and  
1006 non-ISGs respectively while MCC provided a comprehensive evaluation for both positives and  
1007 negatives. The number of 'n' in the SN<sub>n</sub> criterion was determined based on the number of  
1008 ISGs used for testing. It was used to measure the upper limit of the prediction model as well as  
1009 to check the existence of important false positives close to the class of ISGs from the  
1010 perspective of data expression. Finally, AUC was a widely used criterion to evaluate the  
1011 prediction ability of a binary classifier system. The group of interest was almost unpredictable  
1012 in a specific binary classifier system if the AUC of the classifier was close to 0.5.

1013

1014

### 1015 **Availability of source code and requirements**

- 1016 • Project name: ISGPRES
- 1017 • Project home page: <http://isgpre.cvr.gla.ac.uk/>
- 1018 • Operating system: mac OS
- 1019 • Programming language: Java
- 1020 • Other requirements: JDK 8+
- 1021 • License: GNU GPL v3
- 1022 • Any restrictions to use by non-academics: None
- 1023 • Documentation and tutorials: <https://github.com/HChai01/ISGPRES>

1024            Additionally, we have released all of our compiled data and calculated features at the  
1025 project home page and GitHub repository. They can be reused to conduct research relating to  
1026 IFN- $\alpha$  or type I/II/III IFNs.

1027

1028

## 1029 **Data Availability**

1030 The implemented web server and all reproduceable data are freely accessible at  
1031 <http://isgpre.cvr.gla.ac.uk/> and <https://github.com/HChai01/ISGPRE>.

1032

1033

## 1034 **Additional Files**

1035 **Supplementary Data S1. Basic information and usage of our compiled 10836 human**  
1036 **genes.**

1037 **Supplementary Data S2. The result of Mann-Whitney U tests for parametric features.**

1038 **Supplementary Data S3. Association between feature representations and IFN- $\alpha$**   
1039 **stimulations.**

1040 **Supplementary Data S4. The result of Pearson's chi-squared tests for sequence motifs.**

1041 **Supplementary Data S5. Decision trees generated during five-cross validation on the**  
1042 **training dataset S2'.**

1043

1044

## 1045 **Abbreviations**

1046 APC: anaphase promoting complex; AREP: average level of feature representation; ASI:  
1047 AUC-driven subtractive iteration algorithm; AUC: area under the receiver operating  
1048 characteristic curve; BAT: brown adipose tissue; BATF2: basic leucine zipper ATF-like



1049 transcription factor 2; BST2: bone marrow stromal cell antigen 2; CCDC68: coiled-coil domain  
1050 containing 68; cDNA: complementary DNA; CHST10: carbohydrate sulfotransferase 10;  
1051 CMTR1: cap methyltransferase 1; CXCL10: C-X-C motif chemokine ligand 10; dN: non-  
1052 synonymous substitutions per non-synonymous site; dS: synonymous substitutions per  
1053 synonymous site; DSP: desmoplakin; DT: decision tree; EEF1E1: eukaryotic translation  
1054 elongation factor 1 epsilon 1; ELAVL1: embryonic lethal, abnormal vision like RNA binding  
1055 protein 1; ELGs: human genes with limited expression in the IFN- $\alpha$  experiments; ESR2:  
1056 estrogen receptor 2; FDR: false discovery rate; FSBP: fibrinogen silencer binding protein; GAF:  
1057 IFN- $\gamma$  activation factor; GAS: gamma-activated sequence promoter elements; gBGC: GC-  
1058 biased gene conversion; HIPPIE: Human Integrated Protein-Protein Interaction rEference;  
1059 HMCN1: hemicentin 1; HPSE: ectopic expression of heparinase; IDRs: intrinsically disordered  
1060 regions; IFITM: interferon induced transmembrane proteins; IFNAR: interferon- $\alpha$  receptor;  
1061 IFNGR: IFN- $\gamma$  receptor; IFNLR1: IFN- $\lambda$  receptor 1; IFNs: interferons; IL-10R2: interleukin-  
1062 10 receptor 2; IRF9: interferon regulatory factor 9; IRG: interferon repressed (down-regulated)  
1063 human genes; ISG15: ISG15 ubiquitin like modifier; ISG20: interferon stimulated exonuclease  
1064 gene 20; ISGF3: interferon stimulated gene factor 3 complex; ISGs: interferon stimulated (up-  
1065 regulated) human genes; ISRE: interferon stimulated response elements; JAK1: Janus kinase  
1066 1; KCNIP4: potassium voltage-gated channel interacting protein 4; KCNMB2: potassium  
1067 calcium-activated channel subfamily M regulatory beta subunit 2; KNN: k-nearest neighbors;  
1068 LCN2: lipocalin 2; LRRC2: Leucine rich repeat containing 2; MCC: Matthews correlation  
1069 coefficient; MX: MX dynamin like GTPase proteins; non-ISGs, human genes not significantly  
1070 up-regulated by interferons; NTRK1: neurotrophic receptor tyrosine kinase 1; OCISG:  
1071 Orthologous Clusters of Interferon-stimulated Genes; ORF: open reading frame; PCC:  
1072 Pearson's correlation coefficient; PPI: protein-protein interaction; RefSeq: Reference  
1073 Sequence; RF: random forest; SAM: S-Adenosylmethionine; SERPINB4: serpin family B

1074 member 4; SLAAP: short linear amino acid pattern; SLNP: short linear nucleotide pattern; SN:  
1075 sensitivity; SP: specificity; STAT: signal transducer and activator of transcription; SVM:  
1076 support vector machine; TDRD6: tudor domain containing 6; TRIM25: tripartite motif  
1077 containing 25; TRIM5: tripartite motif containing 5; TRIM59: tripartite motif containing 59;  
1078 TYK2: tyrosine kinase 2; UBD: ubiquitin D; UBE2R2: ubiquitin conjugating enzyme E2 R2;  
1079 UCP1: uncoupling protein 1; VCAM1: vascular cell adhesion molecule 1; ZNHIT3: zinc finger  
1080 HIT-type containing 3.

1081

1082

### 1083 **Competing Interests**

1084 The authors have declared that no competing interests exist.

1085

1086

### 1087 **Funding**

1088 HC is supported by the China Scholarship Council (201706620069). JH, QG and DLR are  
1089 supported by the Medical Research Council (MC\_UU\_1201412). The funders had no role in  
1090 study design, data collection and analysis, decision to publish, or preparation of the manuscript.

1091

1092

### 1093 **Authors' Contributions**

1094 Conceptualization: all authors; data curation: H. C.; formal analysis: H. C.; funding acquisition:  
1095 D. L. R.; investigation: H. C.; methodology: H. C.; project administration: D. L. R., J. H.;  
1096 resources: Q. G., J. H., D. L. R.; web server: H. C.; supervision: Q. G., J. H., D. L. R.; validation:  
1097 all authors; visualization: H. C.; writing original draft: H. C.; writing review & editing: all  
1098 authors.

1099

1100

## 1101 **Acknowledgments**

1102 The authors wish to thank Drs Andrew Davison, Suzannah Rihn and Sam Wilson for helpful  
1103 discussions and recommendations, and Scott Arkison for help setting up the website.

1104

1105

## 1106 **References**

- 1107 1. Rönnblom L. The type I interferon system in the etiopathogenesis of autoimmune  
1108 diseases. *Ups J Med Sci.* 2011;116(4):227-37.
- 1109 2. Mostafavi S, Yoshida H, Moodley D, LeBoité H, Rothamel K, Raj T, et al. Parsing the  
1110 interferon transcriptional network and its disease associations. *Cell.* 2016;164(3):564-  
1111 78.
- 1112 3. Shaw AE, Hughes J, Gu Q, Behdenna A, Singer JB, Dennis T, et al. Fundamental  
1113 properties of the mammalian innate immune system revealed by multispecies  
1114 comparison of type I interferon responses. *PLoS Biol.* 2017;15(12):e2004086.
- 1115 4. Shalhoub S. Interferon beta-1b for COVID-19. *The Lancet.* 2020;395(10238):1670-1.
- 1116 5. Harris BD, Schreiter J, Chevrier M, Jordan JL and Walter MR. Human interferon- $\epsilon$  and  
1117 interferon- $\kappa$  exhibit low potency and low affinity for cell-surface IFNAR and the  
1118 poxvirus antagonist B18R. *J Biol Chem.* 2018;293(41):16057-68.
- 1119 6. Li S-f, Zhao F-r, Shao J-j, Xie Y-l, Chang H-y and Zhang Y-g. Interferon-omega:  
1120 Current status in clinical applications. *Int Immunopharmacol.* 2017;52):253-60.
- 1121 7. Kak G, Raza M and Tiwari BK. Interferon-gamma (IFN- $\gamma$ ): exploring its implications  
1122 in infectious diseases. *Biomol Concepts.* 2018;9(1):64-79.

- 1123 8. Hemann EA, Gale Jr M and Savan R. Interferon lambda genetics and biology in  
1124 regulation of viral control. *Front Immunol.* 2017;8):1707.
- 1125 9. Schneider WM, Chevillotte MD and Rice CM. Interferon-stimulated genes: a complex  
1126 web of host defenses. *Annu Rev Immunol.* 2014;32):513-45.
- 1127 10. Kotenko SV and Durbin JE. Contribution of type III interferons to antiviral immunity:  
1128 location, location, location. *J Biol Chem.* 2017;292(18):7295-303.
- 1129 11. Fensterl V and Sen GC. Interferons and viral infections. *Biofactors.* 2009;35(1):14-20.
- 1130 12. Lazear HM, Schoggins JW and Diamond MS. Shared and distinct functions of type I  
1131 and type III interferons. *Immunity.* 2019;50(4):907-23.
- 1132 13. Takaoka A and Yanai H. Interferon signalling network in innate defence. *Cell*  
1133 *Microbiol.* 2006;8(6):907-22.
- 1134 14. Stark GR and Darnell Jr JE. The JAK-STAT pathway at twenty. *Immunity.*  
1135 2012;36(4):503-14.
- 1136 15. Schoggins JW. Interferon-stimulated genes: what do they all do? *Annu Rev Virol.*  
1137 2019;6):567-84.
- 1138 16. Aso H, Ito J, Koyanagi Y and Sato K. Comparative description of the expression profile  
1139 of interferon-stimulated genes in multiple cell lineages targeted by HIV-1 infection.  
1140 *Front Microbiol.* 2019;10):429.
- 1141 17. Dang W, Xu L, Yin Y, Chen S, Wang W, Hakim MS, et al. IRF-1, RIG-I and MDA5  
1142 display potent antiviral activities against norovirus coordinately induced by different  
1143 types of interferons. *Antiviral Res.* 2018;155):48-59.
- 1144 18. Masola V, Bellin G, Gambaro G and Onisto M. Heparanase: A multitasking protein  
1145 involved in extracellular matrix (ECM) remodeling and intracellular events. *Cells.*  
1146 2018;7(12):236.

- 1147 19. Schoggins JW. Recent advances in antiviral interferon-stimulated gene biology.  
1148 F1000Research. 2018;7
- 1149 20. Spence JS, He R, Hoffmann H-H, Das T, Thinon E, Rice CM, et al. IFITM3 directly  
1150 engages and shuttles incoming virus particles to lysosomes. Nat Chem Biol.  
1151 2019;15(3):259-68.
- 1152 21. Haller O, Staeheli P, Schwemmle M and Kochs G. Mx GTPases: dynamin-like antiviral  
1153 machines of innate immunity. Trends Microbiol. 2015;23(3):154-63.
- 1154 22. García-Sastre A. Ten strategies of interferon evasion by viruses. Cell Host Microbe.  
1155 2017;22(2):176-84.
- 1156 23. Giotis ES, Robey RC, Skinner NG, Tomlinson CD, Goodbourn S and Skinner MA.  
1157 Chicken interferome: avian interferon-stimulated genes identified by microarray and  
1158 RNA-seq of primary chick embryo fibroblasts treated with a chicken type I interferon  
1159 (IFN- $\alpha$ ). Vet Res. 2016;47(1):1-12.
- 1160 24. Rusinova I, Forster S, Yu S, Kannan A, Masse M, Cumming H, et al. Interferome v2.  
1161 0: an updated database of annotated interferon-regulated genes. Nucleic Acids Res.  
1162 2012;41(D1):D1040-D6.
- 1163 25. OhAinle M, Helms L, Vermeire J, Roesch F, Humes D, Basom R, et al. A virus-  
1164 packageable CRISPR screen identifies host factors mediating interferon inhibition of  
1165 HIV. Elife. 2018;7):e39823.
- 1166 26. Zhang Y, Burke CW, Ryman KD and Klimstra WB. Identification and characterization  
1167 of interferon-induced proteins that inhibit alphavirus replication. J Virol.  
1168 2007;81(20):11246-55.
- 1169 27. Stark R, Grzelak M and Hadfield J. RNA sequencing: the teenage years. Nature  
1170 Reviews Genetics. 2019;20(11):631-56.

- 1171 28. Pamela C, Kanchwala M, Liang H, Kumar A, Wang L-F, Xing C, et al. The IFN  
1172 response in bats displays distinctive IFN-stimulated gene expression kinetics with  
1173 atypical RNASEL induction. *The Journal of Immunology*. 2018;200(1):209-17.
- 1174 29. Feld JJ, Nanda S, Huang Y, Chen W, Cam M, Pusek SN, et al. Hepatic gene expression  
1175 during treatment with peginterferon and ribavirin: Identifying molecular pathways for  
1176 treatment response. *Hepatology*. 2007;46(5):1548-63.
- 1177 30. Dalman MR, Deeter A, Nimishakavi G and Duan Z-H. Fold change and p-value cutoffs  
1178 significantly alter microarray interpretations. In: *BMC Bioinformatics* 2012, pp.1-4.  
1179 BioMed Central.
- 1180 31. Trilling M, Bellora N, Rutkowski AJ, de Graaf M, Dickinson P, Robertson K, et al.  
1181 Deciphering the modulation of gene expression by type I and II interferons combining  
1182 4sU-tagging, translational arrest and in silico promoter analysis. *Nucleic Acids Res*.  
1183 2013;41(17):8107-25.
- 1184 32. O'Leary NA, Wright MW, Brister JR, Ciufu S, Haddad D, McVeigh R, et al. Reference  
1185 sequence (RefSeq) database at NCBI: current status, taxonomic expansion, and  
1186 functional annotation. *Nucleic Acids Res*. 2016;44(D1):D733-D45.
- 1187 33. Bragg JG, Potter S, Bi K and Moritz C. Exon capture phylogenomics: efficacy across  
1188 scales of divergence. *Mol Ecol Resour*. 2016;16(5):1059-68.
- 1189 34. Kondrashov FA, Rogozin IB, Wolf YI and Koonin EV. Selection in the evolution of  
1190 gene duplications. *Genome Biol*. 2002;3(2):1-9.
- 1191 35. Esposito M and Moreno-Hagelsieb G. Non-synonymous to synonymous substitutions  
1192 suggest that orthologs tend to keep their functions, while paralogs are a source of  
1193 functional novelty. *bioRxiv*. 2018):354704.
- 1194 36. MacFarland TW and Yates JM. Mann–whitney u test. *Introduction to nonparametric*  
1195 *statistics for the biological sciences using R*. Springer; 2016. p. 103-32.

- 1196 37. Van den Eynden J and Larsson E. Mutational signatures are critical for proper  
1197 estimation of purifying selection pressures in cancer somatic mutation data when using  
1198 the dN/dS metric. *Front Genet.* 2017;8):74.
- 1199 38. Song H, Bremer BJ, Hinds EC, Raskutti G and Romero PA. Inferring protein sequence-  
1200 function relationships with large-scale positive-unlabeled learning. *Cell Syst.* 2020;
- 1201 39. Pessia E, Popa A, Mousset S, Rezvoy C, Duret L and Marais GA. Evidence for  
1202 widespread GC-biased gene conversion in eukaryotes. *Genome Biol Evol.*  
1203 2012;4(7):675-82.
- 1204 40. Zhou Z, Dang Y, Zhou M, Li L, Yu C-h, Fu J, et al. Codon usage is an important  
1205 determinant of gene expression levels largely through its effects on transcription.  
1206 *Proceedings of the National Academy of Sciences.* 2016;113(41):E6117-E25.
- 1207 41. Sievers A, Bosiek K, Bisch M, Dreessen C, Riedel J, Froß P, et al. K-mer content,  
1208 correlation, and position analysis of genome DNA sequences for the identification of  
1209 function and evolutionary features. *Genes.* 2017;8(4):122.
- 1210 42. Lee NK, Li X and Wang D. A comprehensive survey on genetic algorithms for DNA  
1211 motif prediction. *Inf Sci.* 2018;466):25-43.
- 1212 43. Noble WS. How does multiple testing correction work? *Nat Biotechnol.*  
1213 2009;27(12):1135-7.
- 1214 44. Di Rienzo L, Miotto M, Bò L, Ruocco G, Raimondo D and Milanetti E. Characterizing  
1215 hydrophobicity of amino acid side chain in a protein environment by investigating the  
1216 structural changes of water molecules network. *Front Mol Biosci.* 2021;8
- 1217 45. Bhadra P, Yan J, Li J, Fong S and Siu SW. AmPEP: Sequence-based prediction of  
1218 antimicrobial peptides using distribution patterns of amino acid properties and random  
1219 forest. *Sci Rep.* 2018;8(1):1-10.

- 1220 46. Pommié C, Levadoux S, Sabatier R, Lefranc G and Lefranc MP. IMGT standardized  
1221 criteria for statistical analysis of immunoglobulin V- REGION amino acid properties.  
1222 J Mol Recognit. 2004;17(1):17-32.
- 1223 47. Kumar M, Gouw M, Michael S, Sámano-Sánchez H, Pancsa R, Glavina J, et al. ELM—  
1224 the eukaryotic linear motif resource in 2020. Nucleic Acids Res. 2020;48(D1):D296-  
1225 D306.
- 1226 48. Pflieger CM and Kirschner MW. The KEN box: an APC recognition signal distinct from  
1227 the D box targeted by Cdh1. Genes Dev. 2000;14(6):655-65.
- 1228 49. Fehr AR and Yu D. Control the host cell cycle: viral regulation of the anaphase-  
1229 promoting complex. J Virol. 2013;87(16):8818-25.
- 1230 50. Bösl K, Ianevski A, Than TT, Andersen PI, Kuivanen S, Teppor M, et al. Common  
1231 nodes of virus–host interaction revealed through an integrated network analysis. Front  
1232 Immunol. 2019;10):2186.
- 1233 51. Wright PE and Dyson HJ. Intrinsically disordered proteins in cellular signalling and  
1234 regulation. Nat Rev Mol Cell Biol. 2015;16(1):18-29.
- 1235 52. Mészáros B, Erdős G and Dosztányi Z. IUPred2A: context-dependent prediction of  
1236 protein disorder as a function of redox state and protein binding. Nucleic Acids Res.  
1237 2018;46(W1):W329-W37.
- 1238 53. Hagai T, Azia A, Babu MM and Andino R. Use of host-like peptide motifs in viral  
1239 proteins is a prevalent strategy in host-virus interactions. Cell Rep. 2014;7(5):1729-39.
- 1240 54. Michael S, Travé G, Ramu C, Chica C and Gibson TJ. Discovery of candidate KEN-  
1241 box motifs using cell cycle keyword enrichment combined with native disorder  
1242 prediction and motif conservation. Bioinformatics. 2008;24(4):453-7.



- 1243 55. Alanis-Lobato G, Andrade-Navarro MA and Schaefer MH. HIPPIE v2.0: enhancing  
1244 meaningfulness and reliability of protein–protein interaction networks. *Nucleic Acids*  
1245 *Res.* 2016);gkw985.
- 1246 56. Abedi M and Gheisari Y. Nodes with high centrality in protein interaction networks are  
1247 responsible for driving signaling pathways in diabetic nephropathy. *PeerJ.*  
1248 2015;3):e1284.
- 1249 57. Ozato K, Shin D-M, Chang T-H and Morse HC. TRIM family proteins and their  
1250 emerging roles in innate immunity. *Nat Rev Immunol.* 2008;8(11):849-60.
- 1251 58. Yates AD, Achuthan P, Akanni W, Allen J, Allen J, Alvarez-Jarreta J, et al. *Ensembl*  
1252 2020. *Nucleic Acids Res.* 2020;48(D1):D682-D8.
- 1253 59. Shaw AE, Rihn SJ, Mollentze N, Wickenhagen A, Stewart DG, Orton RJ, et al. The  
1254 antiviral state has shaped the CpG composition of the vertebrate interferome to avoid  
1255 self-targeting. *PLoS Biol.* 2021;19(9):e3001352.
- 1256 60. Chang C-C and Lin C-J. LIBSVM: A library for support vector machines. *ACM Trans*  
1257 *Intell Syst Technol.* 2011;2(3):1-27.
- 1258 61. Chicco D and Jurman G. The advantages of the Matthews correlation coefficient (MCC)  
1259 over F1 score and accuracy in binary classification evaluation. *BMC Genomics.*  
1260 2020;21(1):1-13.
- 1261 62. Yeom S, Giacomelli I, Fredrikson M and Jha S. Privacy risk in machine learning:  
1262 Analyzing the connection to overfitting. In: *2018 IEEE 31st Computer Security*  
1263 *Foundations Symposium (CSF) 2018*, pp.268-82. IEEE.
- 1264 63. Ali J, Khan R, Ahmad N and Maqsood I. Random forests and decision trees.  
1265 *International Journal of Computer Science Issues (IJCSI).* 2012;9(5):272.
- 1266 64. Zhang M-L and Zhou Z-H. ML-KNN: A lazy learning approach to multi-label learning.  
1267 *Pattern recognition.* 2007;40(7):2038-48.

- 1268 65. Cheng D, Zhang S, Deng Z, Zhu Y and Zong M. kNN algorithm with data-driven k  
1269 value. In: *International Conference on Advanced Data Mining and Applications 2014*,  
1270 pp.499-512. Springer.
- 1271 66. Zhang J, Chai H, Gao B, Yang G and Ma Z. HEMEsPred: Structure-based ligand-  
1272 specific heme binding residues prediction by using fast-adaptive ensemble learning  
1273 scheme. *IEEE/ACM Trans Comput Biol Bioinform.* 2016;15(1):147-56.
- 1274 67. Liu X-Y, Wu J and Zhou Z-H. Exploratory undersampling for class-imbalance learning.  
1275 *IEEE Trans Syst Man Cybern.* 2008;39(2):539-50.
- 1276 68. Lonsdale J, Thomas J, Salvatore M, Phillips R, Lo E, Shad S, et al. The genotype-tissue  
1277 expression (GTEx) project. *Nat Genet.* 2013;45(6):580-5.
- 1278 69. Papatheodorou I, Moreno P, Manning J, Fuentes AM-P, George N, Fexova S, et al.  
1279 Expression Atlas update: from tissues to single cells. *Nucleic Acids Res.*  
1280 2020;48(D1):D77-D83.
- 1281 70. Jeong H, Mason SP, Barabási A-L and Oltvai ZN. Lethality and centrality in protein  
1282 networks. *Nature.* 2001;411(6833):41-2.
- 1283 71. Hahn MW and Kern AD. Comparative genomics of centrality and essentiality in three  
1284 eukaryotic protein-interaction networks. *Mol Biol Evol.* 2005;22(4):803-6.
- 1285 72. Batada NN, Hurst LD and Tyers M. Evolutionary and physiological importance of hub  
1286 proteins. *PLoS Comput Biol.* 2006;2(7):e88.
- 1287 73. Pérez-Martínez D. Innate immunity in vertebrates: an overview. *Immunology.*  
1288 2016;148(2):125-39.
- 1289 74. Jopling CL. Mutations: Stop that nonsense! *Elife.* 2014;3):e04300.
- 1290 75. Zhu X, Pribis JP, Rodriguez PC, Morris Jr SM, Vodovotz Y, Billiar TR, et al. The  
1291 central role of arginine catabolism in T-cell dysfunction and increased susceptibility to  
1292 infection after physical injury. *Ann Surg.* 2014;259(1):171-8.

- 1293 76. Morris CR, Hamilton- Reeves J, Martindale RG, Sarav M and Ochoa Gautier JB.  
1294 Acquired amino acid deficiencies: a focus on arginine and glutamine. *Nutr Clin Pract.*  
1295 2017;32):30S-47S.
- 1296 77. Levring TB, Hansen AK, Nielsen BL, Kongsbak M, Von Essen MR, Woetmann A, et  
1297 al. Activated human CD4+ T cells express transporters for both cysteine and cystine.  
1298 *Sci Rep.* 2012;2(1):1-6.
- 1299 78. Sikalidis AK. Amino acids and immune response: a role for cysteine, glutamine,  
1300 phenylalanine, tryptophan and arginine in T-cell function and cancer? *Pathol Oncol Res.*  
1301 2015;21(1):9-17.
- 1302 79. Yin C, Zheng T and Chang X. Biosynthesis of S-Adenosylmethionine by magnetically  
1303 immobilized *Escherichia coli* cells highly expressing a methionine adenosyltransferase  
1304 variant. *Molecules.* 2017;22(8):1365.
- 1305 80. Feld JJ, Modi AA, El-Diwany R, Rotman Y, Thomas E, Ahlenstiel G, et al. S-adenosyl  
1306 methionine improves early viral responses and interferon-stimulated gene induction in  
1307 hepatitis C nonresponders. *Gastroenterology.* 2011;140(3):830-9.
- 1308 81. Li S-W, Lai C-C, Ping J-F, Tsai F-J, Wan L, Lin Y-J, et al. Severe acute respiratory  
1309 syndrome coronavirus papain-like protease suppressed alpha interferon-induced  
1310 responses through downregulation of extracellular signal-regulated kinase 1-mediated  
1311 signalling pathways. *J Gen Virol.* 2011;92(5):1127-40.
- 1312 82. Flo TH, Smith KD, Sato S, Rodriguez DJ, Holmes MA, Strong RK, et al. Lipocalin 2  
1313 mediates an innate immune response to bacterial infection by sequestering iron. *Nature.*  
1314 2004;432(7019):917-21.
- 1315 83. Tissot C, Rebouissou C, Klein B and Mechti N. Both human  $\alpha/\beta$  and  $\gamma$  interferons  
1316 upregulate the expression of CD48 cell surface molecules. *J Interferon Cytokine Res.*  
1317 1997;17(1):17-26.

- 1318 84. Noçon AL, Ip JP, Terry R, Lim SL, Getts DR, Müller M, et al. The bacteriostatic protein  
1319 lipocalin 2 is induced in the central nervous system of mice with West Nile virus  
1320 encephalitis. *J Virol.* 2014;88(1):679-89.
- 1321 85. Zarama A, Perez-Carmona N, Farre D, Tomic A, Borst EM, Messerle M, et al.  
1322 Cytomegalovirus m154 hinders CD48 cell-surface expression and promotes viral  
1323 escape from host natural killer cell control. *PLoS Pathog.* 2014;10(3):e1004000.
- 1324 86. Martínez-Vicente P, Farré D, Engel P and Angulo A. Divergent Traits and Ligand-  
1325 Binding Properties of the Cytomegalovirus CD48 Gene Family. *Viruses.*  
1326 2020;12(8):813.
- 1327 87. Ricquier D. UCP1, the mitochondrial uncoupling protein of brown adipocyte: a  
1328 personal contribution and a historical perspective. *Biochimie.* 2017;134):3-8.
- 1329 88. Yu X, Liu H, Hamel KA, Morvan MG, Yu S, Leff J, et al. Dorsal root ganglion  
1330 macrophages contribute to both the initiation and persistence of neuropathic pain. *Nat*  
1331 *Commun.* 2020;11(1):1-12.
- 1332 89. Chen Y, Lun AT and Smyth GK. From reads to genes to pathways: differential  
1333 expression analysis of RNA-Seq experiments using Rsubread and the edgeR quasi-  
1334 likelihood pipeline. *F1000Research.* 2016;5
- 1335 90. Herrero J, Muffato M, Beal K, Fitzgerald S, Gordon L, Pignatelli M, et al. Ensembl  
1336 comparative genomics resources. *Database.* 2016;2016):bav096.
- 1337 91. Li HD, Menon R, Omenn GS and Guan Y. Revisiting the identification of canonical  
1338 splice isoforms through integration of functional genomics and proteomics evidence.  
1339 *Proteomics.* 2014;14(23-24):2709-18.
- 1340 92. Wang ET, Sandberg R, Luo S, Khrebtkova I, Zhang L, Mayr C, et al. Alternative  
1341 isoform regulation in human tissue transcriptomes. *Nature.* 2008;456(7221):470-6.

- 1342 93. Sieber P, Platzer M and Schuster S. The definition of open reading frame revisited.  
1343 Trends Genet. 2018;34(3):167-70.
- 1344 94. Pan Q, Shai O, Lee LJ, Frey BJ and Blencowe BJ. Deep surveying of alternative  
1345 splicing complexity in the human transcriptome by high-throughput sequencing. Nat  
1346 Genet. 2008;40(12):1413-5.
- 1347 95. Guéguen L and Duret L. Unbiased estimate of synonymous and nonsynonymous  
1348 substitution rates with nonstationary base composition. Mol Biol Evol. 2018;35(3):734-  
1349 42.
- 1350 96. Takata MA, Gonçalves-Carneiro D, Zang TM, Soll SJ, York A, Blanco-Melo D, et al.  
1351 CG dinucleotide suppression enables antiviral defence targeting non-self RNA. Nature.  
1352 2017;550(7674):124-7.
- 1353 97. Yu C-H, Dang Y, Zhou Z, Wu C, Zhao F, Sachs MS, et al. Codon usage influences the  
1354 local rate of translation elongation to regulate co-translational protein folding. Mol Cell.  
1355 2015;59(5):744-54.
- 1356 98. Tufarelli C, Ahmad A, Strohbuecker S, Scotti C and Sottile V. In Silico Identification  
1357 of SOX1 Post-Translational Modifications Highlights a Shared Protein Motif. 2020;
- 1358 99. Yoon J, Blumer A and Lee K. An algorithm for modularity analysis of directed and  
1359 weighted biological networks based on edge-betweenness centrality. Bioinformatics.  
1360 2006;22(24):3106-8.
- 1361 100. Friedel CC and Zimmer R. Influence of degree correlations on network structure and  
1362 stability in protein-protein interaction networks. BMC Bioinformatics. 2007;8(1):1-10.
- 1363 101. Ravasz E, Somera AL, Mongru DA, Oltvai ZN and Barabási A-L. Hierarchical  
1364 organization of modularity in metabolic networks. Science. 2002;297(5586):1551-5.  
1365

Figure 1

[Click here to access/download;Figure;Figure\\_1.eps](#)

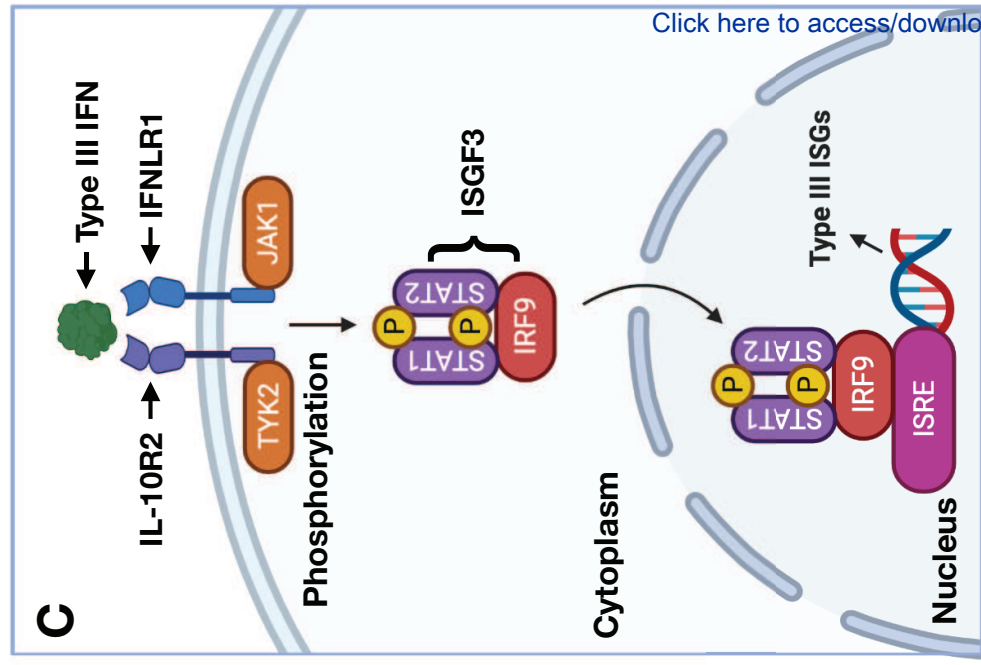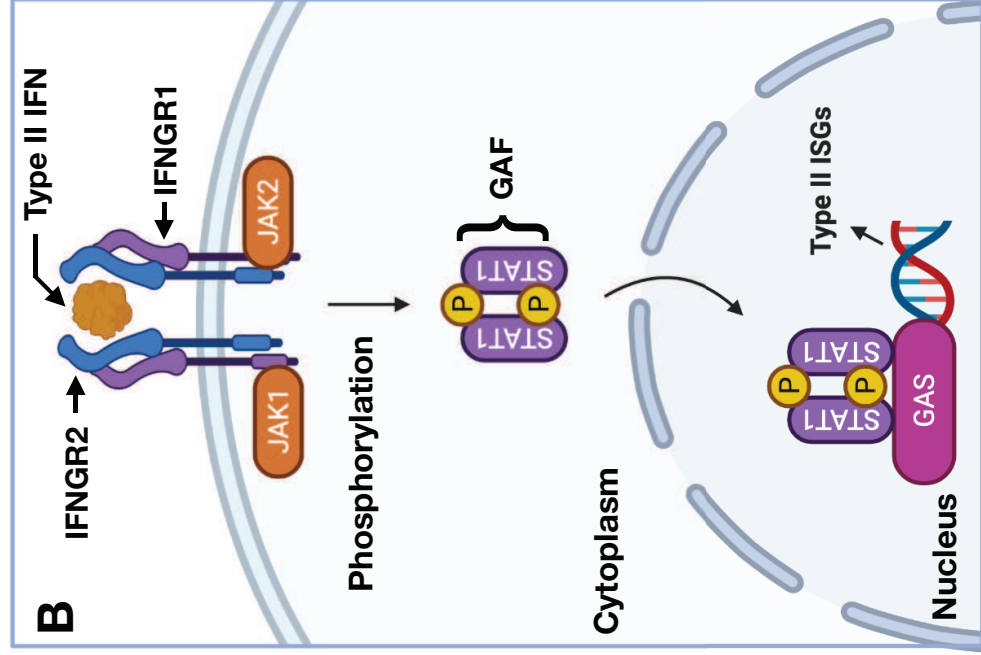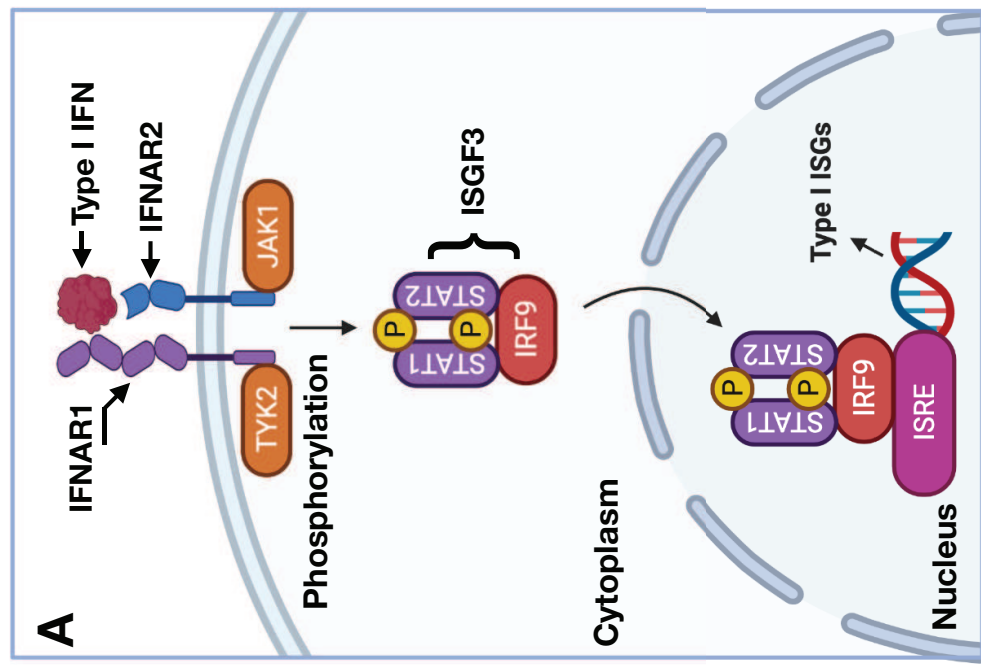

Figure 2

[Click here to access/download;Figure;Figure\\_2.eps](#)

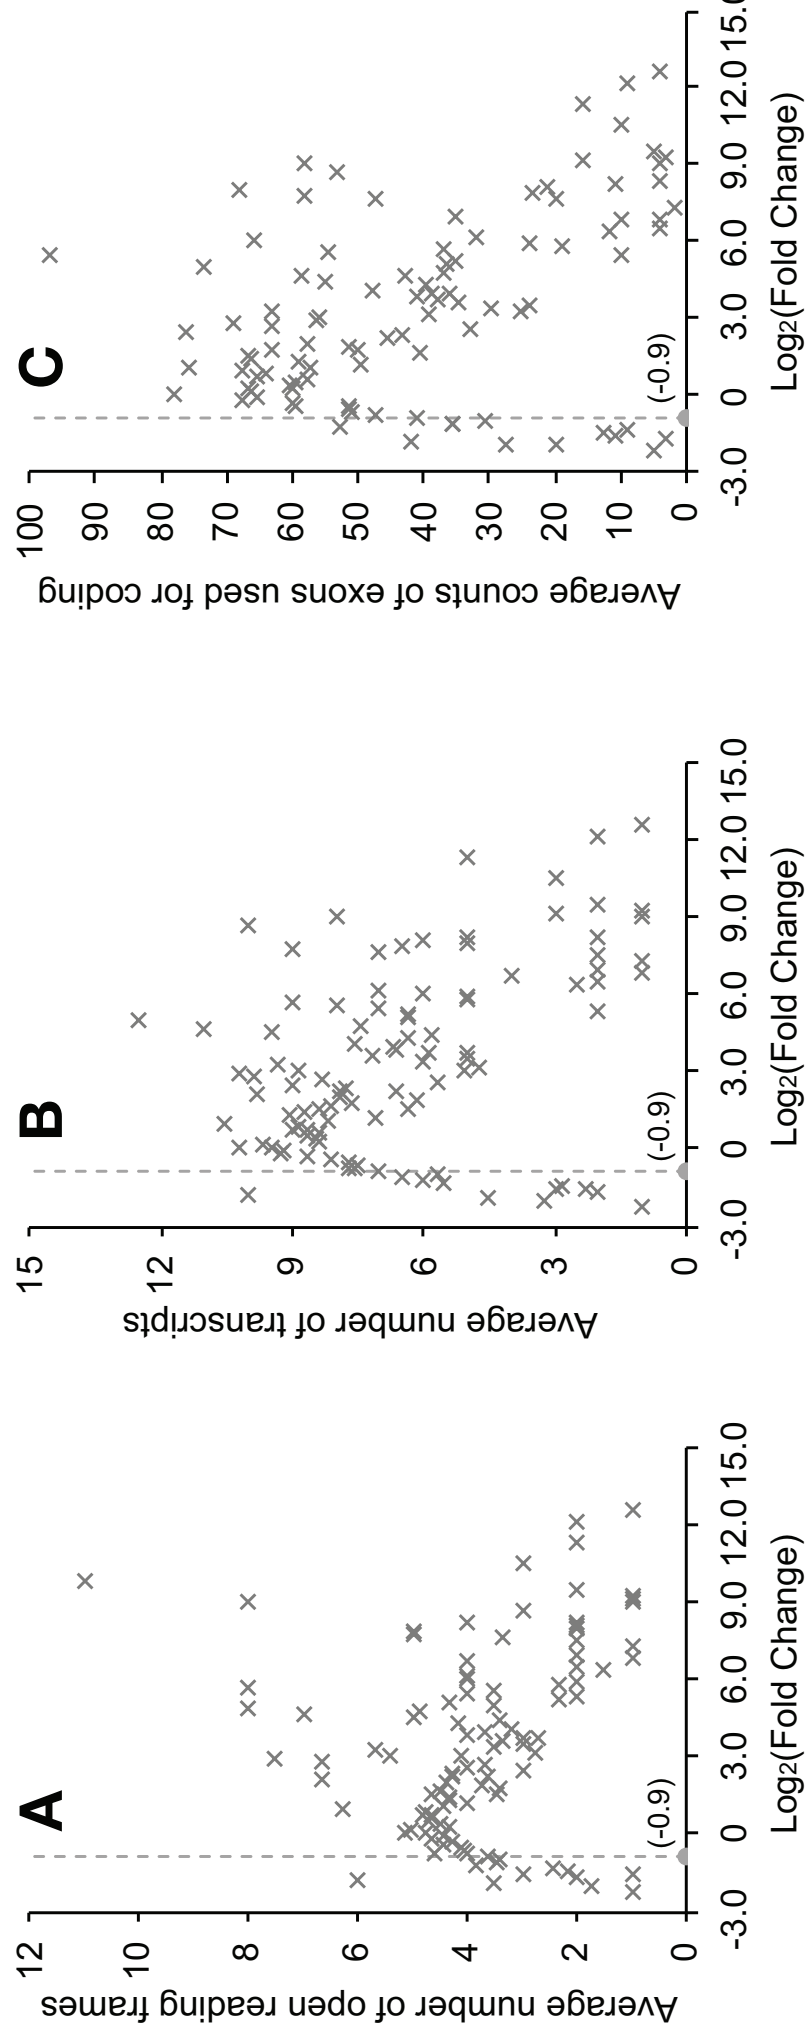

Figure 3

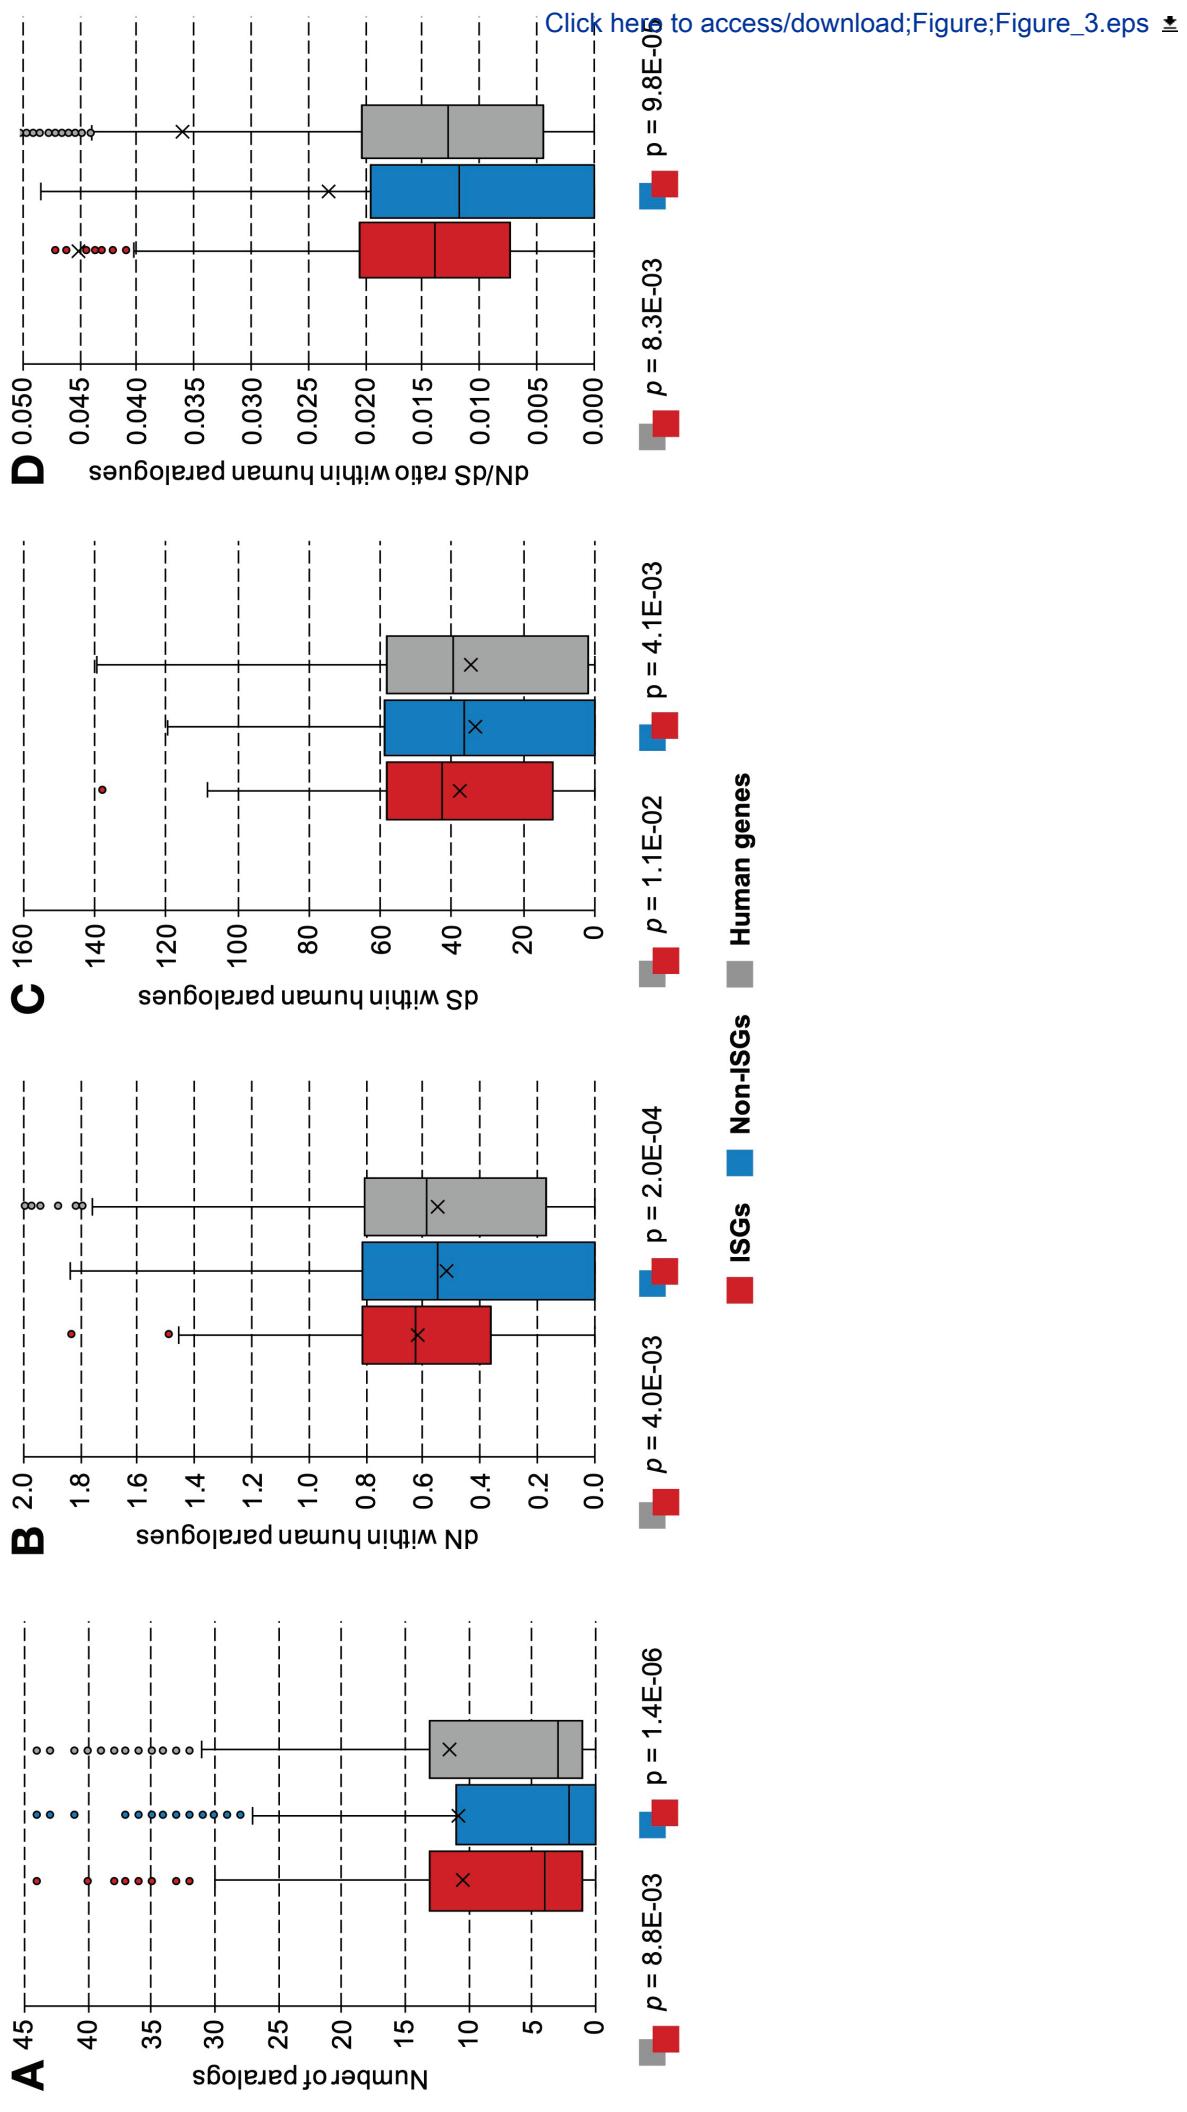



Figure 4

[Click here to access/download;Figure;Figure\\_4.eps](#)

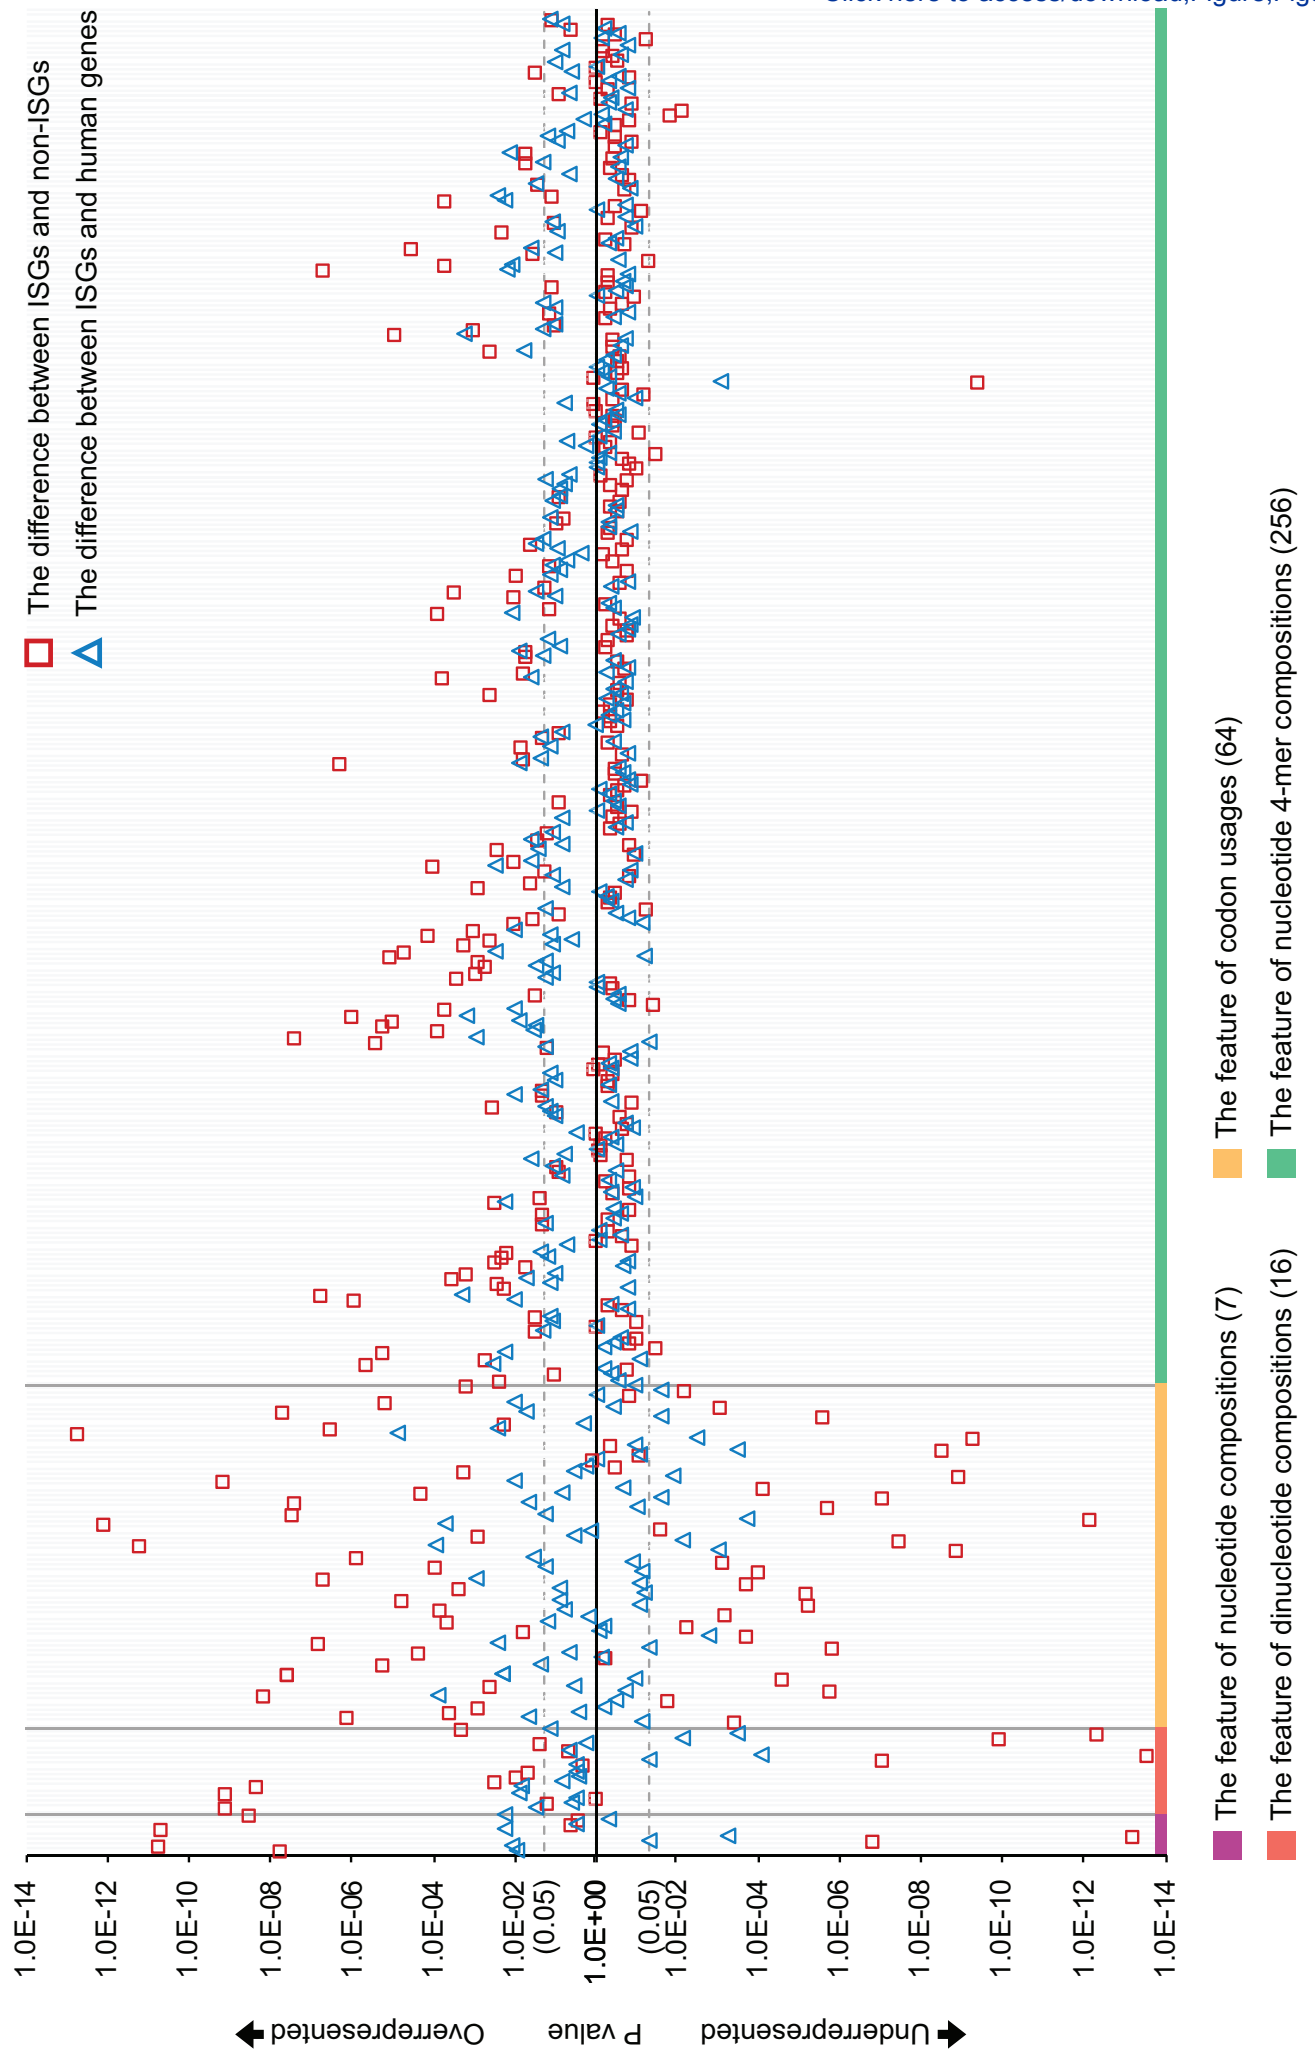

Figure 5

[Click here to access/download;Figure;Figure\\_5.eps](#)

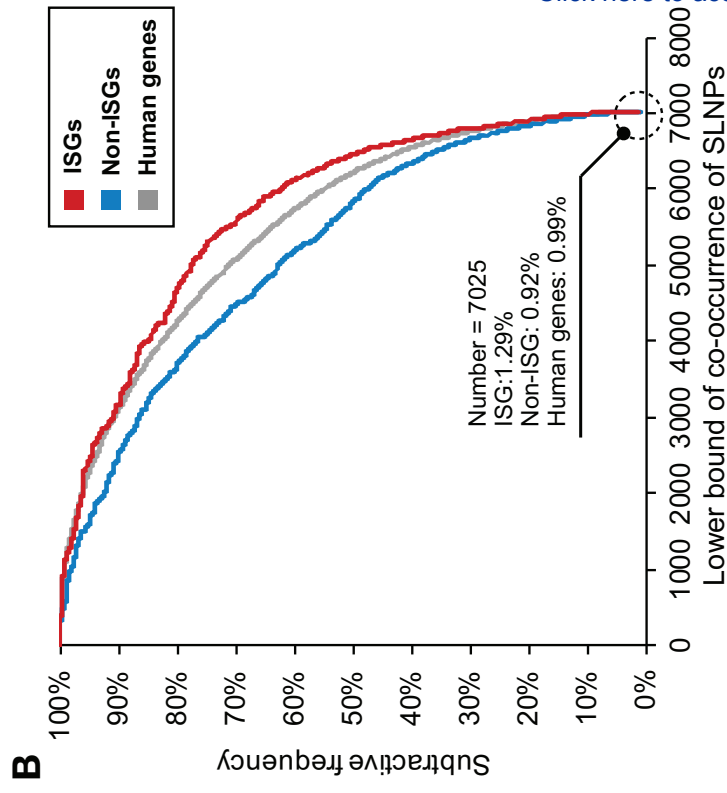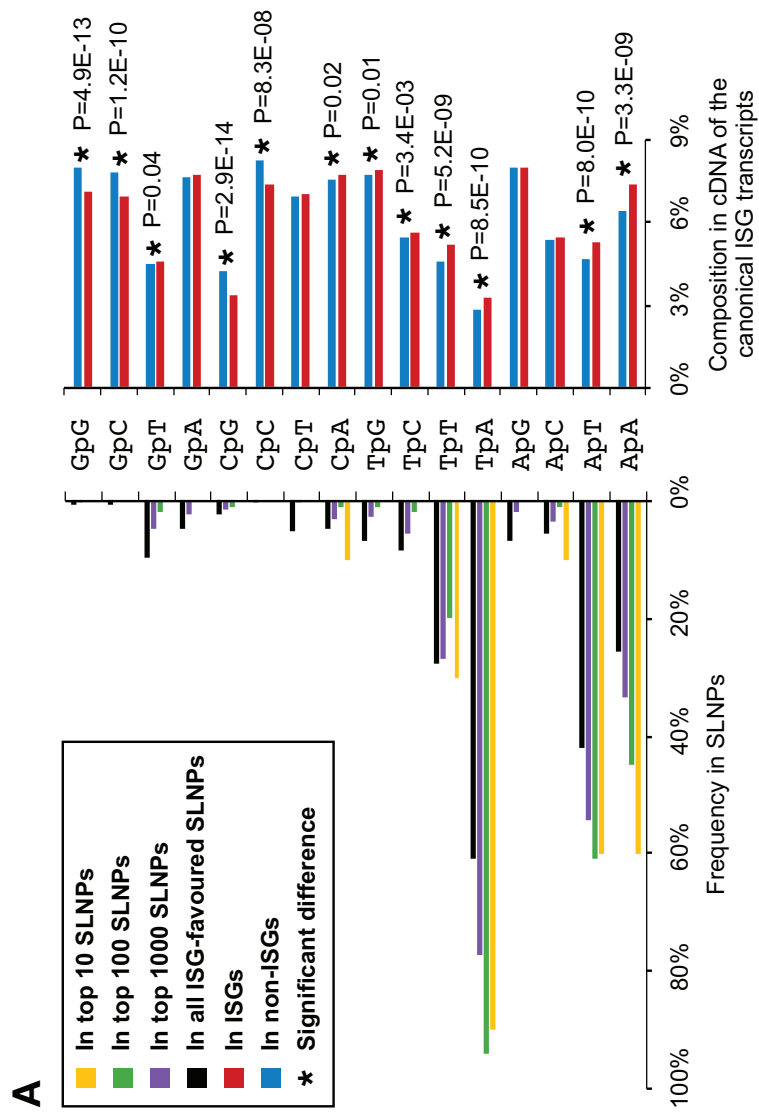

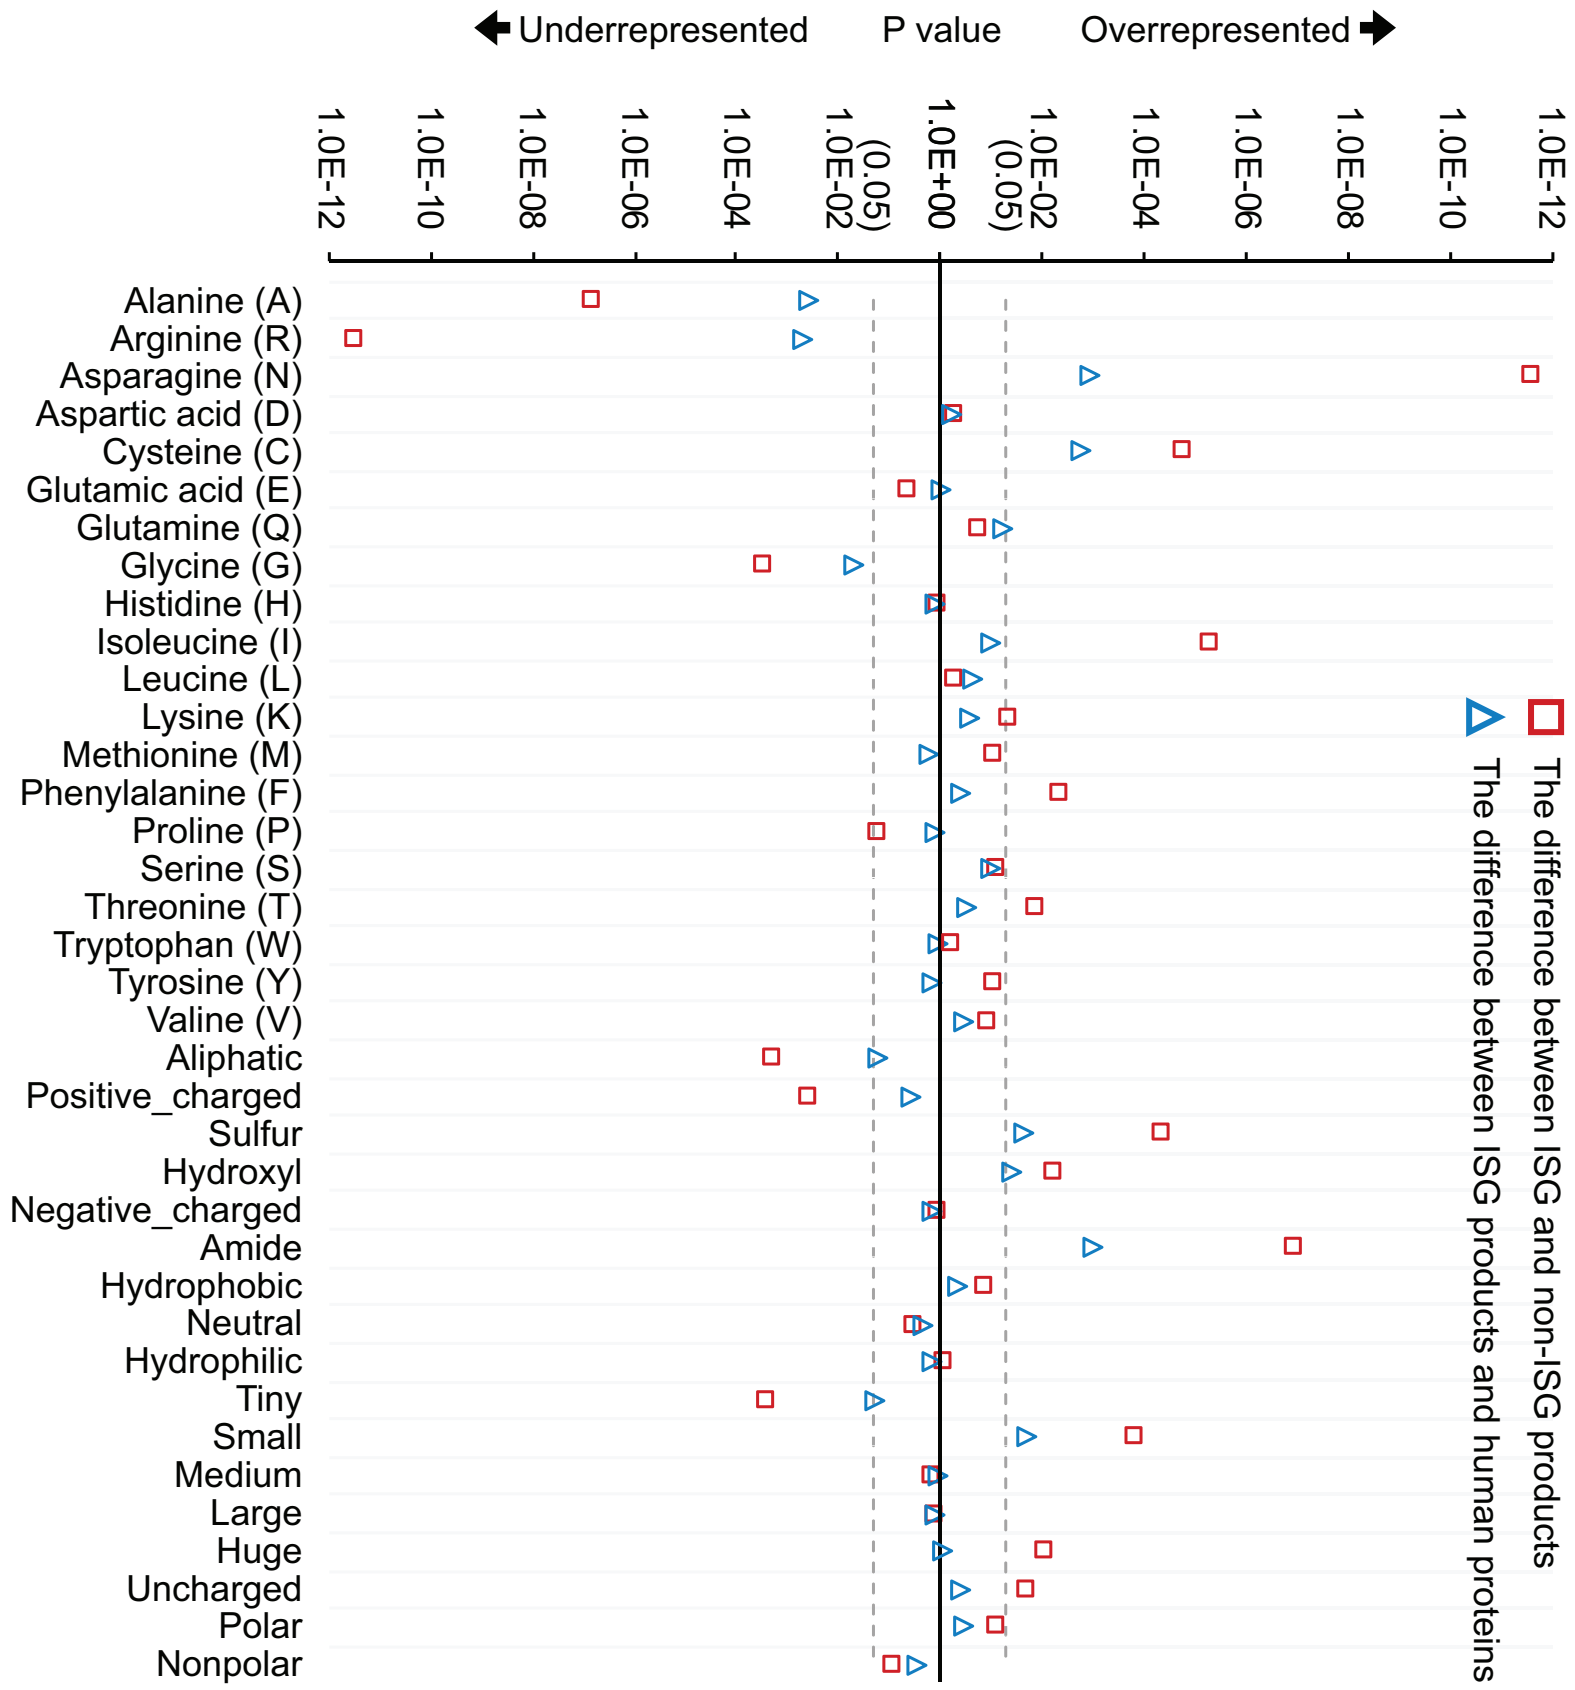

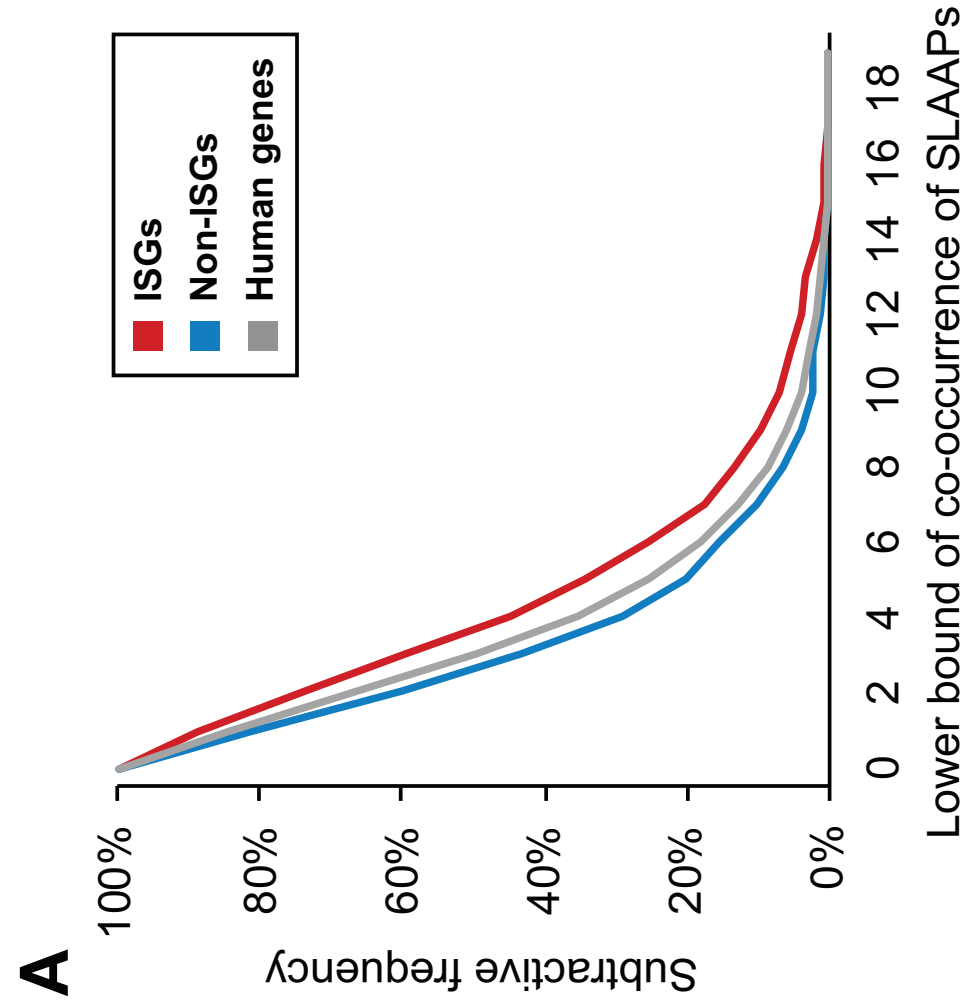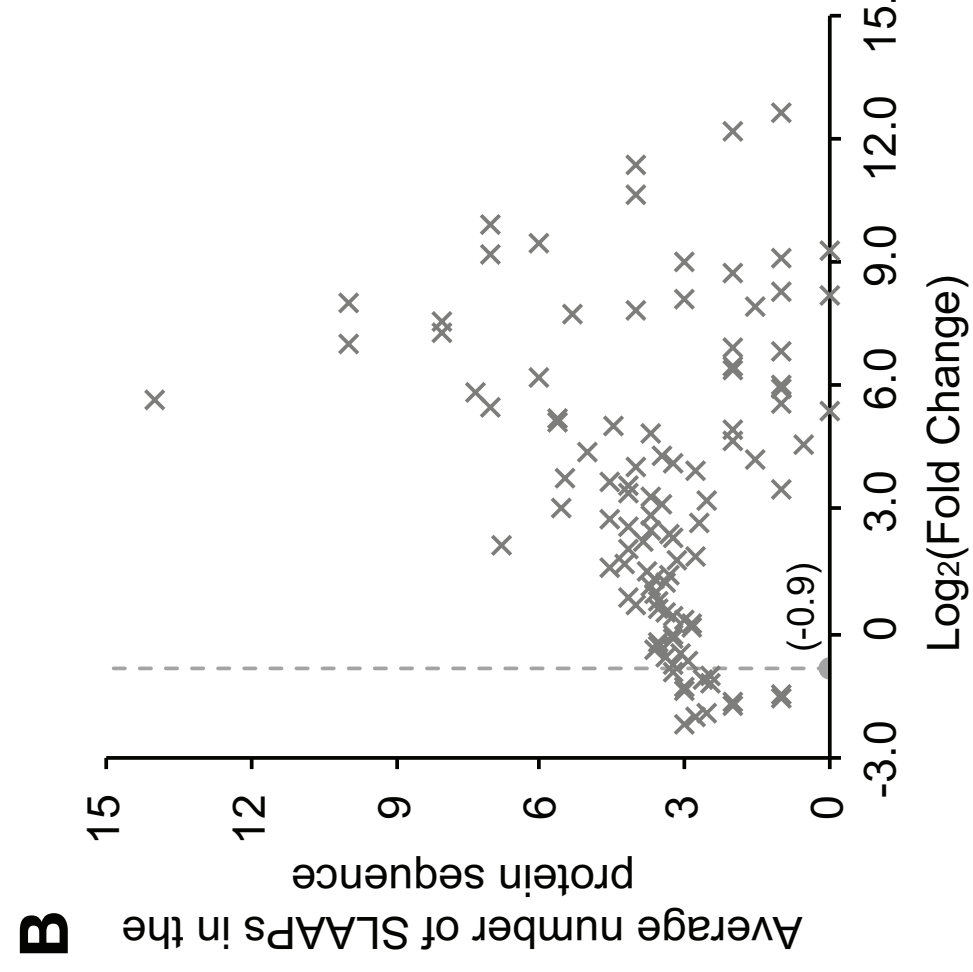

Figure 8

[Click here to access/download;Figure;Figure\\_8.eps](#)

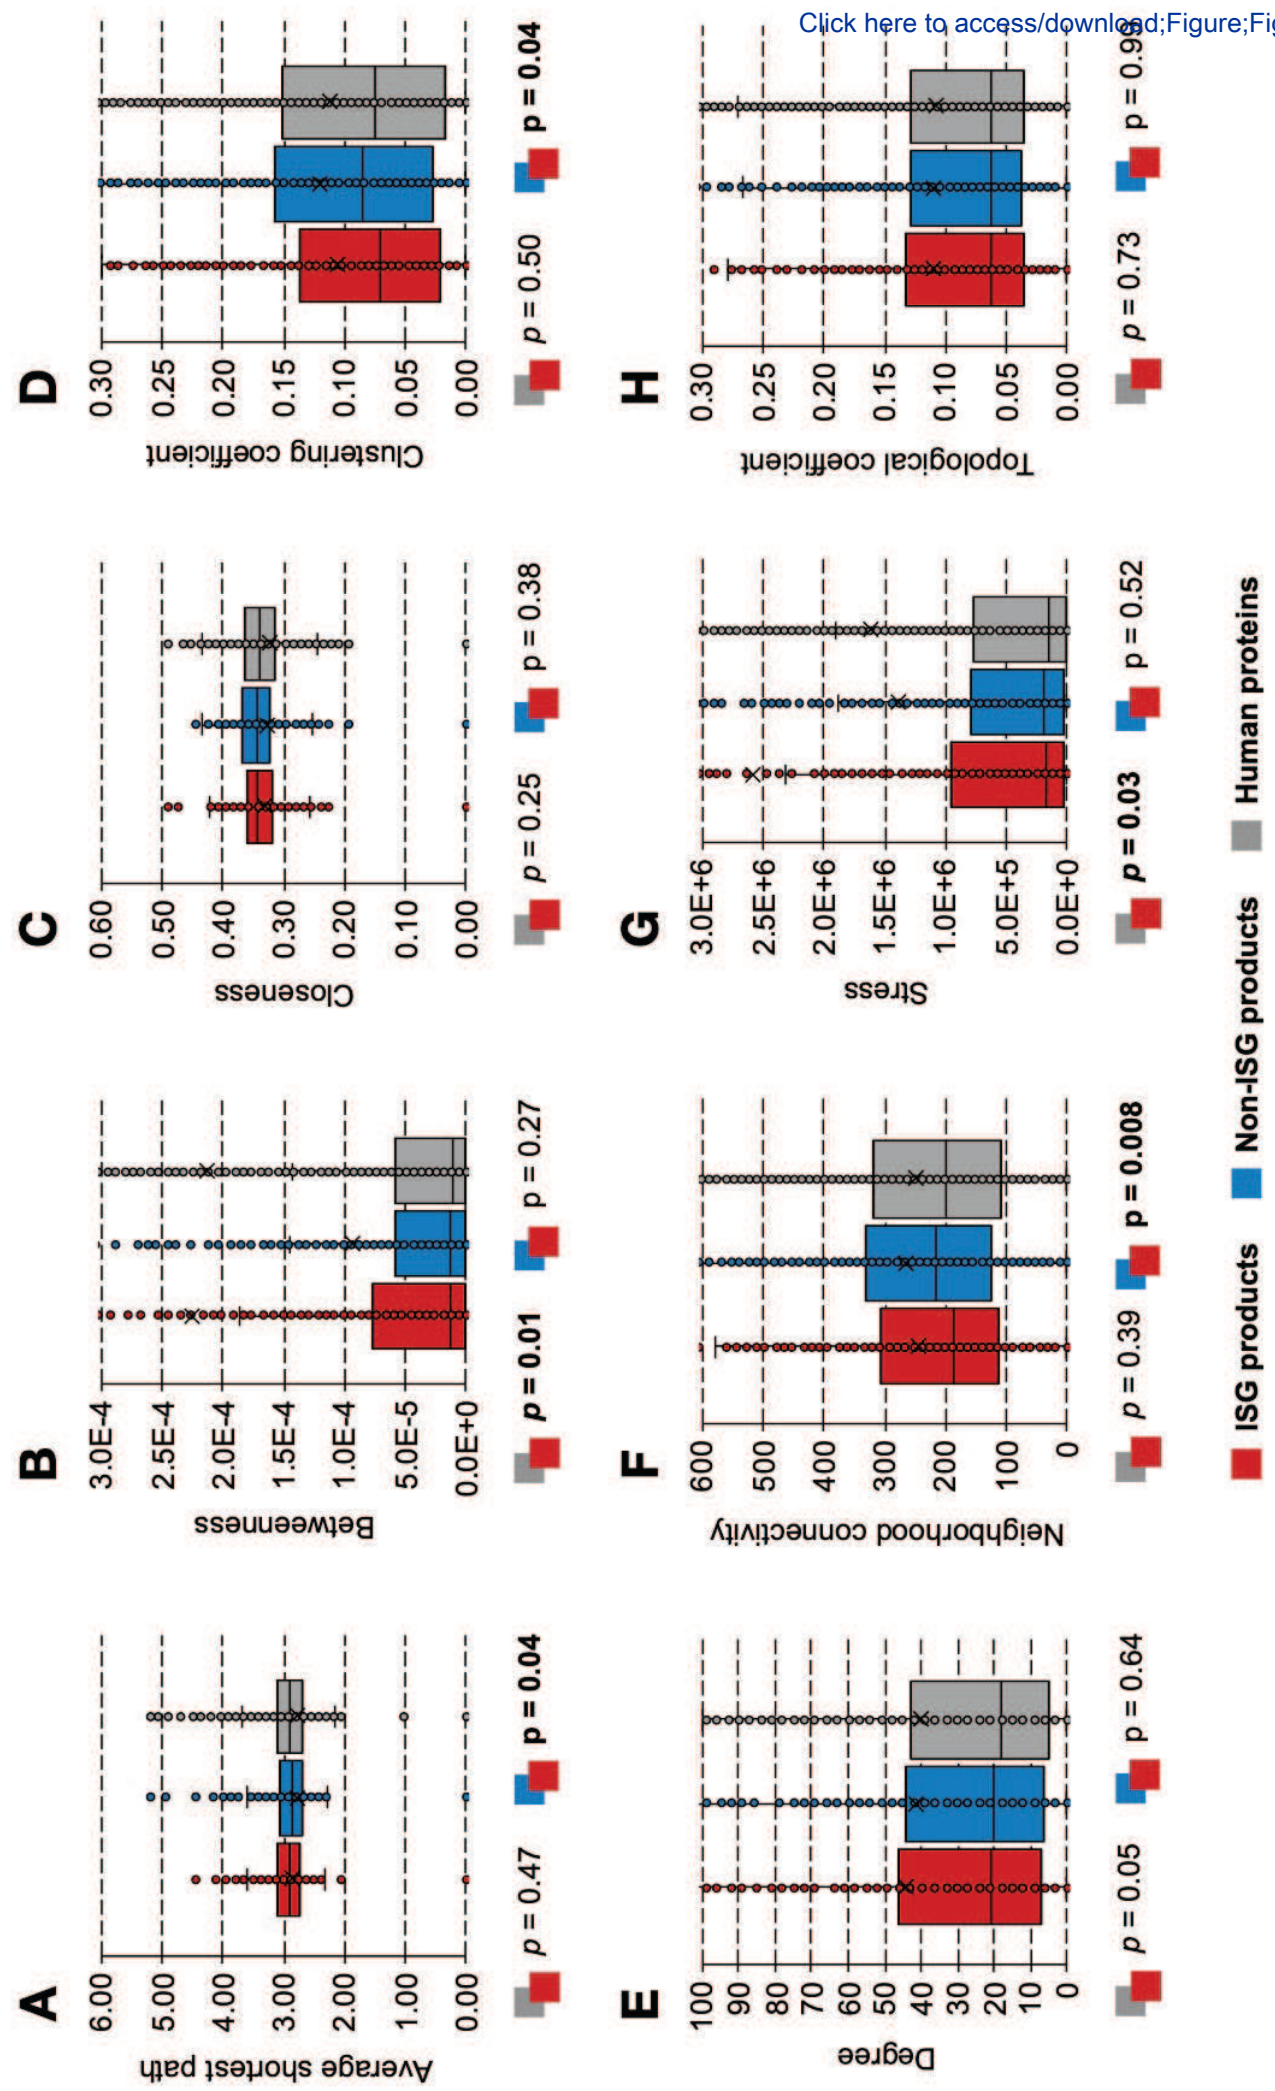

Figure 9

[Click here to access/download;Figure;Figure\\_9.eps](#)

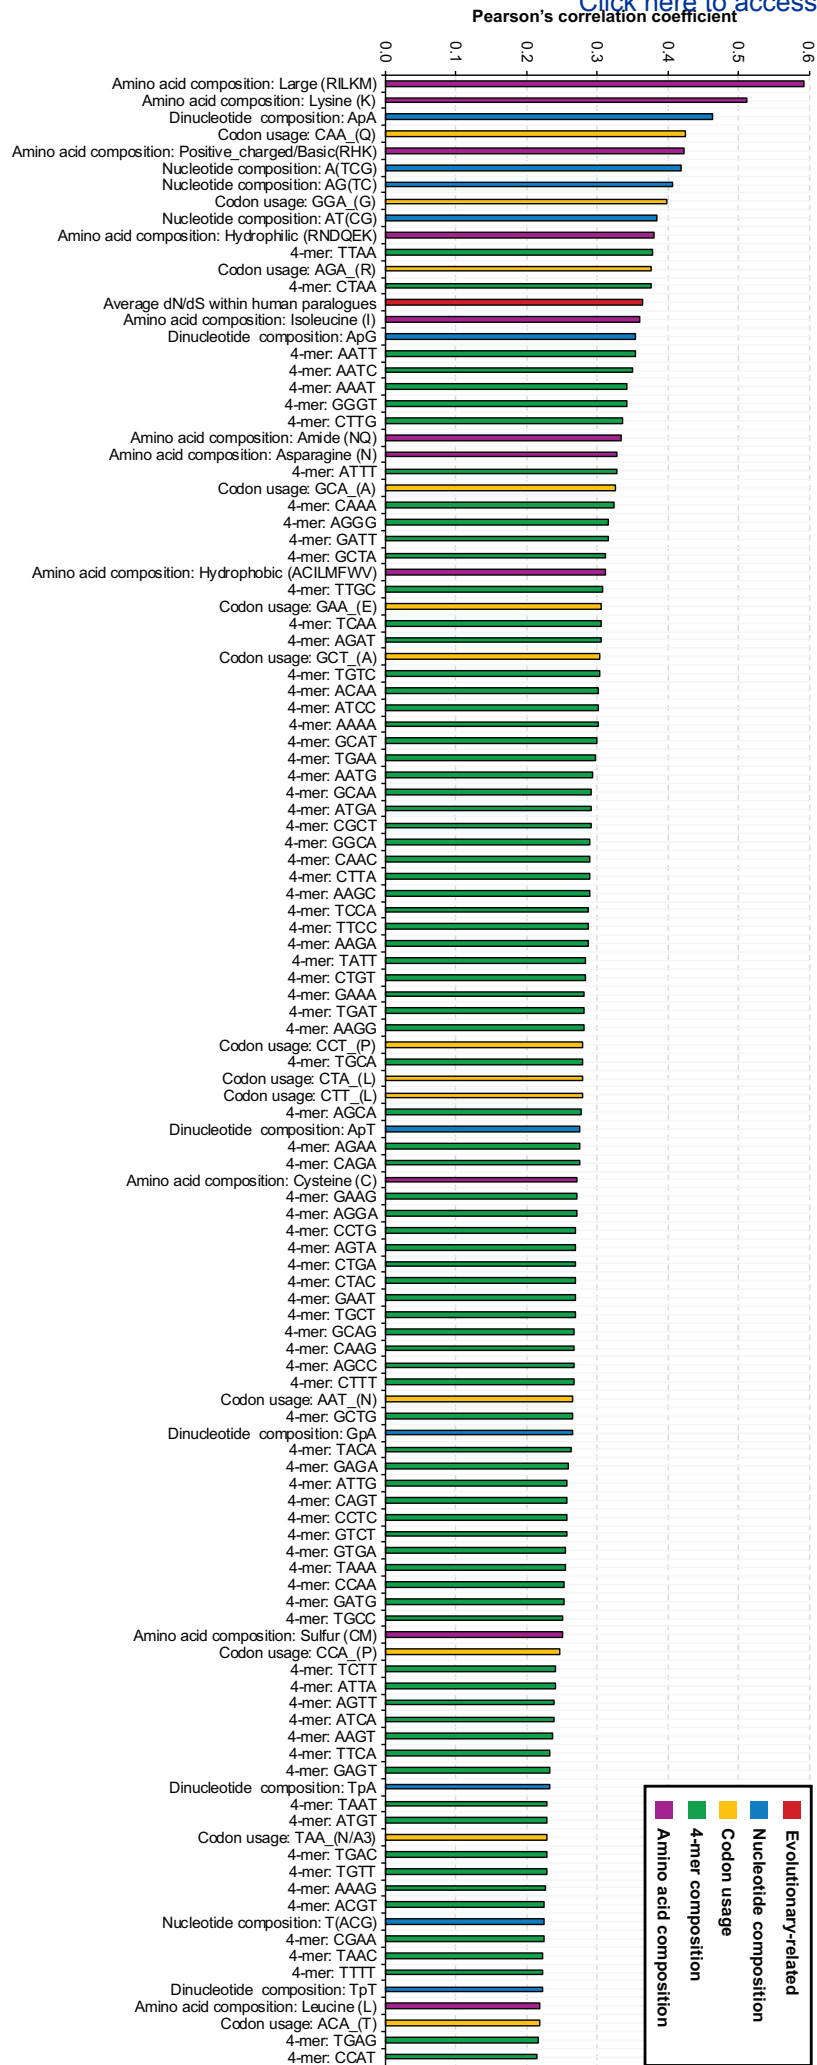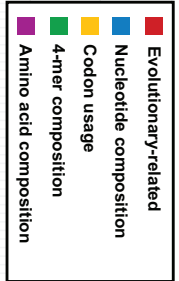

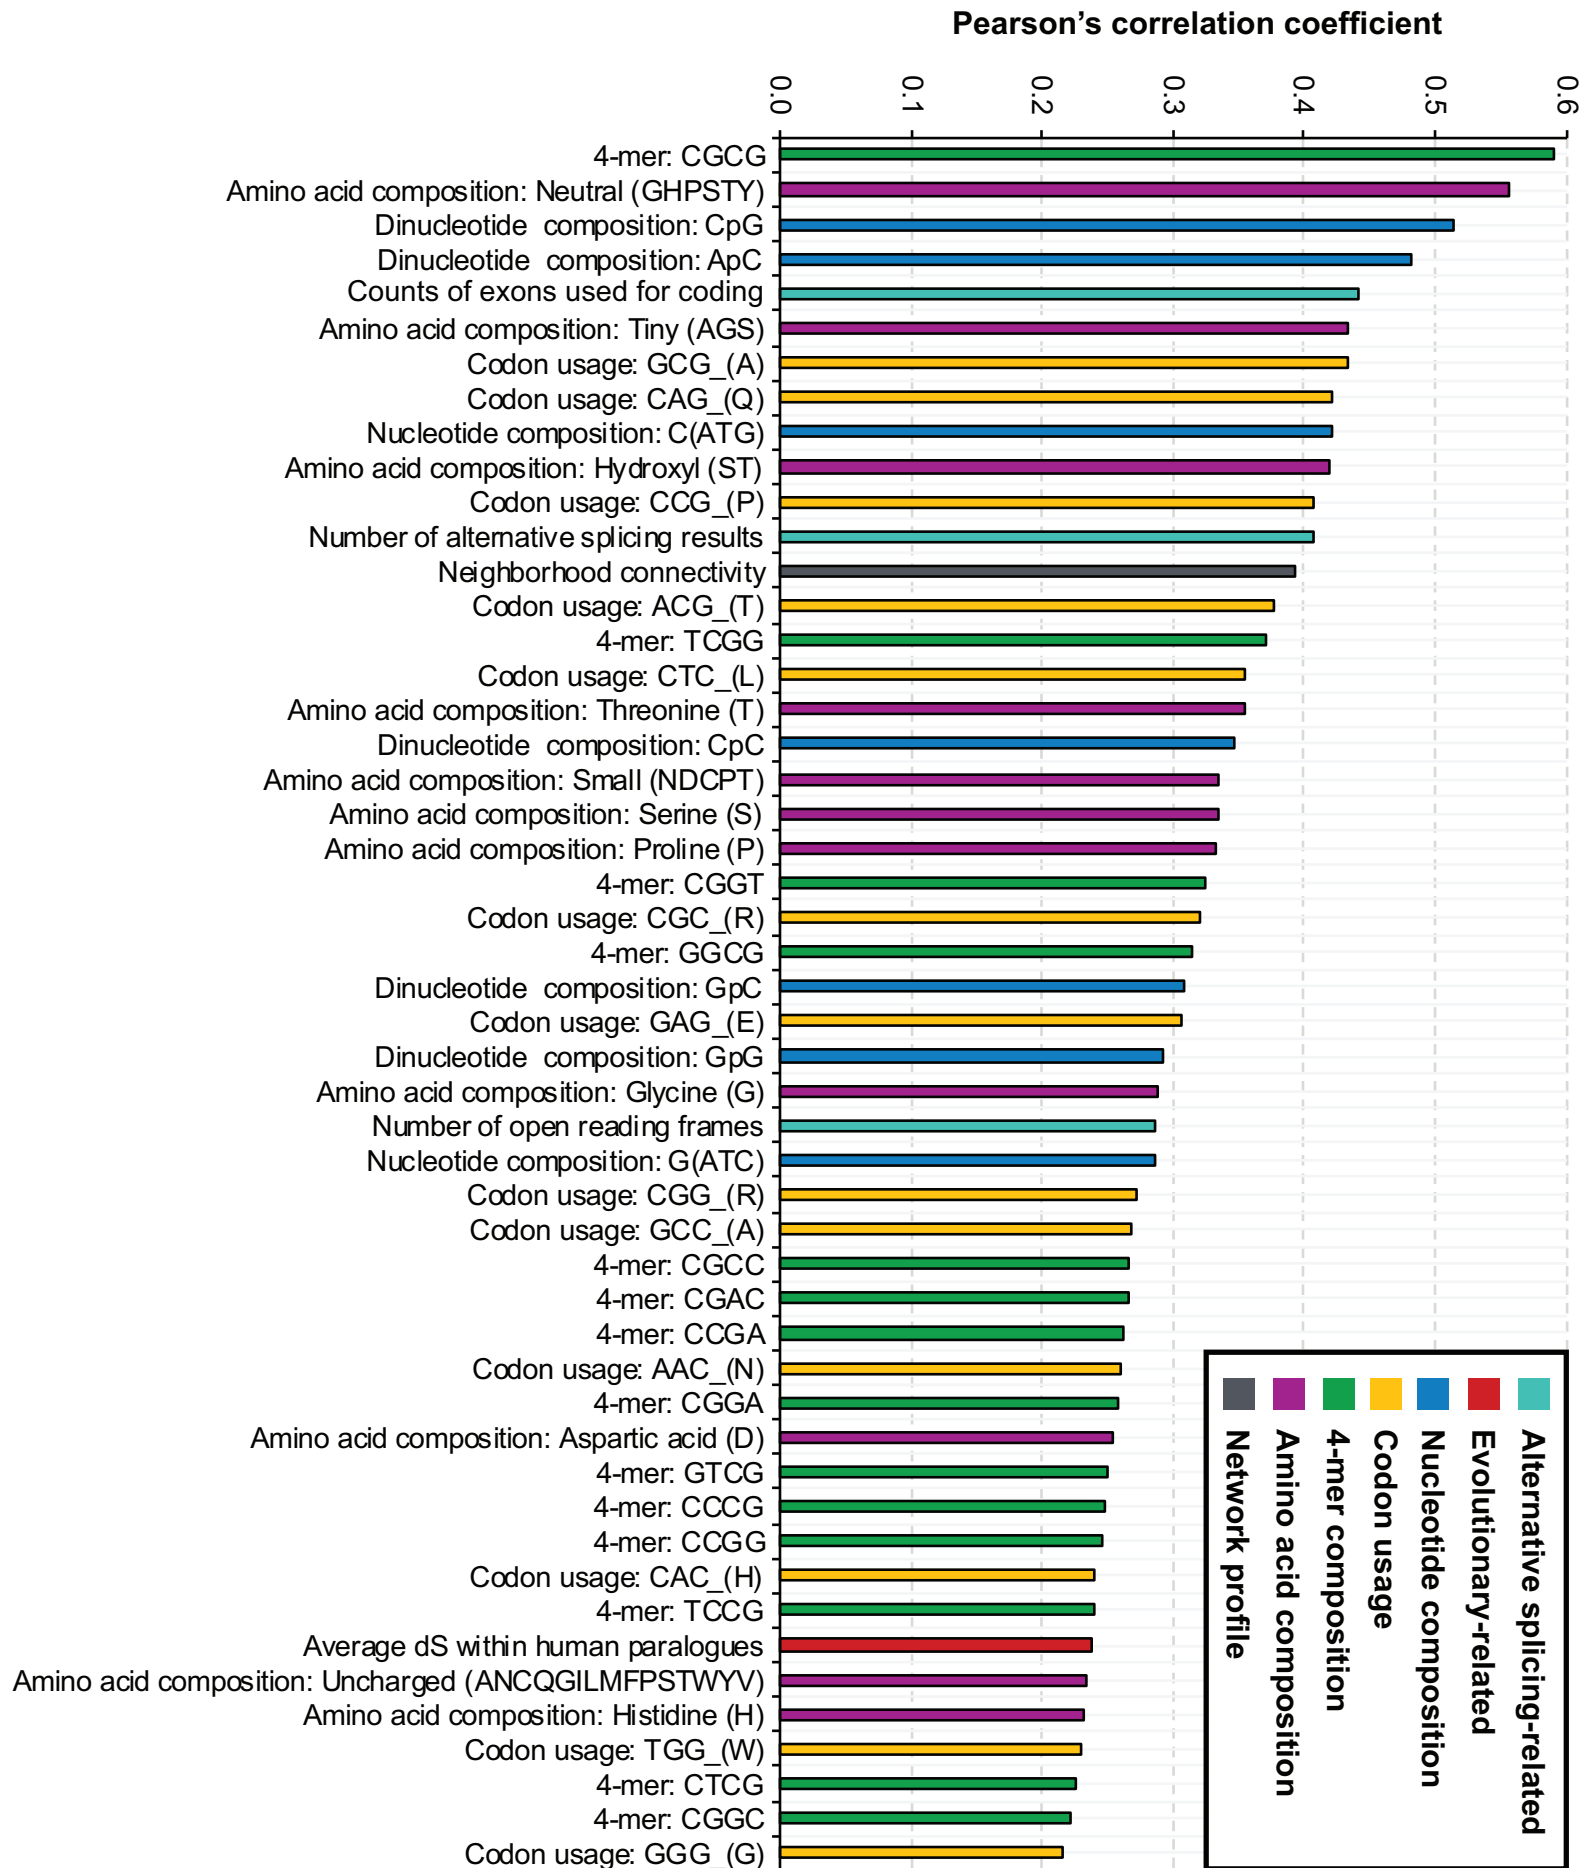

Figure 11

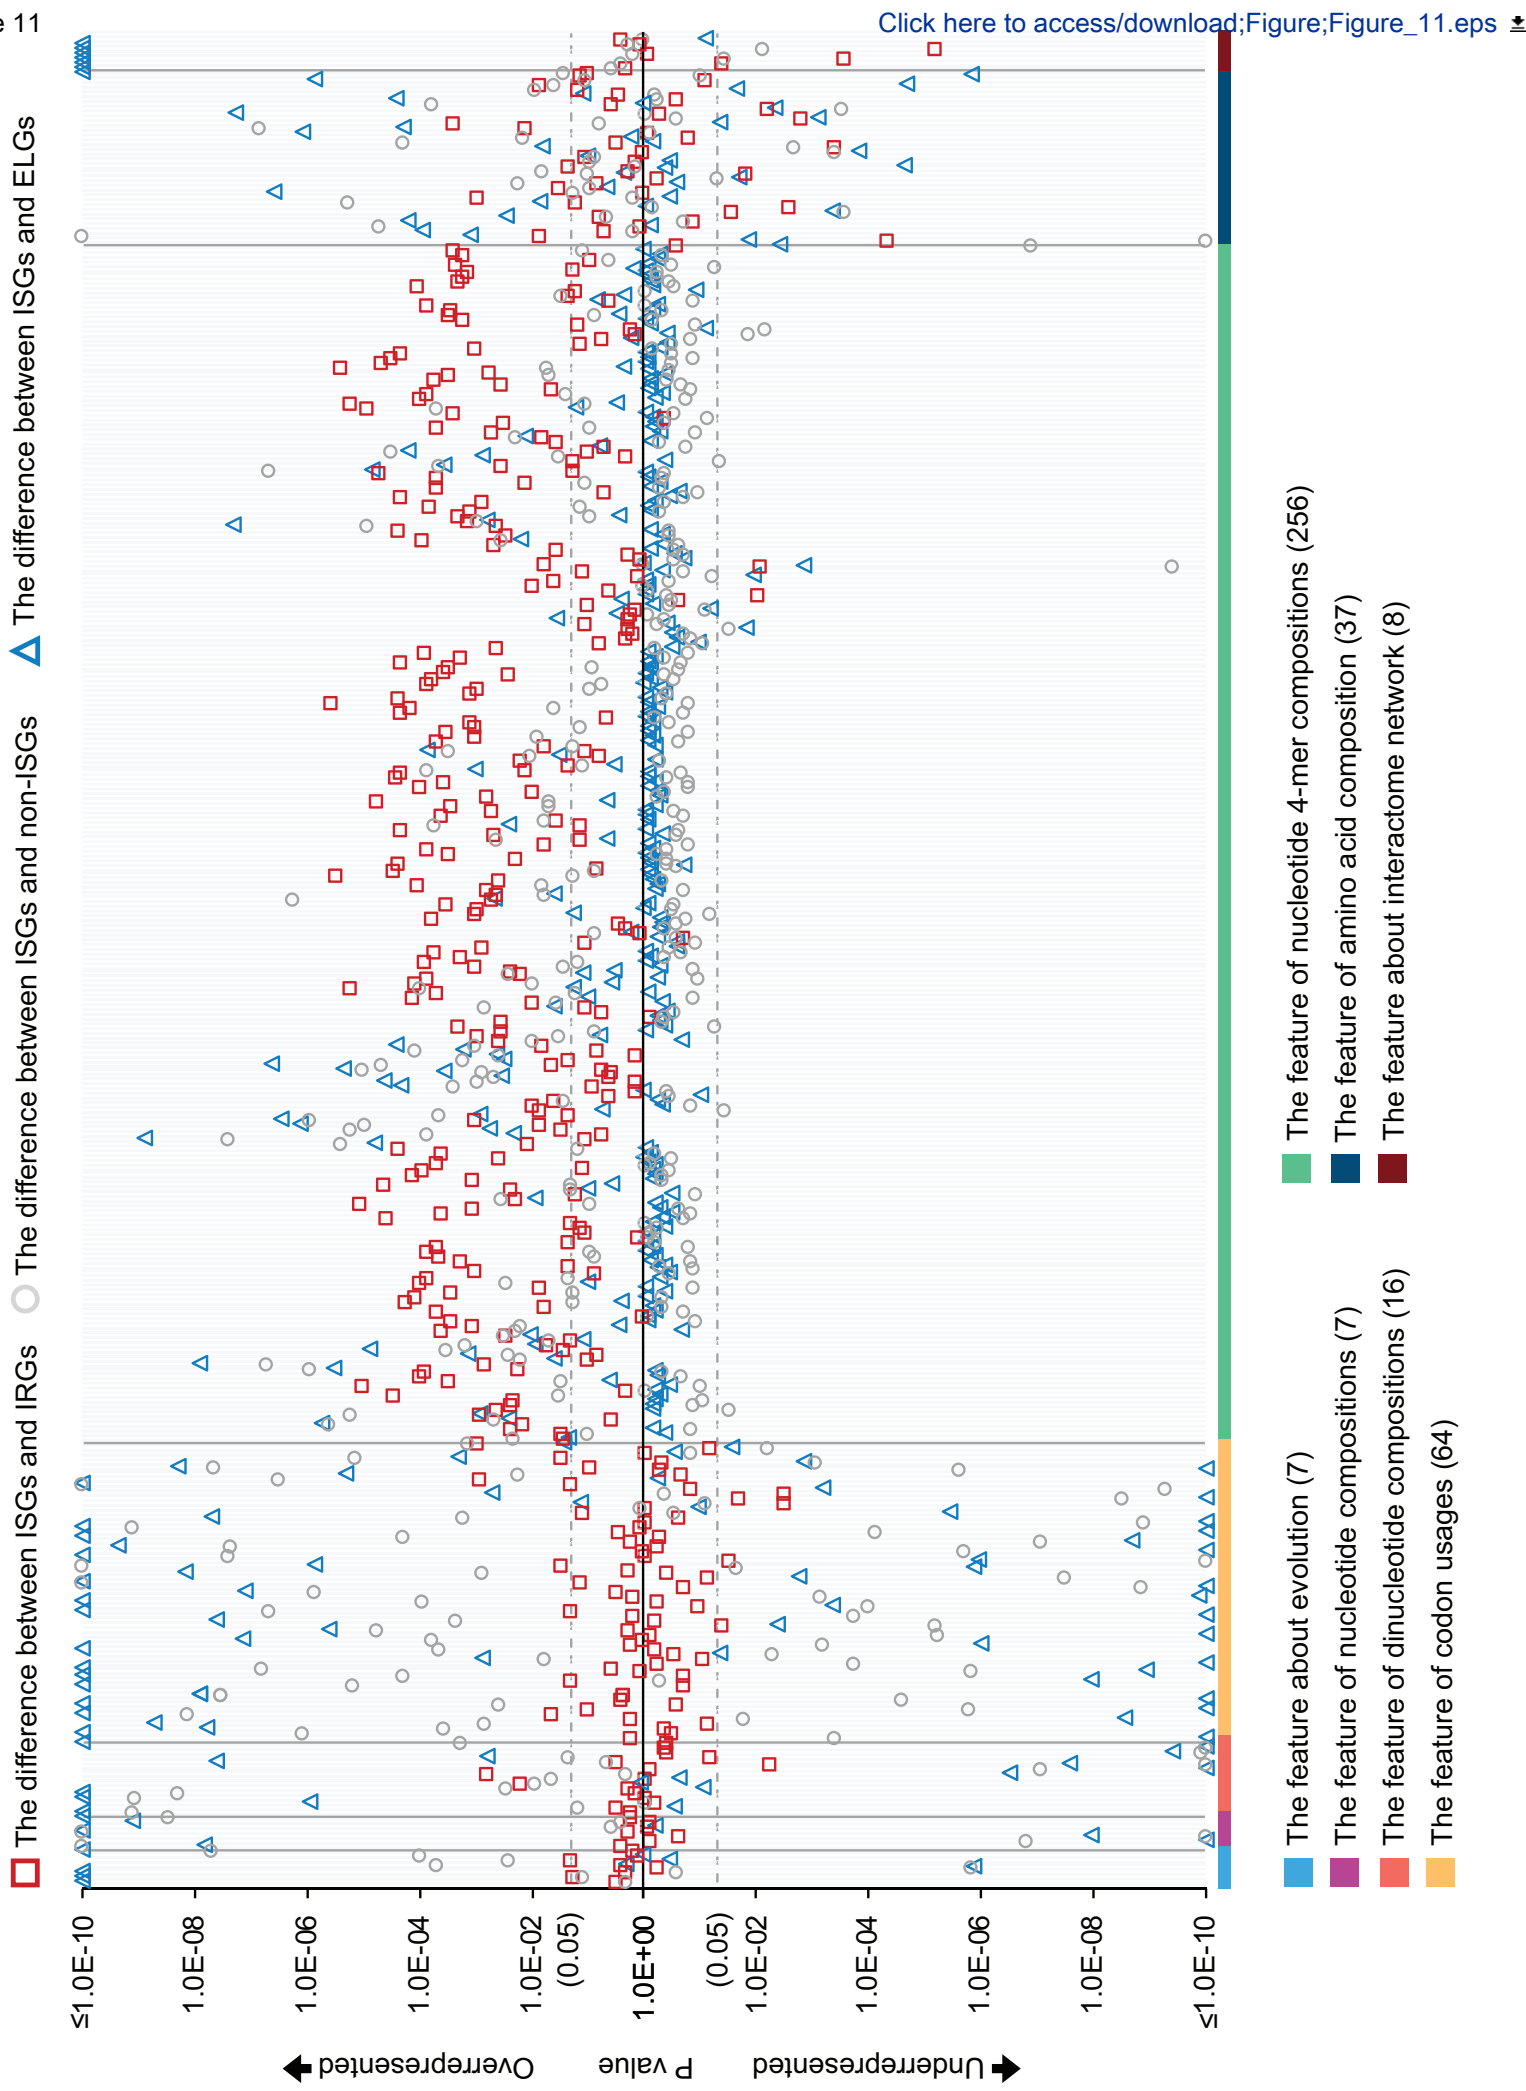



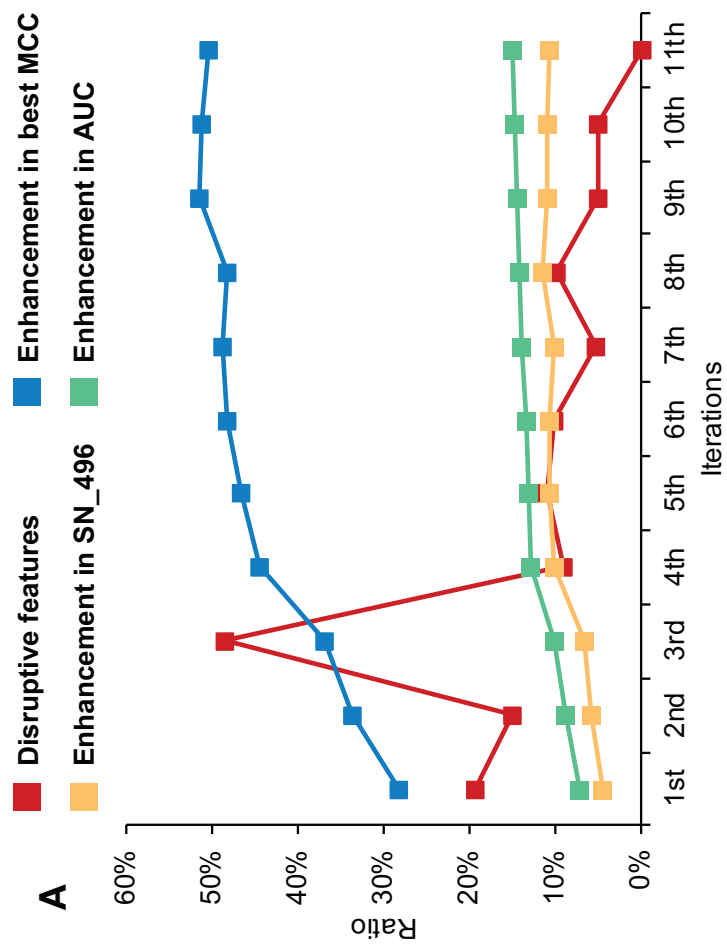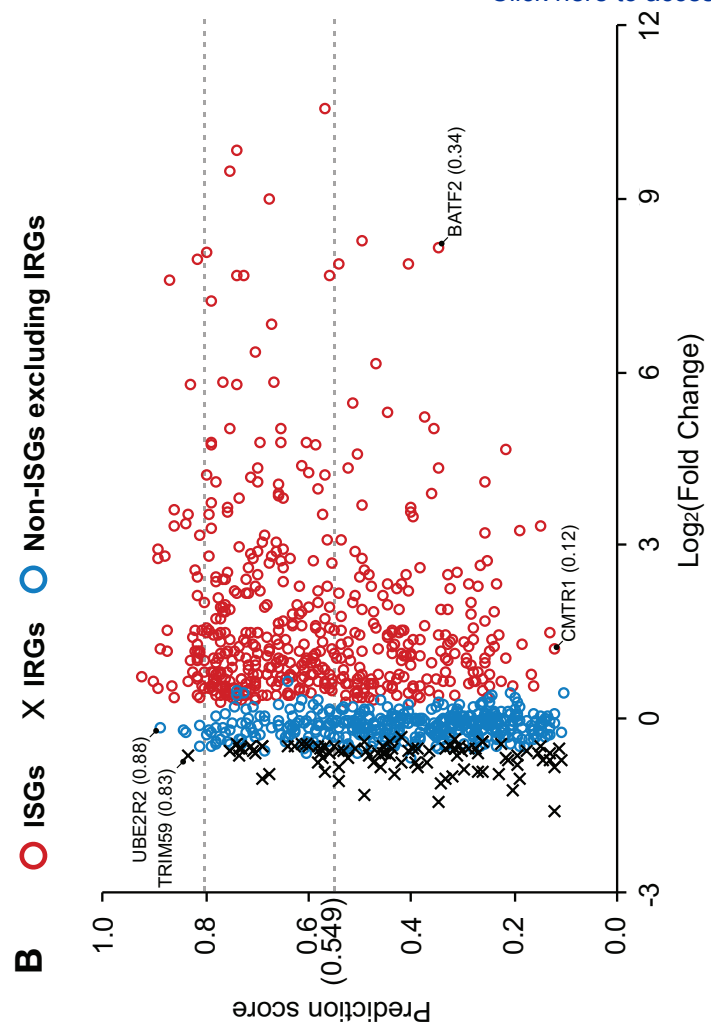

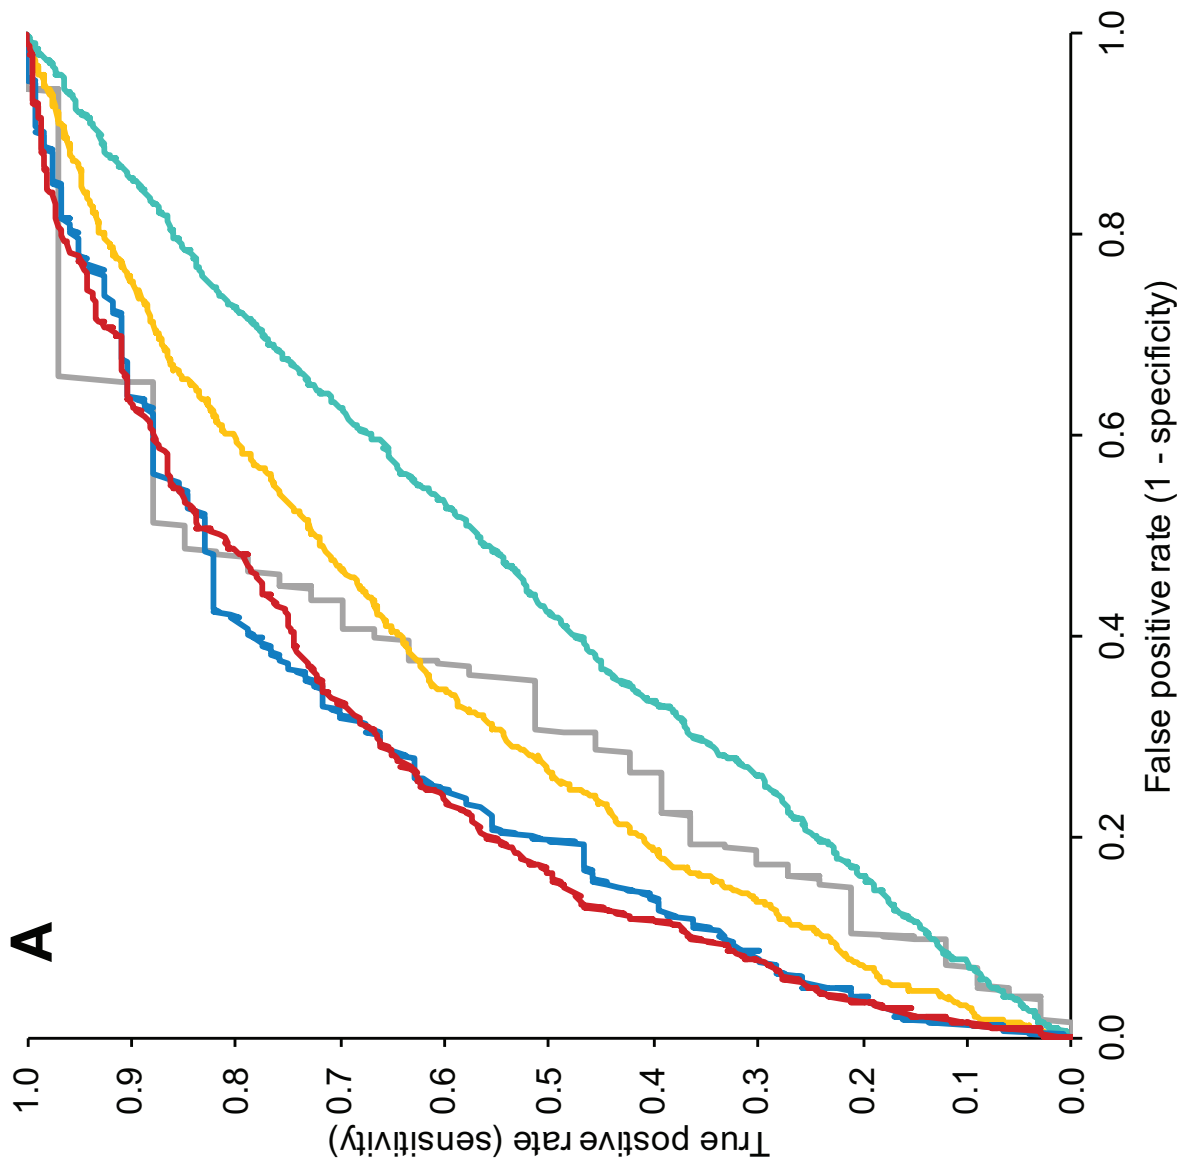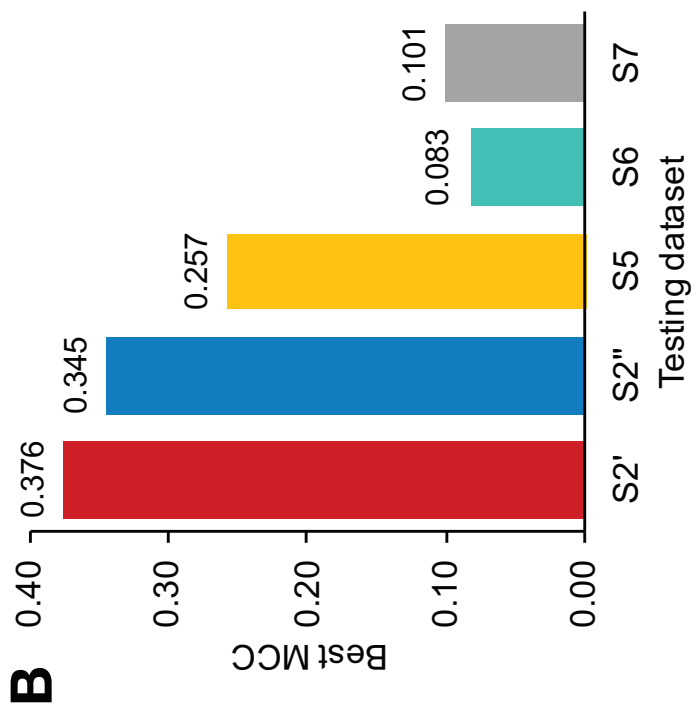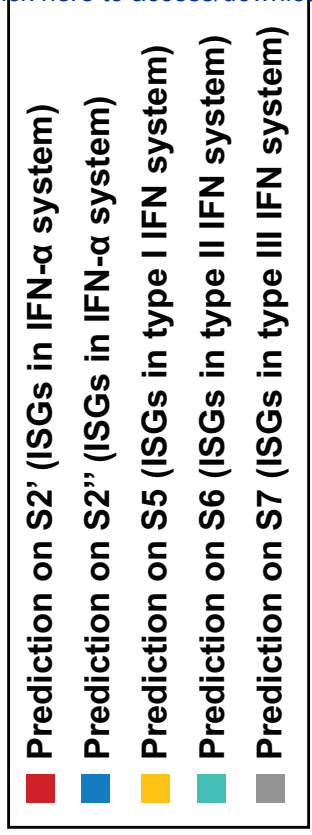

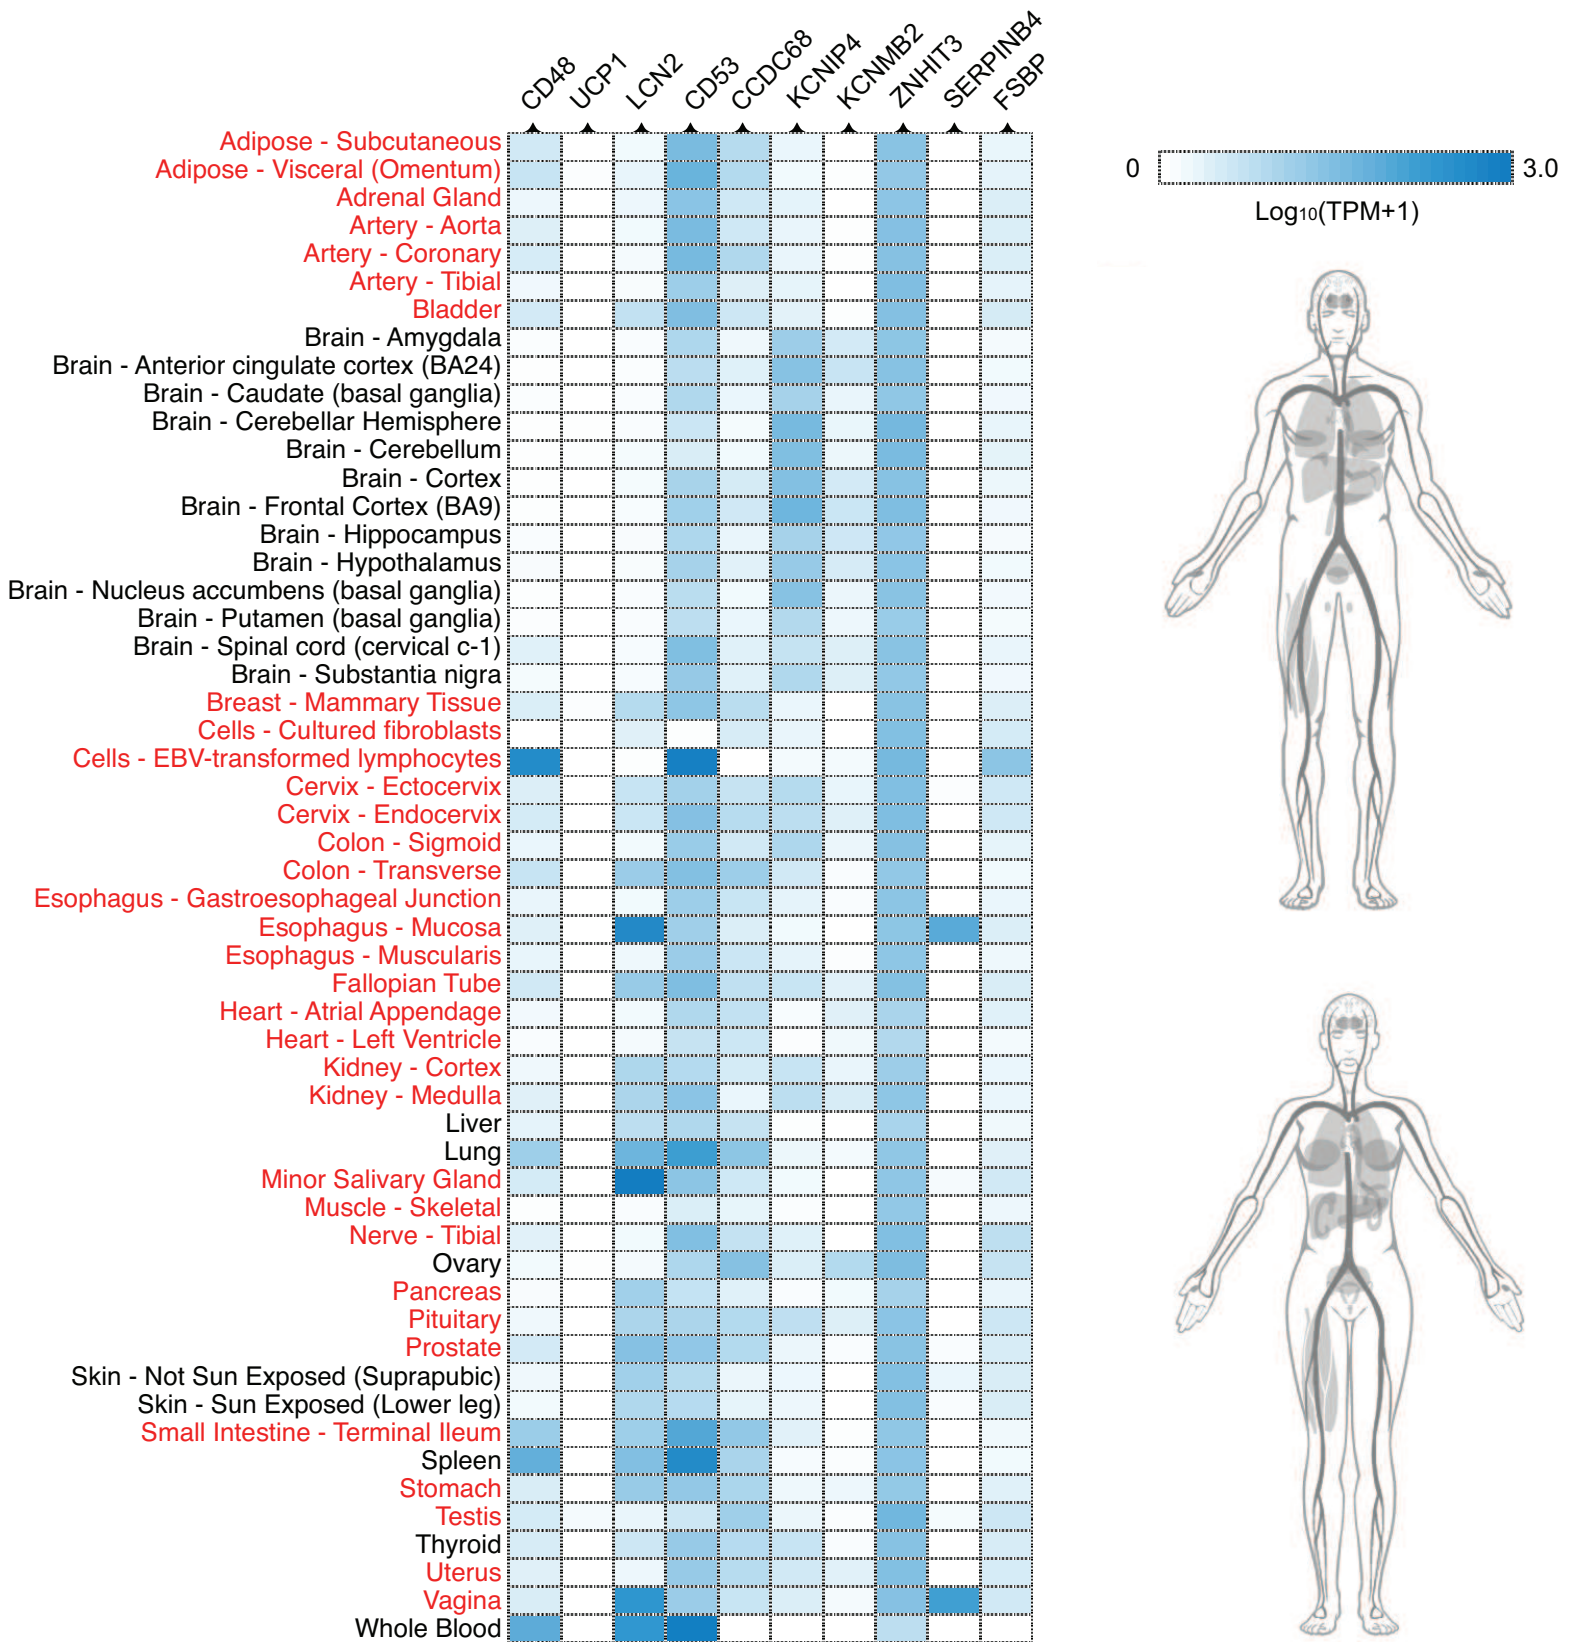

**BEGIN**

**Initialisation:** Balanced dataset  $S_0 = \{(1, v_1^0), \dots, (1, v_n^0), (0, v_{n+1}^0) \dots (0, v_{2n}^0)\}$ , dimension of the feature vector  $D_0$ , machine learning algorithm  $A$ , number of disruptive feature  $d_0 = D_0$ , and iteration round  $i = 0$ .

**While  $d_0 > 0$  ( $i^{th}$  iteration):**

- 1) Use five-fold cross validation on dataset  $S_i$ , prediction  $P_i = A(S_i)$ ;
- 2) Evaluate the  $P_i$  with the criterion of AUC;
- 3) Remove one feature from feature vector  $v^i$  and generate a temporary dataset  $T_i$ ;
- 4) Use five-fold cross validation on dataset  $T_i$ , prediction  $P'_i = A(T_i)$ ;
- 5) Evaluate the  $P'_i$  with the criterion of AUC;
- 6) Repeat 4) and 5) for the traversal of  $D_i$  features;
- 7) Traverse  $v^i$  and remove  $m$  features helpful to improve AUC of  $P'_i$ ,  $d_i = m$ ;
- 8) Update dataset  $S_{i+1} = \{(1, v_1^{i+1}), \dots, (1, v_n^{i+1}), (0, v_{n+1}^{i+1}) \dots (0, v_{2n}^{i+1})\}$ ,  $D_{i+1} = D_i - m$ .

**End**

**Output:** dataset  $S_{i-1}$  encoded by  $D_{i-1}$  features.

**END**

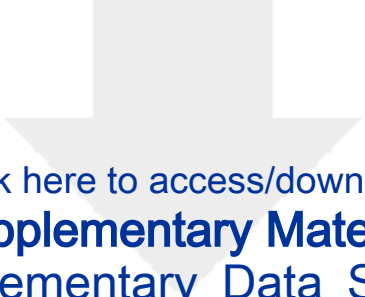

Click here to access/download  
**Supplementary Material**  
Supplementary\_Data\_S1.csv





Click here to access/download  
**Supplementary Material**  
Supplementary\_Data\_S2.csv



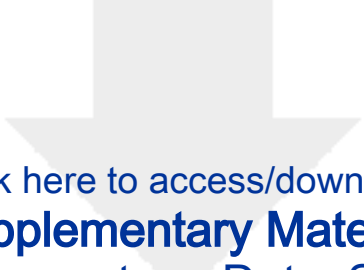

Click here to access/download  
**Supplementary Material**  
Supplementary\_Data\_S3.csv





Click here to access/download  
**Supplementary Material**  
Supplementary\_Data\_S4.csv





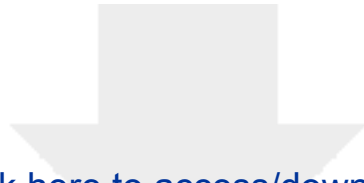

Click here to access/download  
**Supplementary Material**  
Supplementary\_Data\_S5.txt

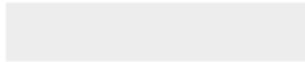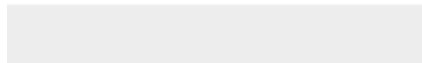

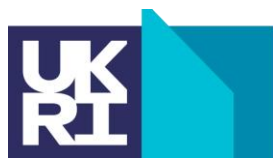

Medical  
Research  
Council

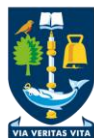

University  
of Glasgow

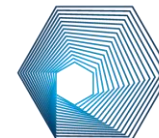

CVR  
Centre for  
Virus Research

Editors

GigaScience

24<sup>th</sup> Feb 2022

Dear Editors

On behalf of my co-authors please consider our research article entitled ‘Defining the characteristics of interferon-alpha-stimulated human genes: insight from expression data and machine learning’ for consideration in your journal. We present systematic data analyses on large-scale features to characterise the association between the response of human genes to interferons- $\alpha$  (IFN- $\alpha$ ) and their inherent properties. Our results show that the up-regulated interferon- $\alpha$  stimulated genes (ISGs) differentially represent many features that make them distinguishable from those not significantly up-regulated (non-ISGs) in the presence of IFN- $\alpha$ . We find that the IFN- $\alpha$  repressed human genes (IRGs) have some shared properties with the ISGs. We apply machine learning ideas with an original feature selection strategy to prove the predictability of the ISGs. Our prediction method is implemented as a web server at <http://isgpre.cvr.gla.ac.uk/>. The source code, prediction model, and all feature profiles are released at <https://github.com/HChai01/ISGPRE> for reproducible use. We believe our article will be of interest to the international research community, and thus will be of interest to your readership. We confirm that this manuscript has not been published elsewhere, is not under consideration by any other journal, and that all authors have read and approved the submission of the manuscript.

Yours Sincerely,

Joseph Hughes
