# Supplementary material for: Defining the characteristics of interferon-alpha–stimulated human genes: insight from expression data and machine learning
Source: PubMed Central journal article supplement (PMC9673497; doi:10.1093/gigascience/giac103), 2022-11-18
Supplement: giac103_giga-d-22-00042_revision_1.pdf [file giac103_giga-d-22-00042_revision_1.pdf]

# GigaScience

## Defining the characteristics of interferon-alpha-stimulated human genes: insight from expression data and machine-learning --Manuscript Draft--

|                                                      |                                                                                                                                                                                                                                                                                                                                                                                                                                                                                                                                                                                                                                                                                                                                                                                                                                                                                                                                                                                                                                                                                                                                                                                                                                                                                                                                                                                                                                                                                                                                                                                                                                                                                                                                                                                                                                                                                                                                                                                                                                                                                               |                         |
|------------------------------------------------------|-----------------------------------------------------------------------------------------------------------------------------------------------------------------------------------------------------------------------------------------------------------------------------------------------------------------------------------------------------------------------------------------------------------------------------------------------------------------------------------------------------------------------------------------------------------------------------------------------------------------------------------------------------------------------------------------------------------------------------------------------------------------------------------------------------------------------------------------------------------------------------------------------------------------------------------------------------------------------------------------------------------------------------------------------------------------------------------------------------------------------------------------------------------------------------------------------------------------------------------------------------------------------------------------------------------------------------------------------------------------------------------------------------------------------------------------------------------------------------------------------------------------------------------------------------------------------------------------------------------------------------------------------------------------------------------------------------------------------------------------------------------------------------------------------------------------------------------------------------------------------------------------------------------------------------------------------------------------------------------------------------------------------------------------------------------------------------------------------|-------------------------|
| <b>Manuscript Number:</b>                            | GIGA-D-22-00042R1                                                                                                                                                                                                                                                                                                                                                                                                                                                                                                                                                                                                                                                                                                                                                                                                                                                                                                                                                                                                                                                                                                                                                                                                                                                                                                                                                                                                                                                                                                                                                                                                                                                                                                                                                                                                                                                                                                                                                                                                                                                                             |                         |
| <b>Full Title:</b>                                   | Defining the characteristics of interferon-alpha-stimulated human genes: insight from expression data and machine-learning                                                                                                                                                                                                                                                                                                                                                                                                                                                                                                                                                                                                                                                                                                                                                                                                                                                                                                                                                                                                                                                                                                                                                                                                                                                                                                                                                                                                                                                                                                                                                                                                                                                                                                                                                                                                                                                                                                                                                                    |                         |
| <b>Article Type:</b>                                 | Research                                                                                                                                                                                                                                                                                                                                                                                                                                                                                                                                                                                                                                                                                                                                                                                                                                                                                                                                                                                                                                                                                                                                                                                                                                                                                                                                                                                                                                                                                                                                                                                                                                                                                                                                                                                                                                                                                                                                                                                                                                                                                      |                         |
| <b>Funding Information:</b>                          | Medical Research Council (MC_UU_1201412)                                                                                                                                                                                                                                                                                                                                                                                                                                                                                                                                                                                                                                                                                                                                                                                                                                                                                                                                                                                                                                                                                                                                                                                                                                                                                                                                                                                                                                                                                                                                                                                                                                                                                                                                                                                                                                                                                                                                                                                                                                                      | Prof David L. Robertson |
|                                                      | China Scholarship Council (201706620069)                                                                                                                                                                                                                                                                                                                                                                                                                                                                                                                                                                                                                                                                                                                                                                                                                                                                                                                                                                                                                                                                                                                                                                                                                                                                                                                                                                                                                                                                                                                                                                                                                                                                                                                                                                                                                                                                                                                                                                                                                                                      | Mr Haiting Chai         |
| <b>Abstract:</b>                                     | <p><b>Background:</b> A virus-infected cell triggers a signalling cascade resulting in the secretion of interferons (IFNs). It in turn induces the up-regulation of the IFN stimulated genes (ISGs) that play anti-pathogen roles in host defenses. Here, we conducted analyses on large-scale data relating to evolution, gene expression, sequence compositions, and network properties to elucidate factors associated with the stimulation of human genes in response to the typical IFN-<math>\alpha</math>.</p> <p><b>Results:</b> We propose that the ISGs are less evolutionary conserved than genes that are not significantly stimulated in IFN experiments (non-ISGs). ISGs show obvious depletion of GC-content in the coding region, leading to differential representations in their sequence compositions. The IFN repressed human genes (IRGs), which are down-regulated in IFN experiments can have similar properties to the ISGs. Additionally, we also design a machine-learning framework integrating the support vector machine and novel feature selection algorithm. It achieves an area under the receiver operating characteristic curve (AUC) of 0.7455 for the ISG prediction and demonstrates the similarity between the ISGs triggered by type I and III IFNs.</p> <p><b>Conclusions:</b> The ISGs have unique properties that make them different from the non-ISGs. Some of them have strong correlations with genes' expression following IFN-<math>\alpha</math> stimulations. which can be used as good features in machine learning. Our model predicts several genes as potential ISGs that so far have shown no significant differential expression when stimulated with IFN-<math>\alpha</math> in the cell/tissue types in the available databases. A webserver implementing our method is accessible at <a href="http://isgpre.cvr.gla.ac.uk/">http://isgpre.cvr.gla.ac.uk/</a> . The docker image at <a href="https://hub.docker.com/r/hchai01/isgpre">https://hub.docker.com/r/hchai01/isgpre</a> can be downloaded to reproduce the analysis.</p> |                         |
| <b>Corresponding Author:</b>                         | Joseph Hughes<br>University of Glasgow Centre for Virus Research<br>Glasgow, Glasgow UNITED KINGDOM                                                                                                                                                                                                                                                                                                                                                                                                                                                                                                                                                                                                                                                                                                                                                                                                                                                                                                                                                                                                                                                                                                                                                                                                                                                                                                                                                                                                                                                                                                                                                                                                                                                                                                                                                                                                                                                                                                                                                                                           |                         |
| <b>Corresponding Author Secondary Information:</b>   |                                                                                                                                                                                                                                                                                                                                                                                                                                                                                                                                                                                                                                                                                                                                                                                                                                                                                                                                                                                                                                                                                                                                                                                                                                                                                                                                                                                                                                                                                                                                                                                                                                                                                                                                                                                                                                                                                                                                                                                                                                                                                               |                         |
| <b>Corresponding Author's Institution:</b>           | University of Glasgow Centre for Virus Research                                                                                                                                                                                                                                                                                                                                                                                                                                                                                                                                                                                                                                                                                                                                                                                                                                                                                                                                                                                                                                                                                                                                                                                                                                                                                                                                                                                                                                                                                                                                                                                                                                                                                                                                                                                                                                                                                                                                                                                                                                               |                         |
| <b>Corresponding Author's Secondary Institution:</b> |                                                                                                                                                                                                                                                                                                                                                                                                                                                                                                                                                                                                                                                                                                                                                                                                                                                                                                                                                                                                                                                                                                                                                                                                                                                                                                                                                                                                                                                                                                                                                                                                                                                                                                                                                                                                                                                                                                                                                                                                                                                                                               |                         |
| <b>First Author:</b>                                 | Haiting Chai                                                                                                                                                                                                                                                                                                                                                                                                                                                                                                                                                                                                                                                                                                                                                                                                                                                                                                                                                                                                                                                                                                                                                                                                                                                                                                                                                                                                                                                                                                                                                                                                                                                                                                                                                                                                                                                                                                                                                                                                                                                                                  |                         |
| <b>First Author Secondary Information:</b>           |                                                                                                                                                                                                                                                                                                                                                                                                                                                                                                                                                                                                                                                                                                                                                                                                                                                                                                                                                                                                                                                                                                                                                                                                                                                                                                                                                                                                                                                                                                                                                                                                                                                                                                                                                                                                                                                                                                                                                                                                                                                                                               |                         |
| <b>Order of Authors:</b>                             | Haiting Chai                                                                                                                                                                                                                                                                                                                                                                                                                                                                                                                                                                                                                                                                                                                                                                                                                                                                                                                                                                                                                                                                                                                                                                                                                                                                                                                                                                                                                                                                                                                                                                                                                                                                                                                                                                                                                                                                                                                                                                                                                                                                                  |                         |
|                                                      | Quan Gu                                                                                                                                                                                                                                                                                                                                                                                                                                                                                                                                                                                                                                                                                                                                                                                                                                                                                                                                                                                                                                                                                                                                                                                                                                                                                                                                                                                                                                                                                                                                                                                                                                                                                                                                                                                                                                                                                                                                                                                                                                                                                       |                         |
|                                                      | David L. Robertson                                                                                                                                                                                                                                                                                                                                                                                                                                                                                                                                                                                                                                                                                                                                                                                                                                                                                                                                                                                                                                                                                                                                                                                                                                                                                                                                                                                                                                                                                                                                                                                                                                                                                                                                                                                                                                                                                                                                                                                                                                                                            |                         |
|                                                      | Joseph Hughes                                                                                                                                                                                                                                                                                                                                                                                                                                                                                                                                                                                                                                                                                                                                                                                                                                                                                                                                                                                                                                                                                                                                                                                                                                                                                                                                                                                                                                                                                                                                                                                                                                                                                                                                                                                                                                                                                                                                                                                                                                                                                 |                         |
| <b>Order of Authors Secondary Information:</b>       |                                                                                                                                                                                                                                                                                                                                                                                                                                                                                                                                                                                                                                                                                                                                                                                                                                                                                                                                                                                                                                                                                                                                                                                                                                                                                                                                                                                                                                                                                                                                                                                                                                                                                                                                                                                                                                                                                                                                                                                                                                                                                               |                         |

**Response to Reviewers:**

Comments from Reviewer #1:

In this manuscript, the authors analyzed different characteristics that are potentially related to the expression of human genes under IFN- $\alpha$  stimulation. A classification model is built to predict ISG (genes that are upregulated following IFN- $\alpha$  stimulation) from the human fibroblast cell. The model also performs feature selection, and the authors used different test sets (on different types of IFN) to validate their model. The authors provide a web server that implemented this machine learning model.

-----

Key comment 1: I liked the introduction, the background and motivation were clear. However, the Results section was a bit hard to follow, in particular the implementation of the machine learning models, with different classifiers applied inconsistently across distinct feature sets.

Our reply: Thanks for the suggestions. We have changed the structure of the results section and added some appendices to enhance the readability of our manuscript.

Table 3 now includes two main parts:

- 1) comparison of different machine learning methods (KNN, RF and SVM);
- 2) comparison of SVM classifiers optimised by different feature selection strategies (FFS and ASI);

Due to the rationale behind random forest, the final number of features shown in Table 3 is not 518. The result of the first comparison proves the effectiveness of SVM. The result of the second comparison proves the effectiveness of our feature selection strategy (see Figure 15). We have amended the structure of Table 3 to make it more understandable.

-----

Key comment 2: Regarding reproducibility, the authors provide a Github repository with source code, the model trained and data. From the documentation and notes in the manuscript (lines 1015-1023), looks like this can only be run on mac OS, which makes it very hard for me to test (I'm a Linux user). I recommend the authors to read and follow the article "Reproducibility standards for machine learning in the life sciences" (<https://doi.org/10.1038/s41592-021-01256-7>). Having, for instance, a Docker image to download and run your analyses would be fantastic.

Our reply: Thanks for your comments. We have added a Docker implementation for our machine learning method. The image is available at <https://hub.docker.com/r/hchai01/isgpre>. Instructions can be found at our GitHub repository (<https://github.com/HChai01/ISGPRES>).

-----

Key comment 3: The authors perform a comprehensive analysis of features that differentiate different gene classes. I wonder why didn't they use first a machine learning model to automatically find these important features, and then try to analyse which features were selected (instead of the other way around as done in the study). I think there is perhaps too much manual feature engineering in the previous steps of training an ML model.

Our reply: Thanks for the comment. The analyses and machine learning are separated in our project. In the analyses, we aim to find as many 'important' features as possible but in the machine learning, we aim to find an optimal way to classify the considered classes with limited information. It should be noted that some samples used for feature analyses were not included in the training or modelling stage as they were randomly selected for independent testing (see the newly added Figure 2). Such random sampling procedures will change the distribution of the features, especially those for the major class (non-ISGs), which means the feature processed in the machine learning stage is not the same as the one used in the analysis stage. In other word, the feature distribution of samples used for training can't truly reflect the natural distribution of the considered classes. Some key insights may be missed if we first use machine learning models to find 'important' features for later analyses. Lastly, we have optimised our machine learning pipeline to make it easy to follow.

-----

Key comment 4: Related to the previous point, in my comments below one of my

concerns is about feature correlation. The authors compare individual features regarding their ability to separate different gene classes (ISG vs background vs non-ISG). But one can imagine that some features are highly correlated. Some features might not be useful to separate gene classes from a single-feature analysis (as the authors do at the beginning), but they could be useful in combination with other features. Unless I'm missing an important point, I would leave the machine learning model to learn this and then analyze each feature individually after the model identifies them.

Our reply: Yes, you are right. The combination of some features can contribute to separate gene classes. Machine learning models do help to identify this. Features with high importance in machine learning have a higher chance to have differential distribution in nature but it is not guaranteed due to random sampling. On the other hand, features with better discrimination in analyses may have a higher chance to enhance the quality of the machine learning model but it is also not guaranteed (see Figure 9-11 & Table 4). The clues shown in both analyses and machine learning can further highlight some features that make a gene stimulated under IFN-alpha. However, it is not a good reason to ignore the contribution of some features in identifying ISGs just because they are not performing well in the machine learning stage. It is acceptable to put the machine learning before or after the feature analyses. We put feature analyses first because this paper is mainly focused on finding out what changes the expression of a human gene following IFN-alpha stimulation. Machine learning is our strategy to see if some features can be used to identify ISGs in a high-throughput way.

-----

Key comment 5: Authors are concerned that including too many features in the support vector machine (SVM) model would complicate the prediction task. To remedy this, they manually select the features according to, in my opinion, a more subjective criterion. Why didn't the authors use a feature selection algorithm here? I know that they propose a model including feature selection, but I guess I don't understand well all the previous manual feature analyses. Using a known feature selection method here would provide a more data-driven approach to improve classification, in addition to their manual expert curation (which is also valid).

Our reply: Thanks for the suggestion. We have added the comparison among different feature selection strategies to prove the effectiveness of ours.

-----

Key comment 6: They run several classification models, but not consistently across the same set of features. For example, only SVM is run across genetic, parametric, all features, etc, but not the other models. Why is that?

Our reply: Thanks for the comments. As previously mentioned, the comparisons shown in Table 3 first identify which base machine learning method performs best. We then use the best-performing method (SVM) to test the performance of different feature sets. We have amended the structure of Table 3 to make it easier to understand.

-----

Key comment 7: The manuscript would really benefit from a figure with the main steps of the analyses performed, models tested, datasets employed, etc. It's hard to get the big picture as it is now.

Our reply: Thanks for your suggestion. We have added a figure to show this (see new Figure 2).

-----

Key comment 8: I think the window size used (mentioned in the text) should be added to the Figure 2 caption.

Our reply: Thanks for your suggestion. We have added it to the caption (see new Figure 3).

Key comment 9: \* What's the vertical dashed line? In the text, you say that those at the left of this line are IRGs, but I don't understand the meaning of that vertical line (-0.9 log fold change). This explanation, which I didn't see, should be added to the figure caption also.

Our reply: Thanks for the comment. In our collected data, the log fold change of IRGs are all lower than -0.9. That's why we mentioned 'that those at the left of this line are IRGs'. We have updated the figure and divided each plot into three regions. All data points in the left region come from IRGs ( $\text{Log}_2(\text{FoldChange}) < -0.871$ ); points in the right region all come from ISGs ( $\text{Log}_2(\text{FoldChange}) > 0.686$ ); points in the middle region may come from ISGs or non-ISGs (including IRGs).

Key comment 10: From the text, I understand that in the subfigures in Figure 2 you have IRGs, non-ISGs and ISGs. Would it be possible, or meaningful for the reader, to add an extra vertical line to separate them?

Our reply: Thanks for the comment. Current vertical line ( $x=-0.871$ ) is used to separate some but not all IRGs. We have added a new vertical line to separate some ISGs ( $x=0.686$ ). However, the source of data points in the region between  $x=-0.871$  and  $x=0.686$  are complex. They may come from ISGs or non-ISGs (including IRGs). We have added some description in the figure caption.

Key comment 11: If GC-content is underrepresented in ISGs more than non-ISGs, the ApT and TpA should be expected to be more enriched in ISGs, right? Sounds like a redundant analysis. I would expect these two sequence-derived features to be correlated. If this is the case, maybe it would be better to highlight other features instead of a correlated/expected one?

Our reply: Thanks for the suggestion. The depletion of GC-content in ISGs has some impacts on the representation of dinucleotide composition, codon usages and amino acid composition. We expect the representations of some GC-related features may be underrepresented but we cannot tell more unless those features were analysed. For instance, it's hard to tell whether the depletion of CpG or GpC is more important to the stimulation of human genes under IFN-alpha. Therefore, these analyses are not redundant as long as they are not completely the same (e.g., GC-content, CG-content or AT-content).

Key comment 12: Figure 4: here the authors divided the parametric set of features into four categories and compared their representations among ISGs, non-ISGs and background genes. The figure shows p-values of the tests on the y-axis, and the four categories of features on the x-axis. I think it's important to run a negative control: could you please run these tests again, say, 100 times, with gene IDs/names shuffled, and check whether some of these results also appear in these null simulations? Maybe you can keep the same figure but remove those also found in the null simulations.

Our reply: Thanks for the comments. First of all, the red squares in this figure (now Figure 5) show the comparisons of some genome-based features between the stimulated class (ISGs) and non-stimulated class (non-ISGs). The blue triangles are also placed in the same figure as the restriction of filtering 'high confident' non-ISGs may also have some impacts to form a 'special' distribution differential to ISGs'. We figure that the negative control may not be helpful here as the features we analysed are all inherent thus will not change due to the impact of IFN-treatment. We do have some samples with almost invisible changes in the experiments. They are called ELGs and the comparison between ELGs and ISGs are shown in Figure 11. We have updated the caption of the figure to make it easier to understand.

Key comment 13: Is it possible that the comparison of codons frequencies (third category of features) is correlated with previous findings (like GC content or ApT/TpA enrichment)? If so, would it be possible that maybe the analysis is also expected or redundant? For example, in ISGs there is an underrepresentation of GC-content, and

you also found that ISGs there is an underrepresentation of "CAG" codons. I might be missing something, but aren't these expected to be correlated?

Our reply: Yes, you are right. The codon usages are influenced by the nucleotide composition in the CDs. The analysis can be expected but is not redundant. As we mentioned in the reply to your key comment 11, we aim to have better understanding of each feature rather than expecting that they are over- or under-represented in ISGs.

-----  
Key comment 14: Figure 6: I would suggest adding the same negative control suggested before.

Our reply: Thanks for the comments. We believe the negative control may not be helpful here as the representation of features are not influenced by the IFN experiments.

-----  
Key comment 15: I think it's important to define what are all those eight features in the network analyses (closeness, betweenness, etc), otherwise it's hard to follow what comes next.

Our reply: Yes, you are right. We have already provided this information in the Method Section: 'Generation of discrete features'. Please check the last paragraph of that section for details.

-----  
Key comment 16: Figures 9 and 10: it would be good to add the sign of the correlation in the figure, in addition to mentioning it in the caption (as it is now).

Our reply: Thanks for your suggestion. We have corrected the figure about negative correlation (see new Figure 11). The sign now can be found in the y-axis. We have also added some description in the figure caption. Please check new Figure 10/11 for details.

-----  
Key comment 17: Given the unique patterns or differences between non-ISG class and IRG class, wouldn't it be better to perform different analyses excluding IRG genes? The authors also acknowledge these risks in lines 539-541.

Our reply: Thanks for your suggestion. However, the main focus of the current paper is to identify what makes a human gene stimulated in the presence of IFN-alpha. The investigation of IRGs is a side analysis to show that it does not influence the definition of a 'null stimulation'.

-----  
Key comment 18: It was hard for me to understand the workflow in this section: you used different machine learning models applied to distinct features sets, for example. Why don't you apply the same set of models to the same set of features? I think this section needs an initial paragraph with a global description of what you are trying to do.

Our reply: Thanks for your suggestion. The workflow in this section is: 1) find the best-performed base method; 2) find the optimal feature set; 3) train the machine learning model with the best-performing base method and optimal feature set. The final model is then used for testing the 7 test datasets mentioned in Table 5. We have added a global description at the beginning of this section to make it easier to follow.

-----  
Key comment 19: For example, I don't think I understand very well the concept of "disruptive feature". What does it mean?

Our reply: Thanks for the comments. A feature is identified as 'disruptive' if the overall performance of the classifier becomes worse after being added. We have changed it to 'noisy' in the hope that this is more understandable.

Key comment 20: Table 3: I don't understand the threshold selection here. I guess you refer to classification or decision threshold from a model that outputs a probability of a gene to be ISG or non-ISG. First, I think there should be a line separating each performance measure to clearly show those that are "Threshold-dependent" and "Threshold independent"

Our reply: Yes, you are right. Thanks for the suggestion. We have added a line to separate the threshold-dependent and threshold-independent criteria.

-----

Key comment 21: I also understand that, during cross-validation, you selected for each model/feature set combination, the threshold that maximized the MCC (this is explained in Table 3 as a footnote, but it should be more explicitly mentioned in the text).

Our reply: Thanks for the suggestion. We have added some description for it.

-----

Key comment 22: Table 3: What is the "Optimum" set of features? Why is this "Optimum set" only used with SVM?

Our reply: Thanks for the comments. The 'optimum' set of features are generated via our feature selection scheme (Figure 16). The workflow in this section is first identify the best-performing machine learning method then use it (SVM) with the feature selection strategy to identify the 'optimal' feature set (No.=74). We have added some further description in the footnote of Table 3.

-----

Key comment 23: How does the "AUC-driven subtractive iteration algorithm (ASI)" compare with other feature selection algorithms.

Our reply: Thanks for the comments. Our feature selection method is developed based on the 'Backward Feature Elimination' scheme. We have compared it with another important Sequential Feature Selection method: 'Forward Feature Selection' scheme. Please check Table 3 and Results section: 'Implementation with machine learning framework' for details.

-----

Key comment 24: Table 5: you mention this in the text, but it would be good to have an extra column indicating which datasets were used for training and which are for testing.

Our reply: Thanks for the suggestion. We have reshuffled the structure of Table 5 to make this clear.

-----

Key comment 25: Figure 13: it would be good to have the AUROC in the figure, not only the curves.

Our reply: Thanks for the suggestion. We have added 'ROC' note in Figure 13.

-----

Comments from Reviewer #2:

First of all, this manuscript is well-written after a thorough research investigation. I enjoyed reading about interferons, interferon stimulating genes (ISGs), mechanisms and signalling pathways. In the introduction, the authors have highlighted the different methods (including other bioinformatics databases) available to identify ISGs and their potential pitfalls. This unmet need is addressed using in silico approaches which were used to classify interferon stimulating genes from non-stimulating ones in human fibroblast cells. Here, the authors have applied a combination of expression data and sequential/compositional features and designed a machine learning model for the prediction of ISGs from non-ISGs.

|                                                                                                                                                                                                                                                                                                                                                                                                                                    |                                                                                                                                                                                                                                                                                                                                                                                                                                                                                                                                                                                                                                                                                                                                                                                                                                                                                                                                                                                                                                                                                                                                                                                                                                                                                                                                                                                                                                                                                                                                                                                                                                                                                                                      |
|------------------------------------------------------------------------------------------------------------------------------------------------------------------------------------------------------------------------------------------------------------------------------------------------------------------------------------------------------------------------------------------------------------------------------------|----------------------------------------------------------------------------------------------------------------------------------------------------------------------------------------------------------------------------------------------------------------------------------------------------------------------------------------------------------------------------------------------------------------------------------------------------------------------------------------------------------------------------------------------------------------------------------------------------------------------------------------------------------------------------------------------------------------------------------------------------------------------------------------------------------------------------------------------------------------------------------------------------------------------------------------------------------------------------------------------------------------------------------------------------------------------------------------------------------------------------------------------------------------------------------------------------------------------------------------------------------------------------------------------------------------------------------------------------------------------------------------------------------------------------------------------------------------------------------------------------------------------------------------------------------------------------------------------------------------------------------------------------------------------------------------------------------------------|
|                                                                                                                                                                                                                                                                                                                                                                                                                                    | <p>Apart from features like duplication, alternative splicing, mutation and presence of multiple ORFs, the authors extracted various sequential features and found them to be correlated well with ISG prediction. For example, ISGs are prone to GC depletion and a significant difference in the codon usage among ISGs was found. In that context, the authors claim that ISGs are evolutionarily less conserved, codon usage features, genetic composition features, proteomic composition features and sequence patterns (especially like SLNPs and SLAAPs) are optimal parameters that can cumulatively help in differentiating ISGs from non-ISGs.</p> <p>When it comes to building a machine learning model, the authors faced challenges due to similarities between ISGs and IRGs. They have experimented using different algorithms for model building ranging from the decision tree, and random forest and found decent results with support vector machine.</p> <p>Key comment 1: Model Prediction accuracy was close to 70% for type I and III IFN and it performed below par when it comes to predicting ISGs activated by type II IFN system. There is scope to improvise the model prediction accuracy and extend its usage to type II IFN systems. If the authors could briefly add few points on how to improve the model accuracy and also highlight the application/impact of this work in their discussion, that would help scientists from other background to resonate with this manuscript.</p> <p>Our reply: Thanks for the suggestion. We have added some points on how to improve the model accuracy and highlighted the application/impact of this work in the discussion section.</p> |
| <b>Additional Information:</b>                                                                                                                                                                                                                                                                                                                                                                                                     |                                                                                                                                                                                                                                                                                                                                                                                                                                                                                                                                                                                                                                                                                                                                                                                                                                                                                                                                                                                                                                                                                                                                                                                                                                                                                                                                                                                                                                                                                                                                                                                                                                                                                                                      |
| <b>Question</b>                                                                                                                                                                                                                                                                                                                                                                                                                    | <b>Response</b>                                                                                                                                                                                                                                                                                                                                                                                                                                                                                                                                                                                                                                                                                                                                                                                                                                                                                                                                                                                                                                                                                                                                                                                                                                                                                                                                                                                                                                                                                                                                                                                                                                                                                                      |
| Are you submitting this manuscript to a special series or article collection?                                                                                                                                                                                                                                                                                                                                                      | No                                                                                                                                                                                                                                                                                                                                                                                                                                                                                                                                                                                                                                                                                                                                                                                                                                                                                                                                                                                                                                                                                                                                                                                                                                                                                                                                                                                                                                                                                                                                                                                                                                                                                                                   |
| <p><b>Experimental design and statistics</b></p> <p>Full details of the experimental design and statistical methods used should be given in the Methods section, as detailed in our <a href="#">Minimum Standards Reporting Checklist</a>. Information essential to interpreting the data presented should be made available in the figure legends.</p> <p>Have you included all the information requested in your manuscript?</p> | Yes                                                                                                                                                                                                                                                                                                                                                                                                                                                                                                                                                                                                                                                                                                                                                                                                                                                                                                                                                                                                                                                                                                                                                                                                                                                                                                                                                                                                                                                                                                                                                                                                                                                                                                                  |
| <p><b>Resources</b></p> <p>A description of all resources used, including antibodies, cell lines, animals and software tools, with enough information to allow them to be uniquely identified, should be included in the Methods section. Authors are strongly encouraged to cite <a href="#">Research Resource Identifiers</a> (RRIDs) for antibodies, model</p>                                                                  | Yes                                                                                                                                                                                                                                                                                                                                                                                                                                                                                                                                                                                                                                                                                                                                                                                                                                                                                                                                                                                                                                                                                                                                                                                                                                                                                                                                                                                                                                                                                                                                                                                                                                                                                                                  |



|                                                                                                                                                                                                                                                                                                                                                                                                                                                                                                                                                         |     |
|---------------------------------------------------------------------------------------------------------------------------------------------------------------------------------------------------------------------------------------------------------------------------------------------------------------------------------------------------------------------------------------------------------------------------------------------------------------------------------------------------------------------------------------------------------|-----|
| <p>organisms and tools, where possible.</p> <p>Have you included the information requested as detailed in our <a href="#">Minimum Standards Reporting Checklist?</a></p>                                                                                                                                                                                                                                                                                                                                                                                |     |
| <p><b>Availability of data and materials</b></p> <p>All datasets and code on which the conclusions of the paper rely must be either included in your submission or deposited in <a href="#">publicly available repositories</a> (where available and ethically appropriate), referencing such data using a unique identifier in the references and in the “Availability of Data and Materials” section of your manuscript.</p> <p>Have you have met the above requirement as detailed in our <a href="#">Minimum Standards Reporting Checklist?</a></p> | Yes |



# 1 **Defining the characteristics of interferon-alpha-stimulated human genes:** 2 **insight from expression data and machine-learning**

3

4 Haiting Chai<sup>1</sup>, Quan Gu<sup>1</sup>, David L. Robertson<sup>1,\*</sup>, Joseph Hughes<sup>1,\*</sup>

5

6 <sup>1</sup>MRC-University of Glasgow Centre for Virus Research, Glasgow, United Kingdom

7

8 \*[david.l.robertson@glasgow.ac.uk](mailto:david.l.robertson@glasgow.ac.uk), [joseph.hughes@glasgow.ac.uk](mailto:joseph.hughes@glasgow.ac.uk)

9

10

## 11 **Abstract**

12 **Background:** A virus-infected cell triggers a signalling cascade resulting in the secretion of  
13 interferons (IFNs), which in turn induces the up-regulation of the IFN stimulated genes (ISGs)  
14 that play a role in anti-pathogen host defence. Here, we conducted analyses on large-scale data  
15 relating to evolutionary, gene expression, sequence composition, and network properties to  
16 elucidate factors associated with the stimulation of human genes in response to IFN- $\alpha$ .

17 **Results:** We find that ISGs are less evolutionary conserved than genes that are not significantly  
18 stimulated in IFN experiments (non-ISGs). ISGs show obvious depletion of GC-content in the  
19 coding region. This influences the representation of some compositions following the  
20 translation process. IFN repressed human genes (IRGs), down-regulated genes in IFN  
21 experiments, can have similar properties to the ISGs. Additionally, we design a machine-  
22 learning framework integrating the support vector machine and novel feature selection  
23 algorithm that achieves an area under the receiver operating characteristic curve (AUC) of

24 0.7455 for ISG prediction. Its application in other IFN-systems suggests the similarity between  
25 the ISGs triggered by type I and III IFNs.

26 **Conclusions:** ISGs have unique properties that make them different from the non-ISGs. Some  
27 properties have strong correlations with genes' expression following IFN- $\alpha$  stimulations,  
28 which can be used as predictive features in machine learning. Our model predicts several genes  
29 as putative ISGs that so far have shown no significant differential expression when stimulated  
30 with IFN- $\alpha$  in the cell/tissue types in the available databases. A webserver implementing our  
31 method is accessible at <http://isgpre.cvr.gla.ac.uk/>. The docker image at  
32 <https://hub.docker.com/r/hchai01/isgpre> can be downloaded to reproduce the prediction.

33

34 **Key words:** anti-viral response, interferon, interferon stimulated genes, omics data analyses,  
35 machine-learning.

36

37

## 38 **Introduction**

39 Interferons (IFNs) are a family of cytokines defined for their capacity to interfere with viral  
40 replication. They are secreted from host cells after an infection by pathogens such as bacteria  
41 or viruses to trigger the innate immune response with the aim of inhibiting viral spread by  
42 'warning' uninfected cells [1]. The response induced by IFNs is rapid and feedforward, to  
43 synthesize new IFNs, which guarantees a full response even if the initial activation is limited  
44 [2]. In humans, several IFNs have been discovered (e.g. IFN- $\alpha/\beta/\epsilon/\kappa/\omega/\gamma/\lambda$  [3-8]). IFN- $\alpha$ , IFN-  
45  $\beta$ , IFN- $\epsilon$ , IFN- $\kappa$ , IFN- $\omega$  are grouped into type I IFNs for signalling through the common IFN-  
46  $\alpha$  receptor (IFNAR) complex present on target cells [3-6] (**Figure 1A**). IFN- $\alpha$  comprises 13  
47 subtypes in humans while the remaining type I IFNs are encoded by a specific gene [9]. IFN-  
48  $\lambda$  targets IFN- $\lambda$  receptor 1 (IFNLR1)/interleukin-10 receptor 2 (IL-10R2) and was classified as

49 type III IFN following its discovery in 2003 [8] (**Figure 1C**). Similar to type I IFNs, IFN- $\lambda$   
50 also exert antiviral properties but functions less intensely [10-12]. IFN- $\gamma$  is classified as type II  
51 IFN and manifests its biological effects by interacting with IFN- $\gamma$  receptor (IFNGR) [7]  
52 (**Figure 1B**). In contrast to type I and III IFNs, IFN- $\gamma$  is also anti-pathogen, immunomodulatory,  
53 and proinflammatory but more focused on establishing cell immunity [3,7,11,13].

54 All three types of IFNs are capable of activating the Janus kinase/signal transducer and  
55 activator of transcription (JAK-STAT) pathway and inducing the transcriptional up-regulation  
56 of approximately 10% of human genes that prime cells for stronger pathogen detections and  
57 defenses [9,14,15]. These up-regulated human genes are referred to as IFN-stimulated genes  
58 (ISGs). They play an important role in the establishment of the cellular antiviral state, inhibition  
59 of viral infection and return to cellular homeostasis [3,9,14,16]. For example, the ectopic  
60 expression of heparinase (HPSE) can inhibit the attachment of multiple viruses [17,18];  
61 interferon induced transmembrane proteins (IFITM) can impair the entry of multiple viruses  
62 and traffic viral particles to degradative lysosomes [19,20]; MX dynamin like GTPase proteins  
63 (MX) can effectively block early steps of multiple viral replication cycles [21]. Abnormality  
64 in the IFN-signalling cascade, for example, the absence of signal transducer and activator of  
65 transcription 1 (STAT1), will lead to the failure of activating ISGs, making the host cell highly  
66 susceptible to virus infections [22].

67

68 **Figure 1. Illustration of signalling cascade triggered by different IFNs.** In (A), type I IFN  
69 signals through IFNAR, Janus kinase 1(JAK1), tyrosine kinase 2 (TYK2), STAT, and IFN  
70 regulatory factor 9 (IRF9) to form IFN stimulated gene factor 3 complex (ISGF3), and binds  
71 to IFN stimulated response elements (ISRE) to induce the expression of type I ISGs. In (B),  
72 type II IFN signals through IFNGR, JAK1 and JAK2 to form IFN- $\gamma$  activation factor (GAF)  
73 and binds to gamma-activated sequence promoter elements (GAS) to induce the expression of

74 type II ISGs. In (C), type III IFN signals through IFNLR1, IL-10R2, JAK1, TYK2, STAT, and  
75 IRF9 to form ISGF3, and then bind to ISRE to induce the expression of type III ISGs. Figure  
76 created using the BioRender (<https://biorender.com/>).

77

78 Most research on ISGs has focused on elucidating their role in antiviral activities or  
79 discovering new ISGs within or across species [3,9,14,19,23,24]. The identification of ISGs  
80 can be achieved via various approaches. Associating gene expression with suppression of viral  
81 infection is a good strategy to identify ISGs with obvious antiviral performance, exemplified  
82 by the influenza inhibitor, MX dynamin like GTPase 1 (MX1), and the human  
83 immunodeficiency virus 1 inhibitor, MX dynamin like GTPase 2 (MX2) [21]. CRISPR  
84 screening is a loss-of-function experimental approach to identify ISGs required for IFN-  
85 mediated inhibition to viruses. It enabled the discovery of tripartite motif containing 5 (TRIM5),  
86 MX2 and bone marrow stromal cell antigen 2 (BST2) [25]. Monitoring the ectopic expression  
87 of ISGs is another instrumental way to identify ISGs that are individually sufficient for viral  
88 suppression [26], for example, interferon stimulated exonuclease gene 20 (ISG20) and ISG15  
89 ubiquitin like modifier (ISG15). Using RNA-sequencing [27] and fold change-based criterion  
90 to measure whether a target human gene is induced by IFN signalling is routinely used  
91 [24,28,29]. In most cases, a gene is defined as IFN stimulated (up-regulated) when its  
92 expression value is increased in the presence of IFNs (fold change > 2) [3,24,30].

93 There are several online databases to support IFN- or ISG-related research. For example,  
94 Interferome (<http://www.interferome.org>) provides an excellent resource by compiling *in vivo*  
95 and *in vitro* gene expression profiles in the context of IFN stimulation [24]. The Orthologous  
96 Clusters of Interferon-stimulated Genes (OCISG, <http://isg.data.cvr.ac.uk>) demonstrates an  
97 evolutionary comparative approach of genes differentially expressed in the type I IFN system  
98 for ten different species [3].

99 Experimental data in the Interferome database indicate that a human gene may show  
100 differential responses to different IFNs in different tissues or cells [24]. Despite some well-  
101 investigated ISGs, the majority of classified ISGs have limited expression following IFN  
102 stimulations [3,24]. This means that the difference between ISGs and those human genes not  
103 significantly up-regulated in the presence of IFNs (non-ISGs) may not be obvious especially  
104 when being assessed more generally. It should also be noted that, within non-ISGs, there are a  
105 group of genes down-regulated during IFN stimulations. We refer to them as interferon-  
106 repressed human genes (IRGs) and they constitute another major part of the IFN regulation  
107 system [3,31]. Collectively, the complex nature of the IFN-stimulated system results in  
108 knowledge that is far from comprehensive.

109 In this study, we try to associate the inherent properties of human genes with their  
110 expression following IFN- $\alpha$  stimulation. We show that it is feasible to make ISG predictions  
111 on human genes with a model only compiled from the knowledge of IFN- $\alpha$  responses in the  
112 human fibroblast cells. To achieve this, we first constructed a refined high-confidence dataset  
113 consisting of 620 ISGs and 874 non-ISGs by checking the genes across multiple databases  
114 including OCISG [3], Interferome [24], and Reference Sequence (RefSeq) [32]. The analyses  
115 were conducted primarily on our refined data using genome- and proteome-based features that  
116 were likely to influence the expression of human genes in the presence of IFN- $\alpha$  (**Figure 2**).  
117 Based on the calculated features, we designed a machine learning framework with an optimised  
118 feature selection strategy for the prediction of putative ISGs in different IFN systems. Finally,  
119 we also developed an online web server and Docker application to implement our machine  
120 learning method.

121

122 **Figure 2. Diagrammatic representation of the project pipeline.** Human genes used in  
123 analyses and machine learning modelling are classified based on their clinical representations

124 following IFN- $\alpha$  treatment in human fibroblast cells. ISGs (pink block) and non-ISGs (green  
125 block) in other IFN systems are only used for testing. The figure is created using images from  
126 Wikimedia Commons, <https://commons.wikimedia.org>.

127

128

## 129 **Results**

### 130 **Evolutionary characteristics of ISGs**

131 In this study, we constructed the dataset S2 from 10836 well-annotated human genes (dataset  
132 S1). It consists of 620 ISGs and 874 non-ISGs with high confidence based on their records in  
133 both the OCISG [3] and Interferome [24]. The compiled set of 10836 human genes were used  
134 as the background set and were evolutionarily unrelated to each other as they were retrieved  
135 from the OCISG [3] that compiled clusters of orthologous genes based on whole-genome  
136 alignments. Detailed information about our compiled datasets is provided in **Table 5** and  
137 **Supplementary Data S1**.

138 Here, we explored features relating to alternative splicing [33], duplication [34] and  
139 mutation [35]. We found that more highly upregulated human genes tended to have less open  
140 reading frames (ORFs) (Pearson's correlation coefficient (PCC) = -0.287, **Figure 3A**),  
141 transcripts (PCC = -0.407, **Figure 3B**), and protein-coding exons (PCC = -0.441, **Figure 3C**).  
142 These results illustrate that alternative splicing may be linked to IFN- $\alpha$  up-regulation.  
143 Particularly, the data points of IRGs are generally placed below those of non-ISGs, suggesting  
144 these three features (number of ORFs, number of transcripts and the usage of protein-coding  
145 exons) are all differentially represented in some IRGs compared to the remaining non-ISGs.  
146 This distribution also indicates that some IRGs have similar feature properties to ISGs,  
147 especially to those highly up-regulated in the presence of IFN- $\alpha$  (right part of the scatter plots  
148 in **Figure 3A, 3B & 3C**).

149

150 **Figure 3. The average representation of alternative splicing features associated with IFN-**  
151  **$\alpha$  stimulations in experiments.** (A) The numbers of ORFs and (B) transcripts are used as  
152 measurements of the diversity of alternative splicing process. (C) The counts of exons used for  
153 coding is used as a measurement of the complexity of alternative splicing process. These three  
154 plots are drawn based on the expression data of 8619 human genes with valid fold change in  
155 the IFN- $\alpha$  experiments (**Supplementary Data S1**). The 0.1-length sliding-window is adopted  
156 to divide the data into 126 bins with different  $\text{Log}_2(\text{Fold Change})$ . Vertical dashed lines  $x=-$   
157  $0.871$  and  $x=0.686$  are used to divide the plot into three regions. Data points in the left and  
158 right regions are produced by IRG and ISGs, respectively. Data points in the middle region  
159 come from ISGs or non-ISGs (including IRGs). 2217 human genes are not shown in these  
160 figures as they had insufficient read coverage to determine a fold change in the experiments  
161 (**Table 5**). Points in the scatter plot are located based on the average feature representation of  
162 genes with similar expression performance in experiments.

163

164 To determine whether the ISGs tend to originate from duplication events, we counted  
165 the number of within human paralogs of each gene (**Figure 4A**). We found that there were  
166 around 22% of singletons in our main dataset, whilst ISGs had 15% and non-ISGs had 26%.  
167 The result of a Mann-Whitney U test [36] indicated that the number of human paralogs was  
168 significantly under-represented in the ISGs compared to the background human genes ( $M_1 =$   
169  $10.5$ ,  $M_2 = 11.5$ ,  $p = 8.8\text{E-}03$ ). We hypothesize that such a difference is mainly caused by the  
170 imbalanced distribution of singletons in the ISGs and non-ISGs as it becomes smaller when  
171 singletons are excluded from the test ( $M_1 = 12.4$ ,  $M_2 = 14.6$ ,  $p > 0.05$ ). Next, we used the  
172 number of non-synonymous substitutions per non-synonymous site (dN) and synonymous  
173 substitutions per synonymous site (dS) within human paralogues as a measurement of



174 differences in mutational signatures between different classes [37]. As shown in **Figure 4B**,  
175 non-synonymous substitutions are more frequently observed in the ISGs than in the  
176 background human genes ( $M_1 = 0.62$ ,  $M_2 = 0.55$ ,  $p = 4.0E-03$ ). On the other hand, the ISGs  
177 also have a higher frequency of synonymous substitutions than the background human genes  
178 ( $M_1 = 37.7$ ,  $M_2 = 34.6$ ,  $p = 1.1E-02$ ) (**Figure 4C**) but the difference is not as obvious as for  
179 non-synonymous substitutions. In **Figure 4D**, the distribution of dN/dS ratios within human  
180 paralogues indicates that most human genes are constrained by natural selection but the ISGs,  
181 in general, tend to be less conserved ( $M_1 = 0.036$ ,  $M_2 = 0.045$ ,  $p = 8.3E-03$ ). When eliminating  
182 the influence of duplication events, the ISGs are still less conserved than the non-ISGs but the  
183 difference in the dN/dS ratio is not significant ( $M_1 = 0.053$ ,  $M_2 = 0.031$ ,  $p > 0.05$ ).

184

185 **Figure 4. Differences in the evolutionary constraints of human genes.** (A) Paralogues  
186 within *Homo sapiens*. (B) Non-synonymous substitutions within human paralogues. (C)  
187 Synonymous substitutions within human paralogues. (D) dN/dS ratios within human  
188 paralogues. Here, the ISGs and non-ISGs are taken from dataset S2 while the background  
189 human genes are from dataset S1 (**Table 5**). Mann-Whitney U tests are applied for the  
190 hypothesis testing between the feature distribution of different classes. Boxes in the plot  
191 represent the major distribution of values (from the first to the third quartile); outliers are added  
192 for values higher than two-fold of the third quartile; cross symbol marks the position of the  
193 average value including the outliers; upper and lower whiskers show the maximum and  
194 minimum values excluding the outliers.

195

### 196 **Differences in the coding region of the canonical transcripts**

197 Compared to general profile features (e.g., number of ORFs), the sequences themselves provide  
198 more direct mapping to the protein function and structure [38]. Here, we encoded 344 discrete

199 features and 7026 categorical features from complementary DNA (cDNA) of the canonical  
200 transcript to explore features specific to ISGs. We divided the discrete features into four  
201 categories and compared their representations among three different groups of human genes  
202 including recompiled ISGs from dataset S2, recompiled non-ISGs from dataset S2, and the  
203 background human genes from dataset S1 (**Figure 5**).

204 Firstly, guanine and cytosine were both more depleted in ISGs than non-ISGs, leading  
205 to an under-representation of GC-content in the ISGs (Mann-Whitney U test:  $M_1 = 52\%$ ,  $M_2 =$   
206  $55\%$ ,  $p = 2.3E-11$ ). This attribute was antithetical to the GC-biased gene conversion (gBGC),  
207 making ISGs less stable with weak evolutionary conservation (**Figure 4**) [39]. Additionally,  
208 the under-representation of GC-content also influenced the representation of other dinucleotide  
209 features. Among all dinucleotide depletions in ISGs, CpG depletion was ranked the first  
210 followed by GpG and GpC depletions ( $p = 2.9E-14$ ,  $4.9E-13$  and  $1.2E-10$ , respectively). In  
211 turn, adenine and thymine-related dinucleotide compositions, exemplified by ApT and TpA  
212 were more enriched in ISGs than non-ISGs ( $p = 8.0E-10$  and  $8.5E-10$ , respectively).

213 We compared the usage of 64 different codons in the third category as their frequencies  
214 influence transcription efficiency [40]. Differences between the ISGs and background human  
215 genes were observed in codons for 11 amino acids including leucine (L), isoleucine (I), valine  
216 (V), serine (S), threonine (T), alanine (A), glutamine (Q), lysine (K), glutamic acid (E),  
217 arginine (R), and glycine (G). The most significant difference was observed in the usage of  
218 codon 'AGA'. Among all arginine-targeted alternative codons, codon 'AGA' was usually  
219 favoured, and its usage reached an estimated 25% in the ISGs but reduced to 22% in the  
220 background human genes ( $p = 1.4E-05$ ). It was even significantly lower in the non-ISGs, at 18%  
221 ( $p = 1.9E-13$ ). On the other hand, compared to the background human genes, the codon 'CAG'  
222 coding for amino acid 'Q' was the most under-represented in the ISGs. It was less favoured by  
223 the ISGs than non-ISGs ( $M_1 = 72\%$ ,  $M_2 = 78\%$ ,  $p = 7.3E-13$ ) although it dominated in coding

224 patterns. As for the three stop codons, comparing with the background human genes, the usage  
225 of the ochre stop codon ('TAA') was over-represented in the ISGs ( $M_1 = 28\%$ ,  $M_2 = 33\%$ ,  $p =$   
226  $9.7E-03$ ). In this category of codon usage, the features with different frequencies between the  
227 ISGs and background human genes became more discriminating when comparing the ISGs  
228 with non-ISGs. Significant differences in codon usages between the ISGs and non-ISGs were  
229 widely observed except for methionine (M) and tryptophan (W). Hence, despite the limited  
230 differences of codon usages between the ISGs and background human genes, these features  
231 were useful for discriminating the ISGs from non-ISGs.

232 In the last category, we calculated the occurrence frequency of 256 nucleotide 4-mers  
233 to add some positional resolution for finding and comparing interesting organisational  
234 structures [41]. Among the 256 4-mers, 46 of them were differentially represented between the  
235 ISGs and background human genes (**Supplementary Data S2**). Most of these 4-mers were  
236 over-represented by the ISGs except two with the pattern 'TAAA' and 'CGCG'. Interestingly,  
237 the feature of 'TAAA' composition became a positive factor when comparing ISGs and non-  
238 ISGs ( $M_1 = 4.1\%$ ,  $M_2 = 3.7\%$ ,  $p = 4.1E-06$ ), suggesting it might be a good feature to discern  
239 potential or incorrectly labelled ISGs. We found six nucleotide 4-mers: 'ACCC', 'AGTC',  
240 'AGTG', 'TGCT', 'GACC', and 'GTGC' were over-represented in the ISGs when compared  
241 to the background human genes. However, they were not differentially represented when  
242 comparing the ISGs with non-ISGs. These six features might be inherently biased for some  
243 reasons and were not powerful enough to contribute to distinguishing the ISGs from non-ISGs.  
244 In addition to the aforementioned 40 features (except 4-mer 'ACCC', 'AGTC', 'AGTG',  
245 'TGCT', 'GACC', and 'GTGC') that were differentially represented in ISGs compared to  
246 background human genes, we found a further 39 features nucleotide 4-mers differentially  
247 represented between ISGs and non-ISGs (**Supplementary Data S2**).

248 To check the effect of these aforementioned 343 features on the level of stimulation in  
249 the IFN- $\alpha$  system ( $\text{Log}_2(\text{Fold Change}) > 0$ ), we calculated the PCC for the normalised features  
250 (**Equation 2**) and found 106 features were positively related to the increase of fold change, and  
251 34 features were suppressed when human gene were more up-regulated after IFN- $\alpha$  treatments  
252 (Student t-test:  $p < 0.05$ ) (**Supplementary Data S3**). ApA composition showed the most  
253 obvious positive correlation with stimulation level ( $\text{PCC} = 0.464$ ,  $p = 8.8\text{E-}06$ ) while negative  
254 association between the representation of 4-mer 'CGCG' and IFN- $\alpha$ -induced up-regulation was  
255 the most significant ( $\text{PCC} = -0.593$ ,  $p = 3.2\text{E-}09$ ). Human genes with higher up-regulation in  
256 the presence of IFN- $\alpha$  contained more codons 'CAA', rather than 'CAG' for coding amino acid  
257 'Q'. The depletion of GC-content, especially cytosine content, promotes the suppression of  
258 many nucleotide compositions in the cDNA, e.g. CpG composition.

259

260 **Figure 5. Differences in the representation of discrete features encoded from coding**  
261 **regions (canonical).** Mann-Whitney U tests are applied for hypothesis testing on the whole  
262 comparing data without sampling and the results are provided in the **Supplementary Data S2**.  
263 Here, the ISGs and non-ISGs are taken from dataset S2 (No. = 620 and 874) while the  
264 background human genes are from dataset S1 (No. = 10836) (**Table 5**).

265

266 To find conserved sequence patterns relating to gene regulations [42], we checked the  
267 existence of 2940, 44100 and 661500 short linear nucleotide patterns (SLNPs) consisting of  
268 three to five consecutive nucleobases in the group of the ISGs and non-ISGs. By using a  
269 positive 5% difference in the occurrence frequency as cut-off threshold, we found 7884 SLNPs  
270 with a maximum difference in representation around 15%. After using Pearson's chi-squared  
271 tests and Benjamini-Hochberg correction to avoid type I error in multiple hypotheses [43],  
272 7025 SLNPs remained with an adjusted p-value lower than 0.01 (**Supplementary Data S4**),

273 hereon referred to as “flagged” SLNPs. The differentially represented 7025 SLNPs were  
274 ranked according to the adjusted p-value. As shown in **Figure 6A**, dinucleotide ‘TpA’  
275 dominates in the top 10, top 100, top 1000, and all differentially represented SLNPs even if  
276 TpA representation is suppressed in the cDNA of genes’ canonical transcripts compared to  
277 other dinucleotides. Dinucleotide ‘ApT’ and ‘ApA’ are also frequently observed in the flagged  
278 SLNPs but their occurrences do not show significant difference in the top 100 SLNPs  
279 (Pearson's chi-squared test:  $p > 0.05$ ). GC-related dinucleotides, e.g., ‘CpC’, ‘GpC’ and ‘GpG’  
280 are rarely observed in the flagged SLNPs especially in the top 10 or top 100. In view of this,  
281 we hypothesize that the differential representation of nucleotide compositions influences and  
282 reflects on the pattern of SLNPs in the ISGs. By checking the co-occurrence status of the  
283 flagged SLNPs, we found that these sequence patterns had a cumulative effect in distinguishing  
284 the ISGs from non-ISGs especially when the number of cooccurring SLNPs reached around  
285 5320 (Pearson's chi-squared test:  $p = 7.9E-13$ , **Figure 6B**). There were eight (~1.3%) ISGs in  
286 the dataset S2 containing all the flagged 7025 SLNPs. Their up-regulation after IFN- $\alpha$   
287 treatment were generally low with a fold change fluctuating around 2.2. However, some of  
288 these eight genes such as desmoplakin (DSP) were clearly highly up-regulated in endothelial  
289 cells isolated from human umbilical cord veins after not only IFN- $\alpha$  treatments (fold change =  
290 11.1) but also IFN- $\beta$  treatments (fold change = 13.7). We also found some non-ISGs (e.g.,  
291 hemicentin 1 (HMCN1)) and human genes with limited expression in the IFN- $\alpha$  experiments  
292 (ELGs) (e.g. tudor domain containing 6 (TDRD6)) containing the flagged SLNPs, but their  
293 frequencies were lower than that in the ISGs. Although there is an obvious imbalance between  
294 the number of the ISGs and non-ISGs in the human genome [9-11], the curve for the  
295 background human genes in **Figure 6B** is still closer to that for the ISGs rather than that for  
296 the non-ISGs. This suggests that some genetic patterns are widely represented in the coding  
297 region of human genes, making them potentially up-regulated in the IFN- $\alpha$  system.

298

299 **Figure 6. SLNPs in the coding regions (canonical).** (A) Influence of dinucleotide  
300 compositions on the flagged SLNPs. (B) The co-occurrence status of SLNPs in different human  
301 genes. Ranks in (A) are generated based on the adjust p value given by Pearson's chi-squared  
302 tests after Benjamini-Hochberg correction procedure. Detailed results of the hypothesis tests  
303 are provided in **Supplementary Data S4**. Here, the ISGs and non-ISGs are taken from dataset  
304 S2 while the background human genes are from dataset S1 (**Table 5**).

305

### 306 **Differences in the protein amino acid sequence**

307 We used the amino acid sequences generated by the canonical transcript to extract features at  
308 the proteomic level. In addition to the basic composition of 20 standard amino acids, we  
309 considered 17 additional features related to physicochemical (e.g., hydrophathy and polarity) or  
310 geometric properties (e.g., volume) [44,45]. We found several amino acids that were either  
311 enriched or depleted in the ISG products compared to the background human proteins, which  
312 were produced by genes in dataset S1 (**Figure 7**). The differences were even more marked  
313 between protein products of the ISGs and non-ISGs, highlighting some differences that were  
314 not observed when comparing the ISG products to the background human proteins (e.g.,  
315 isoleucine composition). The differences observed in the amino acid compositions were at least  
316 in part associated with the patterns previously observed in features encoded from genetic  
317 coding regions. For example, asparagine (N) showed significant over-representation in the ISG  
318 products compared to the non-ISG products or background human proteins (Mann-Whitney U  
319 test:  $p = 2.8E-12$  and  $1.2E-03$ , respectively). This was expected as there are only two codons,  
320 i.e., 'AAT' and 'AAC' coding for amino acid 'N', and dinucleotide 'ApA' showed a  
321 remarkable enrichment in the coding region of ISGs. A similar explanation could be given for  
322 the relationship between the deficiency of GpG content and amino acid 'G'. The translation of

323 amino acid 'K' was also influenced by ApA composition but was not significant due to the  
324 mild representation of dinucleotide 'ApG' in the genetic coding region. Additionally, as  
325 previously mentioned, the ISGs showed a significant depletion in the CpG content, and  
326 consequently, the amino acid 'A' and 'R' in the ISG products were significantly under-  
327 represented. Cysteine (C) was not frequently observed in human proteins but still showed a  
328 relatively significant enrichment in the ISG products ( $M_1 = 2.3\%$ ,  $M_2 = 2.5\%$ ,  $p = 1.8E-03$ ).

329 When focusing on the composition of amino acids grouped by physicochemical or  
330 geometric properties, we found some features differentially represented between the ISG  
331 products and background human proteins. The result showed that hydroxyl (amino acid 'S' and  
332 'T'), amide (amino acid 'N' and 'Q'), or sulfur amino acids (amino acid 'C' and 'M') were  
333 more abundant in the ISG products compared to the background human proteins (Mann-  
334 Whitney U test:  $p = 0.04$ ,  $1.0E-03$  and  $0.02$ , respectively). Small amino acids (amino acid 'N',  
335 'C', 'T', aspartic acid (D) and proline (P), the volume ranges from 108.5 to 116.1 cubic  
336 angstroms) were more frequently observed in the ISG products than in background human  
337 proteins ( $M_1 = 22.1\%$ ,  $M_2 = 21.7\%$ ,  $p = 0.02$ ). These differences became more marked when  
338 comparing the representation of these features between the ISG and non-ISG products. For  
339 example, features relating to chemical properties of the side chain (e.g., aliphatic), charge status  
340 and geometric volume showed differences between proteins produced by the ISGs and non-  
341 ISGs. Some features such as neutral amino acids that include amino acid 'G', 'P', 'S', 'T',  
342 histidine (H) and tyrosine (Y) were not differentially represented between the ISG and non-  
343 ISG products, but they indicated obvious association with the change of IFN- $\alpha$ -triggered  
344 stimulations (PCC = -0.556,  $p = 4.1E-08$ ) (**Supplementary Data S3**).

345

346 **Figure 7. Differences in the representation of discrete features encoded from protein**  
347 **sequences.** Mann-Whitney U tests are applied for hypothesis testing on the whole data without



348 sampling and the results are provided in the **Supplementary Data S2**. Here, the ISGs and non-  
349 ISGs are taken from dataset S2 (No. = 620 and 874) while the background human genes are  
350 from dataset S1 (No. = 10836) (**Table 5**). Aliphatic group: amino acid 'A', 'G', 'I', 'L', 'P'  
351 and 'V'; aromatic/huge group: amino acid 'F', 'W' and 'Y' (volume > 180 cubic angstroms);  
352 sulfur group: amino acid 'C' and 'M'; hydroxyl group: amino acid 'S' and 'T';  
353 acidic/negative\_charged group: amino acid 'D' and 'E'; amide group: amino acid 'N' and 'Q';  
354 positive\_charged group: amino acid 'R', 'H' and 'K'; hydrophobic group: amino acid 'A', 'C',  
355 'I', 'L', 'M', 'F', 'V', and 'W' that participates to the hydrophobic core of the structural  
356 domains [46]; neutral group: amino acid 'G', 'H', 'P', 'S', 'T' and 'Y'; hydrophilic group:  
357 amino acid 'R', 'N', 'D', 'Q', 'E' and 'K'; Tiny group: amino acid 'G', 'A' and 'S' (volume <  
358 90 cubic angstroms); small group: amino acid 'N', 'D', 'C', 'P' and 'T' (volume ranged from  
359 109 to 116 cubic angstroms); medium group: amino acid 'Q', 'E', 'H' and 'V' (volume ranged  
360 within 138 to 153 cubic angstroms); large group: amino acid 'R', 'I', 'L', 'K' and 'M' (volume  
361 ranged within 163 to 173 cubic angstroms); uncharged group: the remaining 15 amino acids  
362 except electrically charged ones; polar group: amino acid 'R', 'H', 'K', 'D', 'E', 'N', 'Q', 'S',  
363 'T' and 'Y'; nonpolar group: the remaining 10 amino acids except polar ones.

364

365         Next, we searched the sequence of the ISG products against that of the non-ISG  
366 products to find conserved short linear amino acid patterns (SLAAPs), which might be  
367 constrained by strong purifying selection [47]. As opposed to the analysis on the genetic  
368 sequence, we only obtained 19 enriched sequence patterns with a Pearson's chi-squared p value  
369 ranging from 1.5E-04 to 0.02 (**Table 1**), hereon referred to as flagged SLAAPs. They were  
370 greatly influenced by four polar amino acids: 'K', 'N', 'E' and 'S', and one nonpolar amino  
371 acid: 'L'. Some of these flagged SLAAPs, for example, SLAAP 'NVT' and 'S-N-E', were  
372 clearly over-represented in the ISG products compared to the background human proteins and

373 could be used as features to differentiate the ISGs from background human genes. The third  
374 column in **Table 1** indicates a number of patterns that are lacking in the non-ISG products and  
375 hence may be the reason for the lack of up-regulation in the presence of IFN- $\alpha$ . Particularly,  
376 we noticed that SLAAP 'KEN' was a destruction motif that could be recognised or targeted by  
377 anaphase promoting complex (APC) for polyubiquitination and proteasome-mediated  
378 degradation [48,49]. Results shown in **Figure 8A** illustrate that the co-occurrence of  
379 differentially represented SLAAPs (flagged) has a cumulative effect in distinguishing the ISGs  
380 from non-ISGs. This cumulative effect can even be achieved with only two random SLAAPs  
381 (Pearson's chi-squared test:  $p = 4.6E-10$ ). The bias in the co-occurring SLAAPs (flagged) in  
382 the background human proteins towards a pattern similar to the non-ISG products further  
383 proves the importance of these 19 SLAAPs. However, their co-occurrence is not associated  
384 with the level of IFN-triggered stimulations (PCC = 0.015,  $p > 0.05$ ) (**Figure 8B**).

385       Regions that lacked stable structures under normal physiological conditions within  
386 proteins are termed intrinsically disordered regions (IDRs). They play an important role in cell  
387 signalling [50]. Compared with ordered regions, IDRs are usually more accessible and have  
388 multiple binding motifs, which can potentially bind to multiple partners [51]. According to the  
389 results calculated by IUPred [52], we found 6721, 10510, and 119071 IDRs (IUPred score no  
390 less than 0.5) in proteins produced by the ISGs, non-ISGs and background human genes  
391 respectively. We hypothesize that enriched SLAAPs widely detected in the IDRs may be  
392 important for human protein-protein interactions or potentially virus mimicry [53]. For instance,  
393 in the ISG products, about 40.8% of SLAAP 'SxNxT' were observed in the IDRs, 14.9% higher  
394 than that in non-ISG products (**Table 1**). This difference reflected the importance of SLAAP  
395 'SxNxT' for target specificity of IFN- $\alpha$ -induced protein-protein interactions (PPIs) [9] even if  
396 it was not statistically significant. By contrast, the conditional frequency of SLAAP 'SxNxE'  
397 in the IDRs of the ISG and non-ISG products were almost the same, indicating that SLAAP

398 ‘SxNxEx’ might have an association with some inherent attributes of the ISGs but was less likely  
399 to be involved in the IFN- $\alpha$ -induced PPIs. SLAAP ‘KEN’ in the IDRs also showed some  
400 interesting differences: in the non-ISG products, 41.9% of SLAAP ‘KEN’ were observed in  
401 the IDRs, 14.6% higher than that in the ISG products, which provided an effective approach to  
402 distinguish the ISGs from non-ISGs. When SLAAP ‘KEN’ is discovered in the ordered  
403 globular region of a protein sequence, statistically, the protein is more likely to be produced by  
404 an ISG, but this assumption is reversed if the SLAAP is located in an IDR (Pearson's chi-  
405 squared tests:  $p = 0.03$ ). Despite the relatively low conditional frequency of SLAAP ‘KEN’ in  
406 the IDRs of the ISG products, these SLAAPs in the IDR are more likely to be functionally  
407 active than those falling within ordered globular regions [54].

408

409 **Table 1. Representation of SLAAPs in protein sequences and their IDRs.**

| SLAAP <sup>a</sup> | Frequency in ISG/non-ISG products <sup>b</sup> | Bias based on the frequency in human proteins | P value <sup>c</sup> | Conditional frequency in the IDRs of ISG/non-ISG products/background human proteins <sup>c,d</sup> | P value <sup>e</sup> |
|--------------------|------------------------------------------------|-----------------------------------------------|----------------------|----------------------------------------------------------------------------------------------------|----------------------|
| SxNxEx             | 15.2%/8.8%                                     | +47.6%/-14.2%                                 | 1.5E-04              | 39.4%/40.3%/33.4%                                                                                  | 0.90                 |
| ENE                | 15.0%/8.8%                                     | +20.9%/-29.0%                                 | 2.1E-04              | 37.6%/42.9%/40.9%                                                                                  | 0.49                 |
| SxNxT              | 11.5%/6.2%                                     | +21.9%/-34.2%                                 | 2.9E-04              | 40.8%/25.9%/27.3%                                                                                  | 0.08                 |
| SVI                | 15.2%/9.2%                                     | +37.6%/-16.9%                                 | 3.6E-04              | 18.1%/11.3%/15.2%                                                                                  | 0.21                 |
| LxNL               | 23.7%/16.4%                                    | +13.2%/-21.9%                                 | 4.0E-04              | 10.2%/11.9%/9.4%                                                                                   | 0.65                 |
| LxKL               | 30.8%/22.8%                                    | +18.0%/-12.8%                                 | 4.9E-04              | 12.6%/10.1%/8.7%                                                                                   | 0.43                 |
| NVT                | 13.7%/8.5%                                     | +52.1%/-6.1%                                  | 1.2E-03              | 18.8%/21.6%/15.4%                                                                                  | 0.66                 |
| ISS                | 20.5%/14.3%                                    | +20.7%/-15.7%                                 | 1.7E-03              | 29.9%/25.6%/23.8%                                                                                  | 0.44                 |
| LKxK               | 24.4%/17.7%                                    | +24.5%/-9.3%                                  | 1.8E-03              | 14.6%/20.6%/20.0%                                                                                  | 0.16                 |
| IKxE               | 14.2%/9.0%                                     | +34.2%/-14.5%                                 | 1.8E-03              | 26.1%/16.5%/25.8%                                                                                  | 0.13                 |
| EKxI               | 15.8%/10.4%                                    | +31.0%/-13.7%                                 | 2.0E-03              | 15.3%/20.9%/16.0%                                                                                  | 0.32                 |
| KxExS              | 16.9%/11.4%                                    | +21.9%/-17.7%                                 | 2.4E-03              | 36.2%/36.0%/39.2%                                                                                  | 0.98                 |
| LNS                | 17.7%/12.1%                                    | +21.2%/-17.1%                                 | 2.4E-03              | 20.0%/25.5%/20.5%                                                                                  | 0.34                 |
| KEN                | 16.0%/10.6%                                    | +33.5%/-11.0%                                 | 2.4E-03              | 27.3%/41.9%/34.8%                                                                                  | 0.03                 |
| LxNxL              | 22.6%/17.5%                                    | +14.3%/-11.4%                                 | 1.5E-02              | 10.7%/11.8%/9.5%                                                                                   | 0.78                 |
| KxExL              | 25.8%/20.5%                                    | +25.7%/-0.3%                                  | 1.5E-02              | 18.8%/17.9%/18.7%                                                                                  | 0.84                 |
| KLL                | 27.1%/21.9%                                    | +9.9%/-11.4%                                  | 1.9E-02              | 11.3%/8.4%/9.9%                                                                                    | 0.35                 |
| LKE                | 29.8%/24.5%                                    | +18.2%/-3.0%                                  | 2.1E-02              | 19.5%/24.8%/20.1%                                                                                  | 0.20                 |
| LKxL               | 33.2%/27.7%                                    | +15.0%/-4.2%                                  | 2.1E-02              | 7.8%/12.4%/10.0%                                                                                   | 0.11                 |

410 *a: ‘x’ in SLAAPs indicates one position occupied by a standard amino acid;*

411 *b: here, the ISGs and non-ISGs are taken from dataset S2 while the background human genes use samples from*  
412 *dataset S1 (Table 5);*

413 *c: p values in this column use Pearson's chi-squared tests to measure the difference of SLAAPs occurrences in*  
414 *the ISG and non-ISG products;*

415 *d: frequencies in this column are calculated based on a condition that corresponding SLAAPs are observed in*  
416 *the protein sequence;*  
417 *e: p values in this column use Pearson's chi-squared tests to measure the difference of SLAAPs occurrences in*  
418 *the IDRs of the ISG and non-ISG products.*

419

420 **Figure 8. Representation of co-occurring SLAAPs (flagged) in our main dataset.** (A) The  
421 co-occurrence status of SLAAPs in different classes. (B) Relationship between co-occurrence  
422 of the marked SLAAPs and  $\text{Log}_2(\text{Fold Change})$  after IFN- $\alpha$  treatments. Here, the ISGs and  
423 non-ISGs are taken from dataset S2 while the background human genes are from dataset S1  
424 (**Table 5**). Points in (B) are located based on the average feature representation of genes with  
425 similar expression performance in IFN- $\alpha$  experiments.

426

### 427 **Differences in network profiles**

428 We constructed a network with 332,698 experimentally verified interactions among 17603  
429 human proteins (confidence score > 0.63) from the Human Integrated Protein-Protein  
430 Interaction rEference (HIPPIE) database [55] to investigate if the connectivity among human  
431 proteins have association with genes' expression in the IFN- $\alpha$  experiments. 10169 out of 10836  
432 human proteins produced by genes in our background dataset S1 were included in the network.  
433 Nodes and edges of this network can be downloaded from our webserver at  
434 <http://isgpre.cvr.gla.ac.uk/>. Based on this network, we calculated eight features as defined in  
435 the methods including the average shortest path, closeness, betweenness, stress, degree,  
436 neighbourhood connectivity, clustering coefficient, and topological coefficient.

437 As illustrated in **Figure 9B/G**, ISG products tend to have higher values of betweenness  
438 and stress than background human proteins (Mann-Whitney U test:  $p = 0.01$ , and  $0.03$ ,  
439 respectively), which means they are more likely to locate at key paths connecting different  
440 nodes of the PPI network. Some ISG products with high values of betweenness and stress, e.g.,

441 tripartite motif containing 25 (TRIM25), can be considered as the shortcut or bottleneck of the  
442 network and play important roles in many PPIs including those related to the IFN- $\alpha$ -triggered  
443 immune activities [56,57]. However, such differential representation of betweenness does not  
444 mean ISG products are more likely to be or even be close to bottlenecks of the network  
445 compared to the background human proteins. Some examples shown in **Table 2** indicate that  
446 ISG products are less-connected by top-ranked bottlenecks and hubs of the network than non-  
447 ISG products or the background human proteins. This conclusion is not influenced by  
448 hub/bottleneck protein's performance in the IFN- $\alpha$  experiments. Comparing proteins produced  
449 by the ISGs and non-ISGs, we found the former tends to have lower values of clustering  
450 coefficient and neighbourhood connectivity (Mann-Whitney U test:  $p = 0.04$  and  $7.9E-03$ ,  
451 **Figure 9D/F**). This discovery indicates that the ISG products and some of their interacting  
452 proteins are less likely to be targeted by lots of proteins. It also supports the finding that the  
453 ISG products are involved in many shortest paths for nodes but are away from hubs or  
454 bottlenecks in the network. To some extents, this location also increases the length of the  
455 average shortest paths through ISG products in the network (**Figure 9A**).

456 When investigating the association between IFN- $\alpha$ -induced gene stimulation and  
457 network attributes of gene products, we only found the feature of neighbourhood connectivity  
458 was under-represented as the level of differential expression in the presence of IFN increases  
459 (PCC = -0.392,  $p = 2.2E-04$ ). This suggests that proteins produced by genes that are highly up-  
460 regulated in response to IFN- $\alpha$  are further away from hubs in the PPI networks.

461

462 **Figure 9. Differences in network preferences.** The included features are: (A) average shortest  
463 path (B) betweenness, (C) closeness, (D) clustering coefficient, (E) degree, (F) neighbourhood  
464 connectivity, (G) stress, and (H) topological coefficient. Mann-Whitney U tests are applied for  
465 hypothesis testing on the whole comparing data without sampling and the results were provided

466 in the **Supplementary Data S2**. Here, the ISGs and non-ISGs are taken from dataset S2 (No.  
 467 = 620 and 874) while the background human genes use samples from dataset S1 (No. = 10836)  
 468 (**Table 5**).

469

470 **Table 2. Interaction profiles of human proteins connecting top hubs/bottlenecks of the**  
 471 **HIPPIE network.**

|                                                                                                        |                      |             |                                 |                        |
|--------------------------------------------------------------------------------------------------------|----------------------|-------------|---------------------------------|------------------------|
| Human protein                                                                                          | TRIM25               | ELAVL1      | ESR2                            | NTRK1                  |
| Gene class                                                                                             | ISG                  | IRG         | Not included in S1 <sup>a</sup> |                        |
| Degree (hub rank)                                                                                      | 2295 (2nd)           | 1787 (4th)  | 2500 (1st)                      | 1976 (3rd)             |
| Betweenness (bottleneck rank)                                                                          | 0.067 (1st)          | 0.048 (4th) | 0.051 (3rd)                     | 0.026 (5th)            |
| Difference in interacting partners<br>(ISG products versus non-ISG products) <sup>b</sup>              | Depleted<br>P = 0.01 | P > 0.05    | Depleted<br>P = 1.1E-4          | Depleted<br>P = 5.5E-3 |
| Difference in interacting partners<br>(ISG products versus the background human proteins) <sup>b</sup> | P > 0.05             | P > 0.05    | Depleted<br>P = 8.1E-3          | Depleted<br>P = 0.03   |

472 *a: ESR2 and NTRK1 were not included in dataset S1 as their expression data were not compiled in OCISG;*

473 *b: differences here are measured via Pearson's chi-squared tests on human proteins interacting with the*  
 474 *corresponding hub/bottleneck protein.*

475

## 476 **Features highly associated with the level of IFN stimulations**

477 In this study, we encoded a total of 397 discrete and 7046 categorical features covering the  
 478 aspects of evolutionary conservation, nucleotide composition, transcription, amino acid  
 479 composition, and network profiles. In order to find out some key factors that may enhance or  
 480 suppress the stimulation of human genes in the IFN- $\alpha$  system, we compared the representation  
 481 of discrete features of human genes with different but positive  $\text{Log}_2(\text{Fold Change})$ . Two  
 482 features on the co-occurrence of SLNPs and SLAAPs were not taken into consideration here  
 483 as they were more subjective than the other discrete features and were greatly influenced by  
 484 the number of sequence patterns. Upon the calculation of PCC and the result of hypothesis  
 485 tests, we found 168 features highly associated with the level of IFN- $\alpha$ -triggered stimulations  
 486 (Student t-tests:  $p < 0.05$ ) (**Supplementary Data S3**). Among them, 118 features showed a  
 487 positive correlation (**Figure 10**) while the remaining 50 features showed a negative correlation  
 488 (**Figure 11**) with the change of up-regulation in IFN- $\alpha$  experiments. Among these 168 features,

489 the number of ORFs, alternative splicing results, and counts of exons used for coding were  
490 encoded from characteristics of the gene. Average dN/dS and average dS within human  
491 paralogues were encoded based on the sequence alignment results from Ensembl [58]. 140  
492 and 22 features were encoded from the genetic sequence and proteomic sequence respectively.  
493 The last one, neighbourhood connectivity, was obtained from the network profile of a human  
494 interactome constructed based on experimentally verified data in the HIPPIE database [55].

495 In the positive group, the feature of ‘large’ amino acid compositions that includes the  
496 composition of five amino acids with geometric volume ranged from 163 to 173 cubic  
497 angstroms was ranked the first for having the highest PCC at 0.593 (Student t-test:  $p = 2.8E-$   
498 09). This feature was not highlighted previously as it did not have a strong signal for  
499 discriminating the ISGs from non-ISGs (Mann-Whitney U test:  $p > 0.05$ ). Similar phenomena  
500 were found on 87 features (64 positive correlations and 23 negative correlations) such as AG-  
501 content, ApG content and previously mentioned neutral amino acid composition. The strongest  
502 negative correlation between feature representation and IFN- $\alpha$ -triggered stimulations was  
503 found on the feature of 4-mer ‘CGCG’ (PCC = -0.593,  $p = 3.2E-09$ ). This feature also showed  
504 a differential distribution between the ISGs and non-ISGs, thus provided useful information to  
505 distinguish the ISGs from non-ISGs. Similar phenomena were found on 81 features (54 positive  
506 correlations and 27 negative correlations) such as previously mentioned GC-content, CpG  
507 content and the usage of codon ‘GCG’ coding for amino acid ‘A’.

508 Collectively, the biased effect on the basic composition of nucleotides influences the  
509 correlation between the representation of sequence-based features and IFN- $\alpha$ -triggered  
510 stimulations. Human genes that show over-representation in more features listed in **Figure 10**  
511 are expected to be more up-regulated after IFN- $\alpha$  treatments at least in the human fibroblast  
512 cells. Meanwhile, the under-representation of features listed in **Figure 11** also contributes to  
513 the level of up-regulation in the IFN- $\alpha$  experiments.



514

515 **Figure 10. 118 features positively associated with higher up-regulation after IFN- $\alpha$**   
516 **treatments.** Features here are screened based on the PCC and results of Student t-tests ( $p <$   
517  $0.05$ ). Features with higher PCC indicate stronger positive correlation. Detailed results about  
518 PCC and hypothesis tests are provided in **Supplementary Data S3**.

519

520 **Figure 11. 50 features negatively associated with higher up-regulation after IFN- $\alpha$**   
521 **treatments.** Features here are screened based on the PCC and results of Student t-tests ( $p <$   
522  $0.05$ ). Features with lower PCC indicate stronger negative correlation. Detailed results about  
523 PCC and hypothesis tests are provided in **Supplementary Data S3**.

524

525 **Difference in feature representation of interferon-repressed genes and genes with low**  
526 **levels of expression**

527 We grouped human genes into two classes based on their response to the IFN- $\alpha$  in the human  
528 fibroblast cells. Genes significantly up-regulated in IFN- $\alpha$  experiments were included in the  
529 ISG class, while those that did not were put into the non-ISG class. However, there is also  
530 another group of human genes down-regulated in the presence of IFN- $\alpha$ , i.e., the IRGs. They  
531 were labelled as the non-ISGs, but contain unique patterns that constitute an important aspect  
532 of the IFN response [3]. Some of these IRGs were not up-regulated in any known type I IFN  
533 systems, thus have been placed in a refined non-ISG class for analyses and predictions.  
534 Additionally, there are a number of genes that have insufficient levels of expression in the  
535 experiments to determine a fold change, i.e., ELGs. Here, we used the previously defined  
536 features to compare the ISGs from dataset S2 with the IRGs and ELGs divided from the  
537 background dataset S1 (**Table 5**).

538 As shown in **Figure 12**, the IRGs are differentially represented to a lower extent in the  
539 majority of nucleotide 4-mer compositions than the ISGs, indicating the deficiency of some  
540 nucleotide sequence patterns in the coding region of IRGs. Note that, many nucleotide 4-mer  
541 composition features are more suppressed in the ISGs than non-ISGs although the differences  
542 are small. The biased representation of these features in the IRGs suggests that the IRGs have  
543 characteristics similar to the ISGs rather than non-ISGs. Additionally, there are a very limited  
544 number of features relating to evolutionary conservation, nucleotide compositions or codon  
545 usages showing obvious differences between the ISGs and IRGs, but many of them are  
546 differentially represented when comparing the ISGs with non-ISGs. Therefore, involving the  
547 IRGs in the class of the non-ISGs will increase the risk for machine learning models to produce  
548 more false positives. However, there are some informative features differentiating the IRGs  
549 from ISGs. For example, compared to the ISGs, the IRGs are more enriched in CpGs (Mann-  
550 Whitney U test:  $p = 5.6E-03$ ), which is also mentioned in [59]. The IRGs tend to have higher  
551 closeness centrality and neighbourhood connectivity than the ISGs (Mann-Whitney U test:  $p =$   
552  $0.04$  and  $6.4E-06$  respectively), suggesting that the IRGs are closer to the centre of the human  
553 PPI network and connected to key proteins with many interaction partners. Differences in some  
554 amino acid composition features between the ISGs and IRGs can also be observed in **Figure**  
555 **12**. Therefore, good predictability is still expected when using features extracted from proteins  
556 sequences.

557 **Figure 12** also illustrates 161 features showing significant differences (Mann-Whitney  
558 U tests:  $p < 0.05$ ) in the representation of the ISGs and ELGs. An estimated 82% of these  
559 features were also differentially represented between the ISGs and non-ISGs. 79% of these  
560 significant features displayed similar over-representation or under-representation in two  
561 comparisons, i.e., ISGs versus ELGs and ISGs versus non-ISGs. These ratios indicate that the  
562 majority of the ELGs are less likely to be ISGs based on their feature profile as well as their

563 low expression levels in cells induced with IFN- $\alpha$ . Network analyses showed that the ELG  
564 products tended to have lower values of all calculated network features than ISG products with  
565 the exception of topological coefficient. This means that the ELG products are less connected  
566 by other human proteins in the human PPI network. Particularly, their abnormal representation  
567 on the feature of average shortest paths indicating that some ELGs (e.g. vascular cell adhesion  
568 molecule 1 (VCAM1) and ubiquitin D (UBD)) may still have high connectivity in the human  
569 PPI network.

570

571 **Figure 12. Differential expressions of discrete features between different genes and their**  
572 **coded proteins.** Mann-Whitney U tests are applied for hypothesis testing on the whole  
573 comparing data without sampling and the results were provided in the **Supplementary Data**  
574 **S2.** Here, the ISGs and non-ISGs are taken from dataset S2 (No. = 620 and 874); the IRGs and  
575 ELGs are taken from dataset S4 (No. = 1006) and dataset S8 (No. = 2217); the background  
576 human genes are from dataset S1 (No. = 10836) (**Table 5**).

577

### 578 **Implementation with machine learning framework**

579 In this study, we encoded 397 discrete and 7046 categorical features for the analyses. As an  
580 excess of features will greatly increase the dimension of feature spaces and complicate the  
581 classification task for the classifier, we limited the number of SLNPs to the top 100 based on  
582 the adjusted p-value and we expected these to be sufficient to provide a picture of short linear  
583 sequence patterns in the coding region of the canonical transcript. Accordingly, features  
584 measuring the co-occurrence status of multiple SLNPs were recalculated based on the selected  
585 100 SLNPs. As a result, we prepared 518 features (**Supplementary Data S5**) for our machine  
586 learning framework. To reduce the impact of noisy data on classifications, we only used the  
587 refined ISGs and non-ISGs from dataset S2 for training and modelling.

588 **Table 3** firstly shows the comparisons of prediction performance among different  
589 machine learning methods. The threshold is determined by maximising the value of MCC. As  
590 the random forest (RF) classifier was built based on randomly selected samples and features  
591 [60], we repeated its modelling procedure ten times. These initial comparisons showed that the  
592 support vector machine (SVM) [61] is superior to k-nearest neighbors (KNN) and RF [60]. The  
593 poor prediction performance of the best base classifier (SVM, AUC = 0.6509) indicates that  
594 there are a number of noisy features hidden in the set. As some genes respond to IFNs in a cell-  
595 specific manner [2], it is hard to produce predictions unless we detect key discriminating  
596 features, which are robust to the change of biological environment.

597 Here, we considered two iterative strategies for selecting ‘good’ features. The first one  
598 is the forward feature selection (FFS) [62] wherein features are added sequentially based on  
599 their individual performance. This strategy did not work well (**Table 3**) as the prediction  
600 performances were all poor when the feature were used individually (**Supplementary Data**  
601 **S5**). The second strategy is developed based on the backward feature elimination scheme but  
602 uses less iterations to achieve the end result, namely AUC-driven subtractive iteration  
603 algorithm (ASI) (**Figure 15**).

604 Pre-processing using the ASI algorithm showed that there were at least 28% of features  
605 disrupting the prediction model. The loss of some of the individual nucleotide 4-mer feature  
606 seemed not to influence the performance of the classifier at this stage, but the similarities  
607 between IRGs and ISGs (**Figure 12**) particularly in the 4-mer features was a cause for concern  
608 when the model was used to predict new data especially unknown IRGs.

609 When using the ASI algorithm, the number of disrupting features did not stabilise until  
610 the algorithm reached the 11-th iterations. The remaining 74 features constituted our optimum  
611 feature set for predicting the ISGs (**Table 4**). Among them, 14 and 9 features displayed positive  
612 and negative correlations with the level of up-regulation in IFN- $\alpha$  experiments ( $p < 0.05$ ).

613 During the procedure, the AUC kept increasing steadily and reached 0.7479 at the end (**Table**  
614 **3**). The Matthews correlation coefficient (MCC) also showed an overall improvement although  
615 it fluctuated slightly during the last few iterations. By degressively ranking the score calculated  
616 by the prediction model, we found 68.1% of the 496 genes (equal to the number of ISGs in the  
617 training dataset) were successfully predicted as the ISGs. **Figure 13B** illustrates the distribution  
618 of prediction scores generated by the ASI-optimised model for human genes with different  
619 expressions in IFN- $\alpha$  experiments. Human genes with higher up-regulation in IFN- $\alpha$   
620 experiments tend to obtain higher prediction score from our optimised machine learning model  
621 (PCC = 0.243,  $p = 4.2E-10$ ).

622 However, there were also some ISGs incorrectly predicted by our model even though  
623 they were highly up-regulated, for example, basic leucine zipper ATF-like transcription factor  
624 2 (BATF2, prediction score = 0.34). The model produced 33 ISGs with a prediction score  
625 higher than 0.8 but this number for the non-ISGs reduced to six, including one IRG (tripartite  
626 motif containing 59 (TRIM59)). The highest prediction score within the non-ISGs was found  
627 on ubiquitin conjugating enzyme E2 R2 (UBE2R2, prediction score = 0.88). It contains many  
628 features similar to the ISGs but was not differentially expressed in the presence of IFN- $\alpha$  in the  
629 human fibroblast cells [3]. The lowest prediction score within ISGs was found on cap  
630 methyltransferase 1 (CMTR1, prediction score = 0.12) due to the weak signal from its features.  
631 For instance, CMTR1 protein does not contain any ISG-favoured SLAAPs listed in **Table 1**.  
632 The influence of the IRGs on the prediction was reflected in the training dataset but was not  
633 significant. Compared with human genes not differentially expressed in the IFN- $\alpha$  experiments  
634 (non-ISGs but not IRGs), there were slightly more IRGs unsuccessfully classified when using  
635 a threshold of 0.549 (Pearson's chi-squared tests:  $M_1 = 27\%$ ,  $M_2 = 24\%$ ,  $p > 0.05$ ).

636

637 **Table 3. Performance of different machine learning classifiers on the training dataset S2'**  
 638 **via five-fold cross-validation.**

| Classifier | Method           | Features        | Threshold-dependent |                        |             |             |             | Threshold-independent |               |
|------------|------------------|-----------------|---------------------|------------------------|-------------|-------------|-------------|-----------------------|---------------|
|            |                  |                 | Score range         | Threshold <sup>a</sup> | Sensitivity | Specificity | MCC         | SN_496 <sup>b</sup>   | AUC           |
| Basic      | KNN <sup>c</sup> | 518             | 0.100~0.900         | 0.500~0.550            | 0.593       | 0.621       | 0.214       | 0.607±0.014           | 0.6305        |
|            | RF <sup>d</sup>  | Random          | 0.080~0.900         | 0.380~0.579            | 0.590±0.168 | 0.617±0.183 | 0.219±0.019 | 0.600±0.007           | 0.6413±0.0082 |
|            | SVM              | 518             | 0.328~0.743         | 0.542                  | 0.567       | 0.681       | 0.250       | 0.615                 | 0.6509        |
| Optimised  | SVM+FFS          | 78 <sup>e</sup> | 0.170~0.836         | 0.561                  | 0.518       | 0.760       | 0.287       | 0.621                 | 0.6768        |
|            | SVM+ASI          | 74 <sup>e</sup> | 0.098~0.918         | 0.549                  | 0.623       | 0.750       | 0.376       | 0.681                 | 0.7479        |

639 *a: this threshold is provided by maximising the value of MCC;*

640 *b: this sensitivity is measured among tested genes with the top 496 prediction probabilities;*

641 *c: k-value here is set as the square root of the size of the training samples in five-fold cross validation, i.e., k =*  
 642 *20 [63];*

643 *d: this random forest algorithm uses 50 random grown trees and the modelling and validation procedures are*  
 644 *repeated for ten times;*

645 *e: these features constitute the best/optimum feature set for the current machine learning method.*

646

647 **Figure 13. The optimisation on the machine learning model with the ASI algorithm. (A)**

648 shows the change of the prediction models based on the one generated with all 518 features

649 (noisy feature vector = 144, best MCC = 0.250, SN\_496 = 0.615, and AUC = 0.6509). (B)

650 shows the distribution of prediction scores generated by the ASI-optimised model for human

651 genes with different expression levels in the IFN- $\alpha$  system. The ISGs and non-ISGs shown in

652 (B) are randomly selected through an undersampling strategy [64] on dataset S2. The list of

653 gene names can be found in **Supplementary Data S1.**

654

655 **Table 4. The optimum 74 features contributing to predicting the ISGs.**

|                                                                               |                                   |                                   |
|-------------------------------------------------------------------------------|-----------------------------------|-----------------------------------|
| <b>Evolutionary features (2)</b>                                              |                                   |                                   |
| Number of human paralogues, average dS within human paralogues <sup>N</sup> . |                                   |                                   |
| <b>Codon usage features (10)</b>                                              |                                   |                                   |
| Codon usage: CTA (L) <sup>P</sup>                                             | Codon usage: ATT (I)              | Codon usage: TAT (Y)              |
| Codon usage: GCG (A) <sup>N</sup>                                             | Codon usage: CAC (H) <sup>N</sup> | Codon usage: TGC (C)              |
| Codon usage: CGT (R)                                                          | Codon usage: CGA (R)              | Codon usage: CGG (R) <sup>N</sup> |
| Codon usage: AGA (R) <sup>P</sup>                                             |                                   |                                   |
| <b>Genetic composition features (40)</b>                                      |                                   |                                   |

|                                         |                                         |                                         |
|-----------------------------------------|-----------------------------------------|-----------------------------------------|
| DNA AC content                          | Dinucleotide CpT composition            | DNA 4-mer CGCG composition <sup>N</sup> |
| DNA 4-mer AATC composition <sup>P</sup> | DNA 4-mer TCGT composition              | DNA 4-mer GATG composition <sup>P</sup> |
| DNA 4-mer AACA composition              | DNA 4-mer TGAG composition <sup>P</sup> | DNA 4-mer GACC composition              |
| DNA 4-mer ATAT composition              | DNA 4-mer TGTA composition              | DNA 4-mer GACG composition              |
| DNA 4-mer ATGT composition <sup>P</sup> | DNA 4-mer CACG composition              | DNA 4-mer GAGT composition <sup>P</sup> |
| DNA 4-mer ACAC composition              | DNA 4-mer CTCC composition              | DNA 4-mer GTAC composition              |
| DNA 4-mer ACTA composition              | DNA 4-mer CCAC composition              | DNA 4-mer GTGT composition              |
| DNA 4-mer ACTC composition              | DNA 4-mer CCTA composition              | DNA 4-mer GTGC composition              |
| DNA 4-mer ACCG composition              | DNA 4-mer CCTC composition <sup>P</sup> | DNA 4-mer GTGG composition              |
| DNA 4-mer TATG composition              | DNA 4-mer CCGT composition              | DNA 4-mer GCAA composition <sup>P</sup> |
| DNA 4-mer TTCT composition              | DNA 4-mer CGAG composition              | DNA 4-mer GCTC composition              |
| DNA 4-mer TTCG composition              | DNA 4-mer CGTG composition              | DNA 4-mer GCCT composition              |
| DNA 4-mer TTGA composition              | DNA 4-mer CGCA composition              | DNA 4-mer GGGG composition              |
| DNA 4-mer TCAT composition              |                                         |                                         |

---

#### Proteomic composition features (9)

Arginine composition, cysteine composition<sup>P</sup>, methionine composition;  
 Basic amino acid composition (R/H/K)<sup>P</sup> Sulfur amino acid composition (C&M)<sup>P</sup>  
 Hydroxyl amino acid composition (S&T)<sup>N</sup> Small amino acid composition (N/D/C/P/T)<sup>N</sup>  
 Large amino acid composition (R/I/L/K/M)<sup>P</sup>  
 Uncharged amino acid composition (A/N/C/Q/G/I/L/M/F/P/S/T/W/Y/V)<sup>N</sup>

---

#### Features about human interactome network (3)

Average shortest paths<sup>P</sup>, betweenness, neighborhood connectivity<sup>N</sup>.

---

#### Sequence pattern features (8)

|                   |                                        |                |
|-------------------|----------------------------------------|----------------|
| SLNP: ATA[AG][TG] | SLNP: TAT[AT]T                         | SLNP: T[AT]AAA |
| SLNP: [ATG]TGTA   | SLAAP: S <sub>x</sub> N <sub>x</sub> E | SLAAP: ENE     |
| SLAAP: SVI        | Co-occurrence of SLAAPs (count)        |                |

656 *P*: features are positively associated with the level of up-regulation in IFN- $\alpha$  experiments ( $p < 0.05$ );

657 *N*: features are negatively associated with the level of up-regulation in IFN- $\alpha$  experiments ( $p < 0.05$ ).

658

### 659 Review of different testing datasets

660 In this study, we trained and optimised a SVM model from our training dataset S2', and  
 661 prepared seven testing datasets (dataset S2''/S3/S4/S5/S6/S7/S8) to assess the generalisation  
 662 capability of our model under different conditions (**Table 5**). The S2'' testing dataset was a  
 663 subset of dataset S2. The prediction performance on this testing dataset was close to that in the  
 664 training stage with an AUC of 0.7455 (**Figure 13A**). The best MCC value (0.345) was achieved  
 665 when setting the judgement threshold to 0.438, which meant that the prediction model was  
 666 sensitive to signals related to ISGs. In this case, it performed predictions with high sensitivity  
 667 but inevitably produced many false positives, especially within IRGs.

668 In the S3 testing dataset, we used 695 ISGs with low confidence. The overall accuracy  
 669 (equals to SN as there were no negatives) only reached 44.0% when using a judgement  
 670 threshold of 0.549, about 0.18 lower than SN under the same threshold in the training dataset



671 S2' (**Table 3**). It is expected as some of their inherent attributes make them slightly up-  
672 regulated, silent or even repressed (e.g., become non-ISGs in other IFN systems) in response  
673 to some IFN-triggered signalling. On this testing dataset, our machine learning model produced  
674 38 (5.5%) ISGs with a prediction score higher than 0.8. This number was also lower than that  
675 on the training dataset S2'. It further indicates the relatively low confidence for the ISGs  
676 included in dataset S3.

677 The S4 testing dataset was constructed to illustrate our hypothesis that there are some  
678 patterns shared among the ISGs and IRGs at least in the IFN- $\alpha$  system in the human fibroblast  
679 cells. On this testing dataset, the prediction accuracy (equals to SP as there were no positives)  
680 was 60.2% under the judgement threshold of 0.549, about 0.15 lower than the SP under the  
681 same threshold in the training dataset S2' (**Table 3**). Leucine rich repeat containing 2 (LRRC2),  
682 carbohydrate sulfotransferase 10 (CHST10) and eukaryotic translation elongation factor 1  
683 epsilon 1 (EEF1E1) showed strong signals of being ISGs (probability score > 0.9). In total,  
684 there were 56 (5.6%) IRGs being incorrectly predicted as ISGs with prediction scores higher  
685 than 0.8. This high score was found in an estimated 8.1% of the ISGs but was only observed  
686 in 1.2% of human genes not differentially expressed in the IFN- $\alpha$  experiments (**Figure 13B**).  
687 These results indicate that there is a considerable number of IRGs incorrectly predicted as ISGs  
688 in the S4 testing dataset due to their close distance to the ISGs in the high-dimensional feature  
689 space. This may be the case for many other datasets including dataset S2'', S5, S6, S7, and S8.  
690 It also supports our hypothesis about the shared patterns from the machine learning aspect and  
691 is consistent with the results shown in **Figure 12**.

692 The next three testing datasets (S5, S6, and S7) were collected from the Interferome  
693 database [24] to test the applicability of the machine learning model across different IFN types.  
694 The ISGs in these testing datasets were all highly up-regulated ( $\text{Log}_2(\text{Fold Change}) > 1.0$ ) in  
695 the corresponding IFN systems while all the non-ISGs were not up-regulated after

696 corresponding IFN treatments ( $\text{Log}_2(\text{Fold Change}) < 0$ ). The results shown in **Figure 14**  
697 reveals that the ISGs triggered by type I or III IFN signalling can still be predicted by our  
698 machine learning model, but the performance is limited to some extent (AUC = 0.6677 and  
699 0.6754 respectively). However, it is almost impossible to make normal predictions with the  
700 current feature space for human genes up-regulated by type II IFNs (AUC = 0.5532).

701

702 **Figure 14. The performance of our optimised model on different datasets.** (A) and (B)  
703 illustrate the AUC and best MCC. S2' is the training dataset used in this study. It randomly  
704 includes 496 ISGs and an equal number of non-ISGs from dataset S2 that contains ISGs/non-  
705 ISGs with high confidence (**Table 5**). Evaluation on this dataset in (A) is processed via five-  
706 fold cross validation. S2'' is the testing dataset constructed with the remaining human genes in  
707 dataset S2. S5, S6, and S7 are collected from the Interferome database [24], including human  
708 genes with different responses to the type I, II and III IFNs, respectively. The label and usage  
709 of these human genes are provided in **Supplementary Data S1**.

710

711 The S8 testing dataset consisted of 2217 human genes that were insufficiently expressed  
712 in IFN- $\alpha$  experiments in the human fibroblast cells [3]. The results showed that there were  
713 around 41.2% ELGs being predicted as the ISGs when using a judgement threshold of 0.549.  
714 This was approximately 0.21 lower than the SN under the same threshold in the training dataset  
715 S2' (**Table 3**). It suggests that there are more non-ISGs than ISGs in this dataset, which is  
716 consistent with the results shown in **Figure 12**. Particularly, we found ten ELGs with prediction  
717 scores higher than 0.9: CD48 molecule, CD53 molecule, lipocalin 2 (LCN2), uncoupling  
718 protein 1 (UCP1), coiled-coil domain containing 68 (CCDC68), potassium calcium-activated  
719 channel subfamily M regulatory beta subunit 2 (KCNMB2), potassium voltage-gated channel  
720 interacting protein 4 (KCNIP4), zinc finger HIT-type containing 3 (ZNHIT3), serpin family B

721 member 4 (SERPINB4), and fibrinogen silencer binding protein (FSBP). By retrieving data  
722 from the Genotype-Tissue Expression project [65], we found that the expression of these ELGs  
723 were generally limited with the exception of CD53 and ZNHIT3 (**Figure 15**). The expression  
724 data of CD53 were not included in the OCISG database [3] and were also limited in the  
725 Interferome database [24]. It only showed slight up-regulation after type I IFN treatments in  
726 blood, liver, and brain but there is currently no record of its expression level in the presence of  
727 IFN- $\alpha$  in the human fibroblast cells. ZNHIT3 is another well-expressed gene lacking  
728 information in the OCISG. In the Interferome database [24], we found that ZNHIT3 could be  
729 up-regulated after IFN treatments in some fibroblast cells on skin. As for the remaining eight  
730 ELGs, despite their limited expression in the human fibroblast cells, their features suggest that  
731 they are very likely to be IFN- $\alpha$  stimulated in a currently untested cell type.

732

733 **Figure 15. Expression of the ELGs in different tissues.** Expression data for ten ELGs are  
734 collected from the Genotype-Tissue Expression project (<https://gtexportal.org/>) [65]. The  
735 tissues in red are not included in the Interferome database [24]. White boxes in the heatmap  
736 indicate that there is no data available for genes in the corresponding tissues. The overall  
737 expression level of these ten ELGs are reflected via human perspective photo retrieved from  
738 Expression Atlas (<https://www.ebi.ac.uk/gxa>) [66].

739

740

## 741 **Discussion**

742 In this study, we investigated the characteristics that influence the expression of human genes  
743 in IFN- $\alpha$  experiments. We compared the ISGs and non-ISGs through multiple procedures to  
744 guarantee strong signals for the ISGs and to avoid cell-specific influences that resulted in the  
745 lack of the ISGs expression in certain cell types [2]. Even some highly up-regulated ISGs can

746 become down-regulated when the biological conditions change, exemplified by the  
747 performance of C-X-C motif chemokine ligand 10 (CXCL10) on liver biopsies after IFN- $\alpha$   
748 treatment. This refinement is necessary as the representation of features between the ISGs and  
749 background human genes show that many non-ISGs especially IRGs have similar feature  
750 patterns to the ISGs (**Figure 12**).

751         Generally, the ISGs are less evolutionarily conserved with more human paralogues than  
752 the non-ISGs. They have specific nucleotide patterns exemplified by the depletion of GC-  
753 content and have a unique codon usage preference in coding proteins. There are a number of  
754 SLNPs widely observed in the cDNA of the ISGs which are relatively rare in the non-ISGs  
755 (**Supplementary Data S4**). Likewise, there are also many SLAAPs highlighted in the  
756 sequences of ISG products that are absent or rare in the non-ISG products (**Table 1**). In the  
757 human PPI network, the ISG products tend to have higher betweenness than the background  
758 human protein, indicating their more frequent interruption of the shortest path (geodesic  
759 distance) between different nodes. Abnormal expression or knockout of these proteins will  
760 increase the diameter of the network and may lead to some lethal consequences that are not  
761 tolerated in signalling pathways [67-69]. These ISG specific patterns may be the result of the  
762 evolution of the innate immune system in vertebrates and could be adaptations to the cellular  
763 environment induced by interferon following a pathogenic infection [70]. It is also possible  
764 that some of the particular SLNPs and SLAAPs may be functionally important as the cell  
765 changes from non-infected to infected. Experimental evidence will be necessary to investigate  
766 this.

767         Some inherent properties of the ISGs facilitate or elevate their expression after IFN- $\alpha$   
768 treatments but may also be used by viruses to escape from IFN- $\alpha$ -mediated antiviral response  
769 [22]. For instance, the representation of dN showed a more significant difference than that of  
770 dS within human paralogues. We found that higher dN/dS ratio was positively correlated with

771 gene up-regulation following IFN- $\alpha$  treatments (**Figure 10**). It means the gene is less conserved  
772 with more non-synonymous or nonsense mutations, which can often be associated to inherited  
773 diseases and cancer [71]. It will also facilitate the virus to interfere with IFN- $\alpha$  signalling  
774 through the JAK-STAT pathway and inactivate downstream cellular factors involved in IFN-  
775  $\alpha$  signal transductions [22]. We found arginine was under-represented in the ISG products  
776 compared to the non-ISG products. As arginine is essential for the normal proliferation and  
777 maturation of human T cells [72], such depletion in the ISG products may leave a risk of  
778 inhibiting T- cell function and potentially increased susceptibility to infections [73].  
779 Furthermore, the special pattern of the ISGs also promotes the representation of some features  
780 even if they are not well represented in nature, for example, the higher cysteine composition in  
781 the ISGs. We hypothesize that it may be helpful to activate T-cell to regulate protein synthesis,  
782 proliferation and secretion of immunoregulatory cytokines [74,75]. There are also some  
783 features (e.g. methionine composition) not differentially represented between the ISGs and  
784 non-ISGs but play important roles in IFN- $\alpha$ -mediated immune responses. For example, there  
785 is evidence for the methionine content playing a role in the biosynthesis of S-  
786 Adenosylmethionine (SAM), which can improve interferon signalling in cell culture [76,77].

787 As previously mentioned, there were similar patterns between the feature representation  
788 of the ISGs and IRGs, which led to the unclear boundary for the ISGs and non-ISGs in the  
789 feature space. We found significant differences on the representation of features on  
790 evolutionary conservation (**Figure 4**) between the ISGs and non-ISGs, but they became non-  
791 significant when comparing the ISGs with IRGs. Similar phenomena were observed on many  
792 features deciphered from the canonical transcript, e.g., dinucleotide composition and codon  
793 usage features. We suggest that the IRGs can be viewed as additional ISGs as they also regulate  
794 the activity of human genes in response to IFNs, only negatively. Furthermore, despite so many  
795 similarities between the ISGs and IRGs, the separate classification of these genes is still

796 possible. 4-mer compositions can be considered as the key features as most of them are  
797 differentially represented between ISGs and IRGs (**Figure 12**). Using proteomic features can  
798 also help to differentiate the ISGs from IRGs but is not as good as using 4-mer features.

799 In the machine learning framework, we developed the ASI algorithm to remove noisy  
800 features but kept features not influencing the prediction performance when being removed  
801 individually during iterations. Features might have synergistic effects thus the elimination of  
802 each feature left a different impact on the remaining ones even if these were individually  
803 useless for the improvement of the classifier. In this case, keeping as many useful features as  
804 possible seems to be a good option but will greatly increase the dimension of the feature space  
805 and increase the risk of overfitting [78]. By contrast, our ASI algorithm avoided such a risk  
806 and kept the synergistic effect of different features through iterations.

807 In the prediction task, we found some previously labelled non-ISGs with very high  
808 prediction scores, suggesting that they had many inherent properties enabling them to be  
809 stimulated after IFN- $\alpha$  treatments. Some of them, for example, UBE2R2 has been shown to be  
810 significantly up-regulated after IFN- $\alpha$  treatment [79]. The non-ISG label was assigned because  
811 the relevant expression data in the presence of IFN- $\alpha$  were not included in the OCISG [3] and  
812 Interferome databases [24]. We also found ten ELGs with very high prediction scores ( $> 0.9$ ).  
813 Literature searches on these genes indicate that they are likely to be involved in the innate  
814 immune response [80,81]. Their responses may be limited to certain tissues or cell types for  
815 which there is limited expression data in the Interferome database [24]. For example, LCN2  
816 has been shown to mediate an innate immune response to bacterial infections by sequestering  
817 iron [80] and is induced in the central nervous system of mice infected with West Nile virus  
818 encephalitis [82]. CD48 was shown to increase in levels in the context of human IFN- $\alpha/\beta/\gamma$   
819 stimulation [81]. Interestingly, CD48 is also the target of immune evasion by viruses [83] and  
820 has been captured in the genome of cytomegalovirus and undergone duplication [84]. Evidence

821 for other ELGs is harder to assess, particularly those for which expression is absent in a range  
822 of tissues (e.g., UCP1 in **Figure 15**). UCP1 is a mitochondrial carrier protein expressed in  
823 brown adipose tissue (BAT) responsible for non-shivering thermogenesis [85]. It is possible  
824 that UCP1 is stimulated directly or indirectly by IFN- $\alpha$  in BAT, resulting in the defended  
825 elevation of body temperature in response to infection.

826 We developed the machine learning model based on experimental data from the human  
827 fibroblast cells stimulated by IFN- $\alpha$ . It can be generalised to type I or III IFN systems,  
828 presumably because activations of type I and III ISGs are both controlled by ISRE [9] and aim  
829 to regulate host immune response [10-12]. However, our model cannot be used for predictions  
830 in the type II IFN system (AUC = 0.5532, best MCC = 0.083, **Figure 14**). It may be caused by  
831 the different control element and the different role in human immune activities [14]. One  
832 feasible strategy is to reclassify the ISGs and non-ISGs for the type II IFN system. Using  
833 overlapping ISGs and non-ISGs in both type I and type II IFN system for modelling could also  
834 be promising.

835 In summary, our analyses highlight some key sequence-based features that are helpful  
836 to distinguish the ISGs from non-ISGs or IRGs. Our machine learning model is able to produce  
837 a list of putative ISGs to support IFN-related research. As knowledge of the ISG functions  
838 continue to be elucidated by experimentalists, the *in-silico* approach applied here can in future  
839 be extended to classify the different functions of ISGs. The ‘important’ features mentioned in  
840 this study may become a focus for investigating the interferon antagonists expressed by  
841 different viruses [86].

842

843

## 844 **Methods**

### 845 **Dataset curation**

846 In this study, we retrieved 2054 ISGs (up-regulated), 12379 non-ISGs (down-regulated or not  
847 differentially expressed), and 3944 unlabelled human genes (ELGs with less than one count  
848 per million reads mapping across the three biological replicates [87,88]) from the OCISG  
849 database (<http://isg.data.cvr.ac.uk/>) [3]. Gene clusters in the OCISG database were built  
850 through Ensembl Compara [89], which provided a thorough account of gene orthology based  
851 on whole genomes available in Ensembl [58]. Labels of these human genes were defined based  
852 on the fold change and a false discovery rate (FDR) following the IFN- $\alpha$  treatments in the  
853 human fibroblast cells. We searched the collected 18377 entries against the RefSeq database  
854 (<https://www.ncbi.nlm.nih.gov/refseq/>) [32] to decipher features based on appropriate  
855 transcripts (canonical) [90] coding for the main functional isoforms of these human genes. It  
856 produced 1315, 7304, and 2217 results for the ISGs, non-ISGs and ELGs, respectively. These  
857 10836 human genes were well-annotated by multiple online databases and were used as the  
858 background dataset S1 in the analyses.

859 For the purpose of generating a set of human genes with high confidence of being up-  
860 regulated and non-up-regulated in response to the IFN- $\alpha$ , we searched the recompiled 8619  
861 human genes (ISGs or non-ISGs) against Interferome (<http://www.interferome.org/>) [24]. We  
862 filtered out the ISGs without high up-regulation ( $\text{Log}_2(\text{Fold Change}) > 1.0$ ) or with obvious  
863 down-regulation ( $\text{Log}_2(\text{Fold Change}) < -1.0$ ) in the presence of type I IFNs. This procedure  
864 guaranteed a refined ISG dataset with strong levels of stimulation induced by any type I IFNs  
865 and reduced biases driven by the IRGs for the analyses and predictions. We filtered out the  
866 non-ISGs showing enhanced expression after type I IFN treatments ( $\text{Log}_2(\text{Fold Change}) > 0$ ).  
867 The exclusion of these non-ISGs could effectively reduce the risk of involving false negatives



868 in analyses and producing false positives in predictions. As a result, the refined dataset S2  
 869 contains 620 ISGs and 874 non-ISGs with relatively high confidence.

870 The training procedure in the machine learning framework was conducted on the  
 871 balanced dataset S2'. It consisted of 992 randomly selected ISGs and non-ISGs from dataset  
 872 S2. The remaining human genes in S2 were used for independent testing. Additionally, we also  
 873 constructed another six testing datasets for the purpose of review and assessment. Dataset S3  
 874 contained 695 ISGs with low confidence compared to those ISGs in dataset S2. Some of them  
 875 could be non-ISGs or even IRGs in the type I IFN system. Dataset S4 contained 1006 IRGs  
 876 from the human fibroblast cell experiments. Dataset S5, S6, and S7 were constructed based on  
 877 records for experiments in type I, II, and III IFN systems from Interferome [24]. The criterion  
 878 for an ISG in the latter three datasets was a high level of up-regulation ( $\text{Log}_2(\text{Fold Change}) >$   
 879  $1.0$ ) while that for non-ISGs was no up-regulation after IFN treatments ( $\text{Log}_2(\text{Fold Change}) <$   
 880  $0$ ). The last testing dataset S8 was derived from our background dataset S1, containing 2217  
 881 ELGs. A breakdown of the aforementioned eight datasets is shown in **Table 5**. Detailed  
 882 information of the human genes used in this study is provided in **Supplementary Data S1**.  
 883 The cDNA and protein sequences are accessible at <http://isgpre.cvr.gla.ac.uk/>.

884

885 **Table 5. A breakdown of datasets used in this study.**

| Dataset | Brief description              | IFN system                        | ISGs | Non-ISGs | ELGs | Usage                |
|---------|--------------------------------|-----------------------------------|------|----------|------|----------------------|
| S1      | Background human genes         | IFN- $\alpha$ in fibroblast cells | 1315 | 7304     | 2217 | Analyses             |
| S2      | Dataset with high confidence   | IFN- $\alpha$ in fibroblast cells | 620  | 874      | 0    | Analyses             |
| S2'     | Training subset of S2          | IFN- $\alpha$ in fibroblast cells | 496  | 496      | 0    | Training             |
| S2''    | Testing subset of S2           | IFN- $\alpha$ in fibroblast cells | 124  | 378      | 0    | Testing              |
| S3      | ISGs with low confidence in S1 | IFN- $\alpha$ in fibroblast cells | 695  | 0        | 0    | Testing              |
| S4      | IRGs divided from S1           | IFN- $\alpha$ in fibroblast cells | 0    | 1006     | 0    | Analyses/<br>testing |
| S5      | ISGs from Interferome [24]     | Type I IFNs in all cells          | 1259 | 872      | 0    | Testing              |
| S6      | ISGs from Interferome [24]     | Type II IFN in all cells          | 2229 | 755      | 0    | Testing              |
| S7      | ISGs from Interferome [24]     | Type III IFN in all cells         | 33   | 1683     | 0    | Testing              |
| S8      | ELGs divided from S1           | IFN- $\alpha$ in fibroblast cells | 0    | 0        | 2217 | Testing              |

886

## 887 **Generation of discrete features**

888           We encoded 397 discrete features from aspects of evolution, nucleotide composition,  
889 transcription, amino acid composition, and network preference. Original values of these  
890 features for our compiled 10836 human genes are accessible at <http://isgpre.cvr.gla.ac.uk/>.

891           From the perspective of evolution, we used the number of transcripts, open reading  
892 frames (ORFs) and count of exons used for coding to quantify the alternative splicing process.  
893 Genes with more transcripts and ORFs have higher alternative splicing diversity to produce  
894 proteins with similar or different biological functions [33,91,92]. Frequent use of protein-  
895 coding exons indicates more complex alternative splicing products [93]. Here, duplication and  
896 mutation features were measured by the number of within species paralogues and substitutions  
897 [34,35]. These data were collected from BioMart [58] to assess the selection on protein  
898 sequences and mutational processes affecting the human genome [94].

899           From the perspective of nucleotide composition, we calculated the percent of adenine,  
900 thymine, cytosine, guanine, and their four-category combinations in the coding region of the  
901 canonical transcript. The first category measured the proportion of two different nitrogenous  
902 bases out of the implied four bases, e.g., GC-content. The second category also focused on the  
903 combination of two nucleotides but added the impact of phosphodiester bonds along the 5' to  
904 3' direction, e.g., CpG-content [95]. The third category calculated the occurrence frequency of  
905 4-mers, e.g., 'CGCG' composition to involve some positional resolution [41]. The last category  
906 considered the co-occurrence of SLNPs. From the perspective of transcription, we calculated  
907 the usage of 61 coding codons and three stop codons in the coding region of the canonical  
908 transcripts. Codon usage biases are observed when there are multiple codons available for  
909 coding one specific amino acid. They can affect the dynamics of translation thus regulate the  
910 efficiency of translation and even the folding of the proteins [40,96].

911 From the perspective of amino acid composition, we calculated the percentage of 20  
912 standard amino acids and their combinations based on their physicochemical properties [46].  
913 Patterns in the amino acid level are considered to have a direct impact on the establishment of  
914 biological functions or to reflect the result of strong purifying selection [47]. Based on the  
915 chemical properties of the side chain, we grouped amino acids into seven classes including  
916 aliphatic, aromatic, sulfur, hydroxyl, acidic, amide, and basic amino acids. We also grouped  
917 amino acids based on geometric volume, hydrophathy, charge status, and polarity, but found  
918 some overlaps among these features. For instance, amino acids with basic side chains are all  
919 positively charged. Aromatic amino acids all have large geometric volumes (volume > 180  
920 cubic angstroms). Likewise, we also considered the co-occurrence of short linear sequence  
921 patterns at the protein level. These co-occurring SLAAPs may relate to potential mechanisms  
922 regulating the expression of the ISGs [97].

923 When trying to measure the network preference for the gene products, we constructed  
924 a human PPI network based on 332,698 experimentally verified interactions (confidence score >  
925 0.63) from HIPPIE [55]. Nodes and edges of this network are provided at  
926 <http://isgpre.cvr.gla.ac.uk/>. Eight network-based features including the average shortest path,  
927 closeness, betweenness, stress, degree, neighbourhood connectivity, clustering coefficient, and  
928 topological coefficient were calculated from this network. Isolated nodes or proteins were not  
929 included in our network and were assigned zero value for all these eight features. The shortest  
930 path measures the average length of the shortest path between a focused node and others in the  
931 network. Closeness of a node is defined as the reciprocal of the length of the average shortest  
932 path. Proteins with a low value of the shortest paths or closeness are close to the centre of the  
933 network. Betweenness reflects the degree of control that one node exerted over the interactions  
934 of other nodes in the network [98]. Stress of a node measures the number of shortest paths  
935 passing through it. Proteins with a high value of betweenness or stress are close to the

936 bottleneck of the network. Degree of a node counts the number of edges linked to it while  
937 neighbourhood connectivity reflected the average degree of its neighbours. Proteins with high  
938 degree or neighbourhood connectivity are close to the hub of the network. They are considered  
939 to play an important role in the establishment of the stable structure of the human interactome  
940 [99]. Clustering and topological coefficient measure the possibility of a node to form clusters  
941 or topological structures with shared neighbours. The former coefficient can be used to identify  
942 the modular organisation of metabolic networks [100] while the latter one may be helpful to  
943 find out virus mimicry targets [53].

944

#### 945 **Generation of categorical features**

946 In this study, categorical features were used to check the occurrence of short linear sequence  
947 patterns in the genome and proteome. SLNPs constructed in this study contained three to five  
948 random nucleotides, producing 708,540 alternative choices. SLNPs with no restrictions on their  
949 first or last position were not taken into consideration as their patterns could be expressed in a  
950 more concise way. A SLNP was picked out to encode a binary feature when its occurrence  
951 level in the coding region of the canonical ISG transcripts was significantly higher than that  
952 for the non-ISGs (Pearson's chi-squared test:  $p < 0.05$ ). SLAAPs were constructed with three  
953 to four fixed amino acids separated by putative gaps. The gap could be occupied by at most  
954 one random amino acid, producing 1,312,000 alternative choices. Likewise, binary features  
955 were prepared for SLAAPs showing significant enrichment in the ISG products than in the  
956 non-ISG products (Pearson's chi-squared test:  $P < 0.05$ ). Since there were lots of results  
957 rejecting the null-hypothesis, we adopted the Benjamini-Hochberg correction procedure to  
958 avoid type I error [43]. Additionally, we also encoded two features to check the co-occurrence  
959 or absence of multiple SLNPs and SLAAPs. This co-occurrence status might be a better

960 representation of functional sites composed of short stretches of adjacent nucleobases or amino  
 961 acids surrounding SLNPs or SLAAPs [47].

962

### 963 **Assessment of associations between feature representation and IFN-triggered** 964 **stimulations**

965 We obtained 8619 human genes with expression data from the OCISG database [3]. 4111 of  
 966 them were annotated with a positive  $\text{Log}_2(\text{Fold Change})$  ranging from 0 to 12.6, which meant  
 967 they were up-regulated after IFN- $\alpha$  treatments in the human fibroblast cells. In order to measure  
 968 the average level of feature representation (AREP) for genes with similar expression during  
 969 IFN stimulations, we introduced a 0.1-length sliding-window to divide the data into 126 bins  
 970 with different  $\text{Log}_2(\text{Fold Change})$ . Here, PCC was introduced to test the association between  
 971 the representation of discrete features and IFN- $\alpha$ -triggered stimulation ( $\text{Log}_2(\text{Fold Change}) >$   
 972 0). It can be formulated as:

$$PCC(f) = \frac{1}{n-1} \sum_{i=1}^n \left( \frac{LFC_i - M_0}{SD_0} \right) \times \left( \frac{AREP_i - M_f}{SD_f} \right) \quad (1)$$

973 where  $n$  is the number of divided parts that equals to 126 in this study;  $LFC_i$  and  $AREP_i$  are  
 974 the value of  $\text{Log}_2(\text{Fold Change})$  and AREP in the  $i$ -th part;  $M_0$  and  $SD_0$  are the mean and  
 975 standard deviation of  $\text{Log}_2(\text{Fold Change})$ , which is set as 6.4 and 3.7 respectively in this study;  
 976  $M_f$  and  $SD_f$  are the mean and standard deviation of 126 AREP that reflect the representation  
 977 of the considered feature. To make fair comparisons among features with different scales, we  
 978 normalised them based on the major value of their representations:

$$Norm(f) = \begin{cases} 1, f > UB(f) \\ \frac{f - LB(f)}{UB(f) - LB(f)}, LB(f) < f < UB(f) \\ 0, f < LB(f) \end{cases} \quad (2)$$

979 where  $LB(f)$  and  $UB(f)$  are the lower and upper bound representing the 5th and 95th  
 980 percentile within representation values for the target feature. The representation of feature was

981 considered to have a stronger positive/negative association with IFN- $\alpha$ -triggered stimulations  
982 if the PCC calculated from the normalised features was closer to 1.0/-1.0 and the p value  
983 calculated by the Student t-test was lower than 0.05.

984

### 985 **Machine learning and optimisation**

986 We designed a machine learning framework for the prediction of ISGs. Firstly, all features  
987 were encoded and normalised based on their major representations (**Equation 2**). Then we  
988 used an under-sampling procedure [64] to generate a balanced dataset from dataset S2 for  
989 training and modelling. The SVM with radial basis function [61] was used as the basic classifier.  
990 It maps the normalised feature space to a higher dimension to generate a space plane to better  
991 classify the majority of positive and negative samples. In order to avoid overfitting [78] and  
992 made it easier for the SVM model to generate an appropriate classification plane that involved  
993 fewer false positives and false negatives, here, we propose a subtractive iteration algorithm  
994 driven by the change of AUC. This algorithm is developed based on the traditional backward  
995 feature elimination method [62] but uses fewer iterations to filter out noisy features (**Figure**  
996 **16**). In each iteration, we traversed the features and removed those that did not improve the  
997 AUC of the prediction results. In the testing procedure, we encoded the optimum features for  
998 testing samples and placed them in the optimised feature space. Samples with longer distance  
999 to the optimised classification plane indicated a stronger signal of being the ISGs or non-ISGs.  
1000 They were more likely to get higher prediction scores (close to 0 or 1) from the SVM model.

1001

1002 **Figure 16. The pseudo-code of the AUC-driven subtractive iteration algorithm.**

1003

## 1004 **Performance evaluation**

1005 In this study, the prediction results were evaluated with three threshold-dependent criteria  
1006 including sensitivity, specificity, and MCC [101] and two threshold-independent criteria: SN<sub>n</sub>  
1007 and AUC. SN and SP were used to assess the quality of the machine learning model in  
1008 recognising ISGs and non-ISGs respectively while MCC provided a comprehensive evaluation  
1009 for both positives and negatives. The number of ‘n’ in the SN<sub>n</sub> criterion was determined based  
1010 on the number of ISGs used for testing. It was used to measure the upper limit of the prediction  
1011 model as well as to check the existence of important false positives close to the class of ISGs  
1012 from the perspective of data expression. Finally, AUC was a widely used criterion to evaluate  
1013 the prediction ability of a binary classifier system. The group of interest was almost  
1014 unpredictable in a specific binary classifier system if the AUC of the classifier was close to 0.5.

1015

1016

## 1017 **Availability of source code and requirements**

- 1018 • Project name: ISGPRES
- 1019 • Project home page: <http://isgpre.cvr.gla.ac.uk/>
- 1020 • Operating system: Platform independent
- 1021 • Programming language: Java
- 1022 • Other requirements: Docker or JDK 8+
- 1023 • Docker image: <https://hub.docker.com/repository/docker/hchai01/isgpre>
- 1024 • Documentation and tutorials: <https://github.com/HChai01/ISGPRES>
- 1025 • License: GNU GPL v3.0

1026 Additionally, we have released all of our compiled data and calculated features at the  
1027 project home page and GitHub repository. They can be reused to conduct research relating to  
1028 IFN- $\alpha$  or type I/II/III IFNs.

1029

1030

## 1031 **Data Availability**

1032 The implemented web server and all reproduceable data are freely accessible at

1033 <http://isgpre.cvr.gla.ac.uk/> and <https://github.com/HChai01/ISGPRE>.

1034

1035

## 1036 **Additional Files**

1037 **Supplementary Data S1. Basic information and usage of our compiled 10836 human**  
1038 **genes.**

1039 **Supplementary Data S2. The result of Mann-Whitney U tests for discrete features.**

1040 **Supplementary Data S3. Association between feature representations and IFN- $\alpha$**   
1041 **stimulations.**

1042 **Supplementary Data S4. The result of Pearson's chi-squared tests for sequence motifs.**

1043 **Supplementary Data S5. Features and their individual performance in machine learning.**

1044

## 1045 **Abbreviations**

1046 APC: anaphase promoting complex; AREP: average level of feature representation; ASI:

1047 AUC-driven subtractive iteration algorithm; AUC: area under the receiver operating

1048 characteristic curve; BAT: brown adipose tissue; BATF2: basic leucine zipper ATF-like

1049 transcription factor 2; BST2: bone marrow stromal cell antigen 2; CCDC68: coiled-coil domain

1050 containing 68; cDNA: complementary DNA; CHST10: carbohydrate sulfotransferase 10;

1051 CMTR1: cap methyltransferase 1; CXCL10: C-X-C motif chemokine ligand 10; dN: non-

1052 synonymous substitutions per non-synonymous site; dS: synonymous substitutions per

1053 synonymous site; DSP: desmoplakin; EEF1E1: eukaryotic translation elongation factor 1



1054 epsilon 1; ELAVL1: embryonic lethal, abnormal vision like RNA binding protein 1; ELGs:  
1055 human genes with limited expression in the IFN- $\alpha$  experiments; ESR2: estrogen receptor 2;  
1056 FDR: false discovery rate; FFS: forward feature selection; FSBP: fibrinogen silencer binding  
1057 protein; GAF: IFN- $\gamma$  activation factor; GAS: gamma-activated sequence promoter elements;  
1058 gBGC: GC-biased gene conversion; HIPPIE: Human Integrated Protein-Protein Interaction  
1059 rEference; HMCN1: hemicentin 1; HPSE: ectopic expression of heparinase; IDRs: intrinsically  
1060 disordered regions; IFITM: interferon induced transmembrane proteins; IFNAR: interferon- $\alpha$   
1061 receptor; IFNGR: IFN- $\gamma$  receptor; IFNLR1: IFN- $\lambda$  receptor 1; IFNs: interferons; IL-10R2:  
1062 interleukin-10 receptor 2; IRF9: interferon regulatory factor 9; IRG: interferon repressed  
1063 (down-regulated) human genes; ISG15: ISG15 ubiquitin like modifier; ISG20: interferon  
1064 stimulated exonuclease gene 20; ISGF3: interferon stimulated gene factor 3 complex; ISGs:  
1065 interferon stimulated (up-regulated) human genes; ISRE: interferon stimulated response  
1066 elements; JAK1: Janus kinase 1; KCNIP4: potassium voltage-gated channel interacting protein  
1067 4; KCNMB2: potassium calcium-activated channel subfamily M regulatory beta subunit 2;  
1068 KNN: k-nearest neighbors; LCN2: lipocalin 2; LRRC2: Leucine rich repeat containing 2; MCC:  
1069 Matthews correlation coefficient; MX: MX dynamin like GTPase proteins; non-ISGs, human  
1070 genes not significantly up-regulated by interferons; NTRK1: neurotrophic receptor tyrosine  
1071 kinase 1; OCISG: Orthologous Clusters of Interferon-stimulated Genes; ORF: open reading  
1072 frame; PCC: Pearson's correlation coefficient; PPI: protein-protein interaction; RefSeq:  
1073 Reference Sequence; RF: random forest; SAM: S-Adenosylmethionine; SERPINB4: serpin  
1074 family B member 4; SLAAP: short linear amino acid pattern; SLNP: short linear nucleotide  
1075 pattern; SN: sensitivity; SP: specificity; STAT: signal transducer and activator of transcription;  
1076 SVM: support vector machine; TDRD6: tudor domain containing 6; TRIM25: tripartite motif  
1077 containing 25; TRIM5: tripartite motif containing 5; TRIM59: tripartite motif containing 59;  
1078 TYK2: tyrosine kinase 2; UBD: ubiquitin D; UBE2R2: ubiquitin conjugating enzyme E2 R2;

1079 UCP1: uncoupling protein 1; VCAM1: vascular cell adhesion molecule 1; ZNHIT3: zinc finger  
1080 HIT-type containing 3.

1081

1082

### 1083 **Competing Interests**

1084 The authors have declared that no competing interests exist.

1085

1086

### 1087 **Funding**

1088 HC is supported by the China Scholarship Council (201706620069). JH, QG and DLR are  
1089 supported by the Medical Research Council (MC\_UU\_1201412). The funders had no role in  
1090 study design, data collection and analysis, decision to publish, or preparation of the manuscript.

1091

1092

### 1093 **Authors' Contributions**

1094 Conceptualization: all authors; data curation: H. C.; formal analysis: H. C.; funding acquisition:  
1095 D. L. R.; investigation: H. C.; methodology: H. C.; project administration: D. L. R., J. H.;  
1096 resources: Q. G., J. H., D. L. R.; web server: H. C.; software: H. C.; supervision: Q. G., J. H.,  
1097 D. L. R.; validation: all authors; visualization: H. C.; writing original draft: H. C.; writing  
1098 review & editing: all authors.

1099

1100

### 1101 **Acknowledgments**

1102 The authors wish to thank Drs Andrew Davison, Suzannah Rihn and Sam Wilson for helpful  
1103 discussions and recommendations, and Scott Arkison for help setting up the website.

1104

1105

1106 **References**

- 1107 1. Rönnblom L. The type I interferon system in the etiopathogenesis of autoimmune  
1108 diseases. *Ups J Med Sci.* 2011;116(4):227-37.
- 1109 2. Mostafavi S, Yoshida H, Moodley D, LeBoité H, Rothamel K, Raj T, et al. Parsing the  
1110 interferon transcriptional network and its disease associations. *Cell.* 2016;164(3):564-  
1111 78.
- 1112 3. Shaw AE, Hughes J, Gu Q, Behdenna A, Singer JB, Dennis T, et al. Fundamental  
1113 properties of the mammalian innate immune system revealed by multispecies  
1114 comparison of type I interferon responses. *PLoS Biol.* 2017;15(12):e2004086.
- 1115 4. Shalhoub S. Interferon beta-1b for COVID-19. *The Lancet.* 2020;395(10238):1670-1.
- 1116 5. Harris BD, Schreiter J, Chevrier M, Jordan JL and Walter MR. Human interferon- $\epsilon$  and  
1117 interferon- $\kappa$  exhibit low potency and low affinity for cell-surface IFNAR and the  
1118 poxvirus antagonist B18R. *J Biol Chem.* 2018;293(41):16057-68.
- 1119 6. Li S-f, Zhao F-r, Shao J-j, Xie Y-l, Chang H-y and Zhang Y-g. Interferon-omega:  
1120 Current status in clinical applications. *Int Immunopharmacol.* 2017;52):253-60.
- 1121 7. Kak G, Raza M and Tiwari BK. Interferon-gamma (IFN- $\gamma$ ): exploring its implications  
1122 in infectious diseases. *Biomol Concepts.* 2018;9(1):64-79.
- 1123 8. Hemann EA, Gale Jr M and Savan R. Interferon lambda genetics and biology in  
1124 regulation of viral control. *Front Immunol.* 2017;8):1707.
- 1125 9. Schneider WM, Chevillotte MD and Rice CM. Interferon-stimulated genes: a complex  
1126 web of host defenses. *Annu Rev Immunol.* 2014;32):513-45.
- 1127 10. Kotenko SV and Durbin JE. Contribution of type III interferons to antiviral immunity:  
1128 location, location, location. *J Biol Chem.* 2017;292(18):7295-303.
- 1129 11. Fensterl V and Sen GC. Interferons and viral infections. *Biofactors.* 2009;35(1):14-20.
- 1130 12. Lazear HM, Schoggins JW and Diamond MS. Shared and distinct functions of type I  
1131 and type III interferons. *Immunity.* 2019;50(4):907-23.
- 1132 13. Takaoka A and Yanai H. Interferon signalling network in innate defence. *Cell*  
1133 *Microbiol.* 2006;8(6):907-22.
- 1134 14. Stark GR and Darnell Jr JE. The JAK-STAT pathway at twenty. *Immunity.*  
1135 2012;36(4):503-14.
- 1136 15. Schoggins JW. Interferon-stimulated genes: what do they all do? *Annu Rev Virol.*  
1137 2019;6):567-84.
- 1138 16. Aso H, Ito J, Koyanagi Y and Sato K. Comparative description of the expression profile  
1139 of interferon-stimulated genes in multiple cell lineages targeted by HIV-1 infection.  
1140 *Front Microbiol.* 2019;10):429.
- 1141 17. Dang W, Xu L, Yin Y, Chen S, Wang W, Hakim MS, et al. IRF-1, RIG-I and MDA5  
1142 display potent antiviral activities against norovirus coordinately induced by different  
1143 types of interferons. *Antiviral Res.* 2018;155):48-59.
- 1144 18. Masola V, Bellin G, Gambaro G and Onisto M. Heparanase: A multitasking protein  
1145 involved in extracellular matrix (ECM) remodeling and intracellular events. *Cells.*  
1146 2018;7(12):236.
- 1147 19. Schoggins JW. Recent advances in antiviral interferon-stimulated gene biology.  
1148 *F1000Research.* 2018;7

- 1149 20. Spence JS, He R, Hoffmann H-H, Das T, Thinon E, Rice CM, et al. IFITM3 directly  
1150 engages and shuttles incoming virus particles to lysosomes. *Nat Chem Biol.*  
1151 2019;15(3):259-68.
- 1152 21. Haller O, Staeheli P, Schwemmler M and Kochs G. Mx GTPases: dynamin-like antiviral  
1153 machines of innate immunity. *Trends Microbiol.* 2015;23(3):154-63.
- 1154 22. García-Sastre A. Ten strategies of interferon evasion by viruses. *Cell Host Microbe.*  
1155 2017;22(2):176-84.
- 1156 23. Giotis ES, Robey RC, Skinner NG, Tomlinson CD, Goodbourn S and Skinner MA.  
1157 Chicken interferome: avian interferon-stimulated genes identified by microarray and  
1158 RNA-seq of primary chick embryo fibroblasts treated with a chicken type I interferon  
1159 (IFN- $\alpha$ ). *Vet Res.* 2016;47(1):1-12.
- 1160 24. Rusinova I, Forster S, Yu S, Kannan A, Masse M, Cumming H, et al. Interferome v2.  
1161 0: an updated database of annotated interferon-regulated genes. *Nucleic Acids Res.*  
1162 2012;41(D1):D1040-D6.
- 1163 25. OhAinle M, Helms L, Vermeire J, Roesch F, Humes D, Basom R, et al. A virus-  
1164 packageable CRISPR screen identifies host factors mediating interferon inhibition of  
1165 HIV. *Elife.* 2018;7):e39823.
- 1166 26. Zhang Y, Burke CW, Ryman KD and Klimstra WB. Identification and characterization  
1167 of interferon-induced proteins that inhibit alphavirus replication. *J Virol.*  
1168 2007;81(20):11246-55.
- 1169 27. Stark R, Grzelak M and Hadfield J. RNA sequencing: the teenage years. *Nature*  
1170 *Reviews Genetics.* 2019;20(11):631-56.
- 1171 28. Pamela C, Kanchwala M, Liang H, Kumar A, Wang L-F, Xing C, et al. The IFN  
1172 response in bats displays distinctive IFN-stimulated gene expression kinetics with  
1173 atypical RNASEL induction. *The Journal of Immunology.* 2018;200(1):209-17.
- 1174 29. Feld JJ, Nanda S, Huang Y, Chen W, Cam M, Pusek SN, et al. Hepatic gene expression  
1175 during treatment with peginterferon and ribavirin: Identifying molecular pathways for  
1176 treatment response. *Hepatology.* 2007;46(5):1548-63.
- 1177 30. Dalman MR, Deeter A, Nimishakavi G and Duan Z-H. Fold change and p-value cutoffs  
1178 significantly alter microarray interpretations. In: *BMC Bioinformatics* 2012, pp.1-4.  
1179 BioMed Central.
- 1180 31. Trilling M, Bellora N, Rutkowski AJ, de Graaf M, Dickinson P, Robertson K, et al.  
1181 Deciphering the modulation of gene expression by type I and II interferons combining  
1182 4sU-tagging, translational arrest and in silico promoter analysis. *Nucleic Acids Res.*  
1183 2013;41(17):8107-25.
- 1184 32. O'Leary NA, Wright MW, Brister JR, Ciuffo S, Haddad D, McVeigh R, et al. Reference  
1185 sequence (RefSeq) database at NCBI: current status, taxonomic expansion, and  
1186 functional annotation. *Nucleic Acids Res.* 2016;44(D1):D733-D45.
- 1187 33. Bragg JG, Potter S, Bi K and Moritz C. Exon capture phylogenomics: efficacy across  
1188 scales of divergence. *Mol Ecol Resour.* 2016;16(5):1059-68.
- 1189 34. Kondrashov FA, Rogozin IB, Wolf YI and Koonin EV. Selection in the evolution of  
1190 gene duplications. *Genome Biol.* 2002;3(2):1-9.
- 1191 35. Esposito M and Moreno-Hagelsieb G. Non-synonymous to synonymous substitutions  
1192 suggest that orthologs tend to keep their functions, while paralogs are a source of  
1193 functional novelty. *bioRxiv.* (2018):354704.
- 1194 36. MacFarland TW and Yates JM. Mann–whitney u test. *Introduction to nonparametric*  
1195 *statistics for the biological sciences using R.* Springer; 2016. p. 103-32.
- 1196 37. Van den Eynden J and Larsson E. Mutational signatures are critical for proper  
1197 estimation of purifying selection pressures in cancer somatic mutation data when using  
1198 the dN/dS metric. *Front Genet.* 2017;8):74.

- 1199 38. Song H, Bremer BJ, Hinds EC, Raskutti G and Romero PA. Inferring protein sequence-  
1200 function relationships with large-scale positive-unlabeled learning. *Cell Syst.* 2020;
- 1201 39. Pessia E, Popa A, Mousset S, Rezvoy C, Duret L and Marais GA. Evidence for  
1202 widespread GC-biased gene conversion in eukaryotes. *Genome Biol Evol.*  
1203 2012;4(7):675-82.
- 1204 40. Zhou Z, Dang Y, Zhou M, Li L, Yu C-h, Fu J, et al. Codon usage is an important  
1205 determinant of gene expression levels largely through its effects on transcription.  
1206 *Proceedings of the National Academy of Sciences.* 2016;113(41):E6117-E25.
- 1207 41. Sievers A, Bosiek K, Bisch M, Dreessen C, Riedel J, Froß P, et al. K-mer content,  
1208 correlation, and position analysis of genome DNA sequences for the identification of  
1209 function and evolutionary features. *Genes.* 2017;8(4):122.
- 1210 42. Lee NK, Li X and Wang D. A comprehensive survey on genetic algorithms for DNA  
1211 motif prediction. *Inf Sci.* 2018;466):25-43.
- 1212 43. Noble WS. How does multiple testing correction work? *Nat Biotechnol.*  
1213 2009;27(12):1135-7.
- 1214 44. Di Rienzo L, Miotto M, Bò L, Ruocco G, Raimondo D and Milanetti E. Characterizing  
1215 hydropathy of amino acid side chain in a protein environment by investigating the  
1216 structural changes of water molecules network. *Front Mol Biosci.* 2021;8
- 1217 45. Bhadra P, Yan J, Li J, Fong S and Siu SW. AmPEP: Sequence-based prediction of  
1218 antimicrobial peptides using distribution patterns of amino acid properties and random  
1219 forest. *Sci Rep.* 2018;8(1):1-10.
- 1220 46. Pommié C, Levadoux S, Sabatier R, Lefranc G and Lefranc MP. IMGT standardized  
1221 criteria for statistical analysis of immunoglobulin V- REGION amino acid properties.  
1222 *J Mol Recognit.* 2004;17(1):17-32.
- 1223 47. Kumar M, Gouw M, Michael S, Sámano-Sánchez H, Pancsa R, Glavina J, et al. ELM—  
1224 the eukaryotic linear motif resource in 2020. *Nucleic Acids Res.* 2020;48(D1):D296-  
1225 D306.
- 1226 48. Pflieger CM and Kirschner MW. The KEN box: an APC recognition signal distinct from  
1227 the D box targeted by Cdh1. *Genes Dev.* 2000;14(6):655-65.
- 1228 49. Fehr AR and Yu D. Control the host cell cycle: viral regulation of the anaphase-  
1229 promoting complex. *J Virol.* 2013;87(16):8818-25.
- 1230 50. Bösl K, Ianevski A, Than TT, Andersen PI, Kuivanen S, Teppor M, et al. Common  
1231 nodes of virus–host interaction revealed through an integrated network analysis. *Front*  
1232 *Immunol.* 2019;10):2186.
- 1233 51. Wright PE and Dyson HJ. Intrinsically disordered proteins in cellular signalling and  
1234 regulation. *Nat Rev Mol Cell Biol.* 2015;16(1):18-29.
- 1235 52. Mészáros B, Erdős G and Dosztányi Z. IUPred2A: context-dependent prediction of  
1236 protein disorder as a function of redox state and protein binding. *Nucleic Acids Res.*  
1237 2018;46(W1):W329-W37.
- 1238 53. Hagai T, Azia A, Babu MM and Andino R. Use of host-like peptide motifs in viral  
1239 proteins is a prevalent strategy in host-virus interactions. *Cell Rep.* 2014;7(5):1729-39.
- 1240 54. Michael S, Travé G, Ramu C, Chica C and Gibson TJ. Discovery of candidate KEN-  
1241 box motifs using cell cycle keyword enrichment combined with native disorder  
1242 prediction and motif conservation. *Bioinformatics.* 2008;24(4):453-7.
- 1243 55. Alanis-Lobato G, Andrade-Navarro MA and Schaefer MH. HIPPIE v2.0: enhancing  
1244 meaningfulness and reliability of protein–protein interaction networks. *Nucleic Acids*  
1245 *Res.* 2016):gkw985.
- 1246 56. Abedi M and Gheisari Y. Nodes with high centrality in protein interaction networks are  
1247 responsible for driving signaling pathways in diabetic nephropathy. *PeerJ.*  
1248 2015;3):e1284.

- 1249 57. Ozato K, Shin D-M, Chang T-H and Morse HC. TRIM family proteins and their  
1250 emerging roles in innate immunity. *Nat Rev Immunol.* 2008;8(11):849-60.
- 1251 58. Yates AD, Achuthan P, Akanni W, Allen J, Allen J, Alvarez-Jarreta J, et al. Ensembl  
1252 2020. *Nucleic Acids Res.* 2020;48(D1):D682-D8.
- 1253 59. Shaw AE, Rihn SJ, Mollentze N, Wickenhagen A, Stewart DG, Orton RJ, et al. The  
1254 antiviral state has shaped the CpG composition of the vertebrate interferome to avoid  
1255 self-targeting. *PLoS Biol.* 2021;19(9):e3001352.
- 1256 60. Zhang M-L and Zhou Z-H. ML-KNN: A lazy learning approach to multi-label learning.  
1257 *Pattern recognition.* 2007;40(7):2038-48.
- 1258 61. Chang C-C and Lin C-J. LIBSVM: A library for support vector machines. *ACM Trans*  
1259 *Intell Syst Technol.* 2011;2(3):1-27.
- 1260 62. Sivaranjani S, Ananya S, Aravinth J and Karthika R. Diabetes prediction using machine  
1261 learning algorithms with feature selection and dimensionality reduction. In: *2021 7th*  
1262 *International Conference on Advanced Computing and Communication Systems*  
1263 *(ICACCS) 2021*, pp.141-6. IEEE.
- 1264 63. Cheng D, Zhang S, Deng Z, Zhu Y and Zong M. kNN algorithm with data-driven k  
1265 value. In: *International Conference on Advanced Data Mining and Applications 2014*,  
1266 pp.499-512. Springer.
- 1267 64. Liu X-Y, Wu J and Zhou Z-H. Exploratory undersampling for class-imbalance learning.  
1268 *IEEE Trans Syst Man Cybern.* 2008;39(2):539-50.
- 1269 65. Lonsdale J, Thomas J, Salvatore M, Phillips R, Lo E, Shad S, et al. The genotype-tissue  
1270 expression (GTEx) project. *Nat Genet.* 2013;45(6):580-5.
- 1271 66. Papatheodorou I, Moreno P, Manning J, Fuentes AM-P, George N, Fexova S, et al.  
1272 Expression Atlas update: from tissues to single cells. *Nucleic Acids Res.*  
1273 2020;48(D1):D77-D83.
- 1274 67. Jeong H, Mason SP, Barabási A-L and Oltvai ZN. Lethality and centrality in protein  
1275 networks. *Nature.* 2001;411(6833):41-2.
- 1276 68. Hahn MW and Kern AD. Comparative genomics of centrality and essentiality in three  
1277 eukaryotic protein-interaction networks. *Mol Biol Evol.* 2005;22(4):803-6.
- 1278 69. Batada NN, Hurst LD and Tyers M. Evolutionary and physiological importance of hub  
1279 proteins. *PLoS Comput Biol.* 2006;2(7):e88.
- 1280 70. Pérez-Martínez D. Innate immunity in vertebrates: an overview. *Immunology.*  
1281 2016;148(2):125-39.
- 1282 71. Jopling CL. Mutations: Stop that nonsense! *Elife.* 2014;3):e04300.
- 1283 72. Zhu X, Pribis JP, Rodriguez PC, Morris Jr SM, Vodovotz Y, Billiar TR, et al. The  
1284 central role of arginine catabolism in T-cell dysfunction and increased susceptibility to  
1285 infection after physical injury. *Ann Surg.* 2014;259(1):171-8.
- 1286 73. Morris CR, Hamilton- Reeves J, Martindale RG, Sarav M and Ochoa Gautier JB.  
1287 Acquired amino acid deficiencies: a focus on arginine and glutamine. *Nutr Clin Pract.*  
1288 2017;32):30S-47S.
- 1289 74. Levring TB, Hansen AK, Nielsen BL, Kongsbak M, Von Essen MR, Woetmann A, et  
1290 al. Activated human CD4+ T cells express transporters for both cysteine and cystine.  
1291 *Sci Rep.* 2012;2(1):1-6.
- 1292 75. Sikalidis AK. Amino acids and immune response: a role for cysteine, glutamine,  
1293 phenylalanine, tryptophan and arginine in T-cell function and cancer? *Pathol Oncol Res.*  
1294 2015;21(1):9-17.
- 1295 76. Yin C, Zheng T and Chang X. Biosynthesis of S-Adenosylmethionine by magnetically  
1296 immobilized *Escherichia coli* cells highly expressing a methionine adenosyltransferase  
1297 variant. *Molecules.* 2017;22(8):1365.

- 1298 77. Feld JJ, Modi AA, El-Diwany R, Rotman Y, Thomas E, Ahlenstiel G, et al. S-adenosyl  
1299 methionine improves early viral responses and interferon-stimulated gene induction in  
1300 hepatitis C nonresponders. *Gastroenterology*. 2011;140(3):830-9.
- 1301 78. Yeom S, Giacomelli I, Fredrikson M and Jha S. Privacy risk in machine learning:  
1302 Analyzing the connection to overfitting. In: *2018 IEEE 31st Computer Security*  
1303 *Foundations Symposium (CSF) 2018*, pp.268-82. IEEE.
- 1304 79. Li S-W, Lai C-C, Ping J-F, Tsai F-J, Wan L, Lin Y-J, et al. Severe acute respiratory  
1305 syndrome coronavirus papain-like protease suppressed alpha interferon-induced  
1306 responses through downregulation of extracellular signal-regulated kinase 1-mediated  
1307 signalling pathways. *J Gen Virol*. 2011;92(5):1127-40.
- 1308 80. Flo TH, Smith KD, Sato S, Rodriguez DJ, Holmes MA, Strong RK, et al. Lipocalin 2  
1309 mediates an innate immune response to bacterial infection by sequestering iron. *Nature*.  
1310 2004;432(7019):917-21.
- 1311 81. Tissot C, Rebouissou C, Klein B and Mechti N. Both human  $\alpha/\beta$  and  $\gamma$  interferons  
1312 upregulate the expression of CD48 cell surface molecules. *J Interferon Cytokine Res*.  
1313 1997;17(1):17-26.
- 1314 82. Noçon AL, Ip JP, Terry R, Lim SL, Getts DR, Müller M, et al. The bacteriostatic protein  
1315 lipocalin 2 is induced in the central nervous system of mice with West Nile virus  
1316 encephalitis. *J Virol*. 2014;88(1):679-89.
- 1317 83. Zarama A, Perez-Carmona N, Farre D, Tomic A, Borst EM, Messerle M, et al.  
1318 Cytomegalovirus m154 hinders CD48 cell-surface expression and promotes viral  
1319 escape from host natural killer cell control. *PLoS Pathog*. 2014;10(3):e1004000.
- 1320 84. Martínez-Vicente P, Farré D, Engel P and Angulo A. Divergent Traits and Ligand-  
1321 Binding Properties of the Cytomegalovirus CD48 Gene Family. *Viruses*.  
1322 2020;12(8):813.
- 1323 85. Ricquier D. UCP1, the mitochondrial uncoupling protein of brown adipocyte: a  
1324 personal contribution and a historical perspective. *Biochimie*. 2017;134):3-8.
- 1325 86. Hossain MA, Larrous F, Rawlinson SM, Zhan J, Sethi A, Ibrahim Y, et al. Structural  
1326 elucidation of viral antagonism of innate immunity at the STAT1 interface. *Cell Rep*.  
1327 2019;29(7):1934-45. e8.
- 1328 87. Yu X, Liu H, Hamel KA, Morvan MG, Yu S, Leff J, et al. Dorsal root ganglion  
1329 macrophages contribute to both the initiation and persistence of neuropathic pain. *Nat*  
1330 *Commun*. 2020;11(1):1-12.
- 1331 88. Chen Y, Lun AT and Smyth GK. From reads to genes to pathways: differential  
1332 expression analysis of RNA-Seq experiments using Rsubread and the edgeR quasi-  
1333 likelihood pipeline. *F1000Research*. 2016;5
- 1334 89. Herrero J, Muffato M, Beal K, Fitzgerald S, Gordon L, Pignatelli M, et al. Ensembl  
1335 comparative genomics resources. *Database*. 2016;2016):bav096.
- 1336 90. Li HD, Menon R, Omenn GS and Guan Y. Revisiting the identification of canonical  
1337 splice isoforms through integration of functional genomics and proteomics evidence.  
1338 *Proteomics*. 2014;14(23-24):2709-18.
- 1339 91. Wang ET, Sandberg R, Luo S, Khrebtkova I, Zhang L, Mayr C, et al. Alternative  
1340 isoform regulation in human tissue transcriptomes. *Nature*. 2008;456(7221):470-6.
- 1341 92. Sieber P, Platzer M and Schuster S. The definition of open reading frame revisited.  
1342 *Trends Genet*. 2018;34(3):167-70.
- 1343 93. Pan Q, Shai O, Lee LJ, Frey BJ and Blencowe BJ. Deep surveying of alternative  
1344 splicing complexity in the human transcriptome by high-throughput sequencing. *Nat*  
1345 *Genet*. 2008;40(12):1413-5.

1346 94. Guéguen L and Duret L. Unbiased estimate of synonymous and nonsynonymous  
1347 substitution rates with nonstationary base composition. *Mol Biol Evol.* 2018;35(3):734-  
1348 42.

1349 95. Takata MA, Gonçalves-Carneiro D, Zang TM, Soll SJ, York A, Blanco-Melo D, et al.  
1350 CG dinucleotide suppression enables antiviral defence targeting non-self RNA. *Nature.*  
1351 2017;550(7674):124-7.

1352 96. Yu C-H, Dang Y, Zhou Z, Wu C, Zhao F, Sachs MS, et al. Codon usage influences the  
1353 local rate of translation elongation to regulate co-translational protein folding. *Mol Cell.*  
1354 2015;59(5):744-54.

1355 97. Tufarelli C, Ahmad A, Strohbuecker S, Scotti C and Sottile V. In Silico Identification  
1356 of SOX1 Post-Translational Modifications Highlights a Shared Protein Motif. 2020;

1357 98. Yoon J, Blumer A and Lee K. An algorithm for modularity analysis of directed and  
1358 weighted biological networks based on edge-betweenness centrality. *Bioinformatics.*  
1359 2006;22(24):3106-8.

1360 99. Friedel CC and Zimmer R. Influence of degree correlations on network structure and  
1361 stability in protein-protein interaction networks. *BMC Bioinformatics.* 2007;8(1):1-10.

1362 100. Ravasz E, Somera AL, Mongru DA, Oltvai ZN and Barabási A-L. Hierarchical  
1363 organization of modularity in metabolic networks. *Science.* 2002;297(5586):1551-5.

1364 101. Chicco D and Jurman G. The advantages of the Matthews correlation coefficient (MCC)  
1365 over F1 score and accuracy in binary classification evaluation. *BMC Genomics.*  
1366 2020;21(1):1-13.

1367



Figure 1

[Click here to access/download;Figure;Figure\\_1.eps](#)

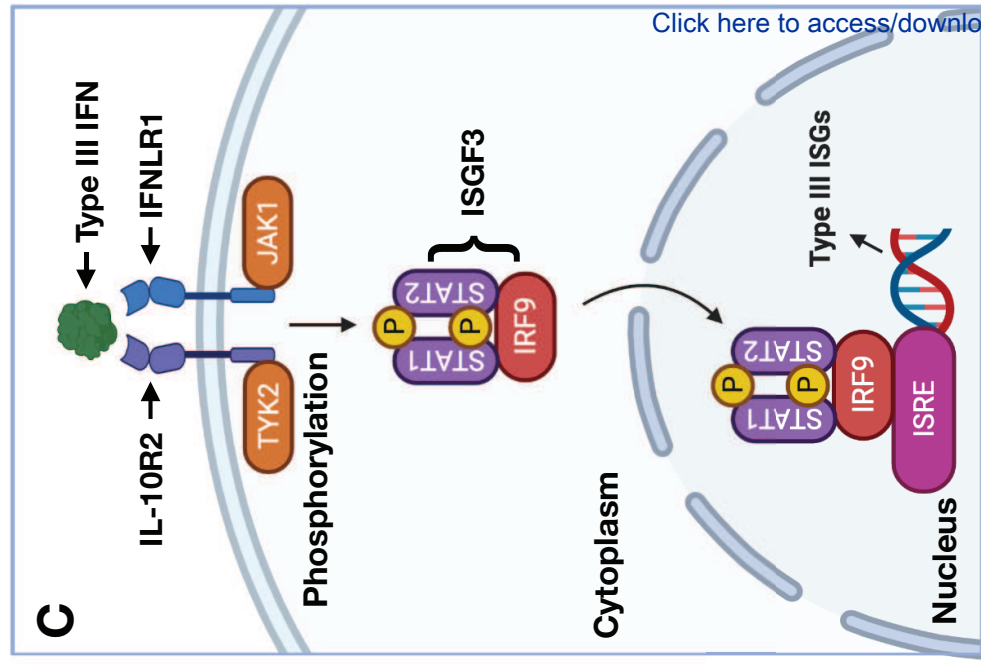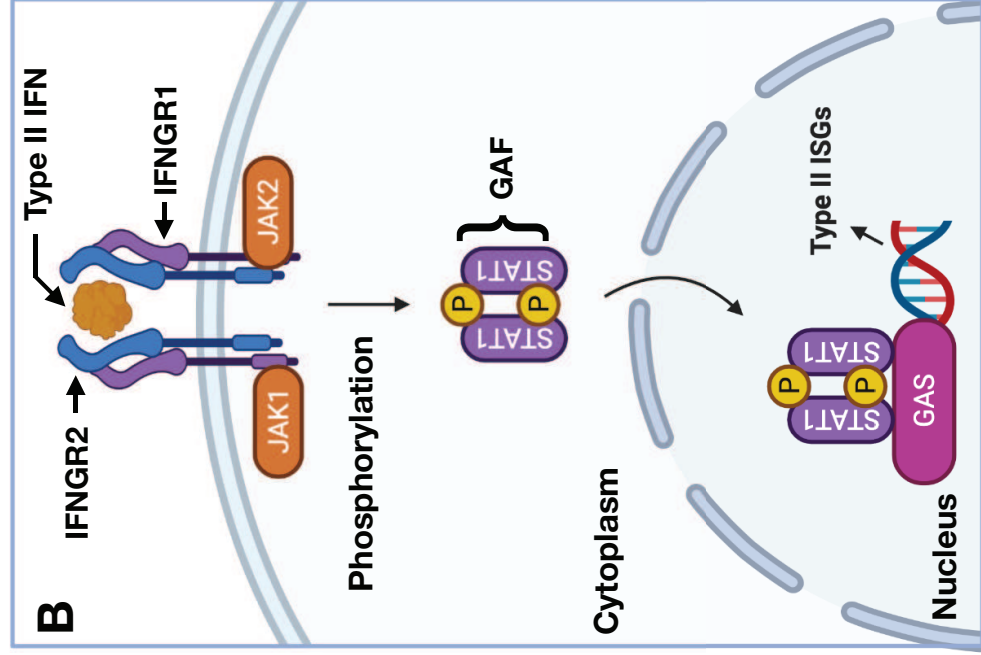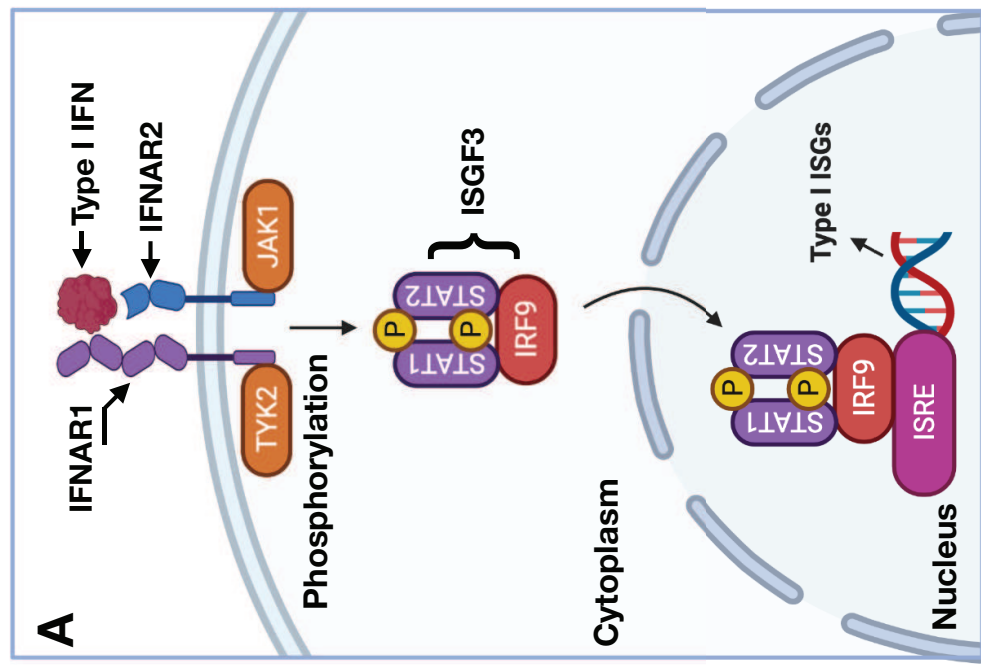

Figure 2

[Click here to access/download;Figure;Figure\\_2.eps](#)

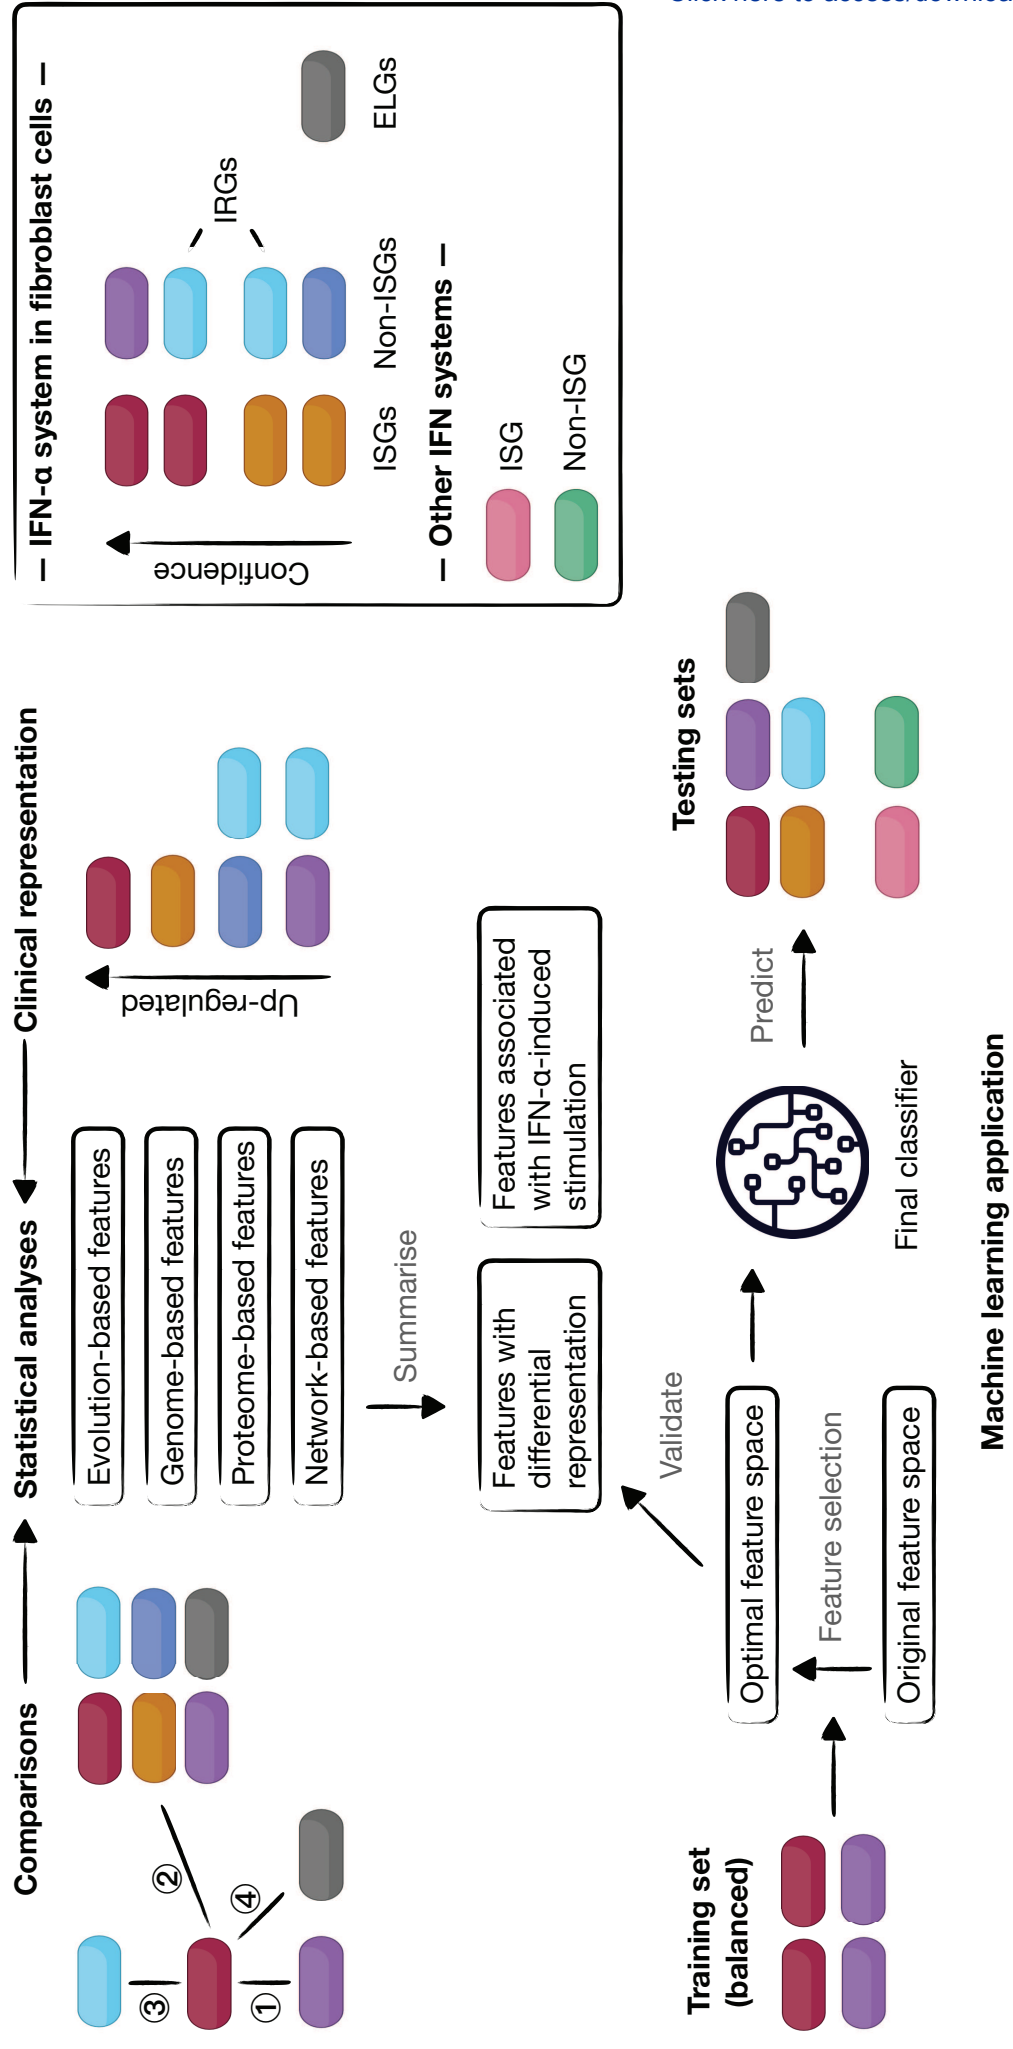

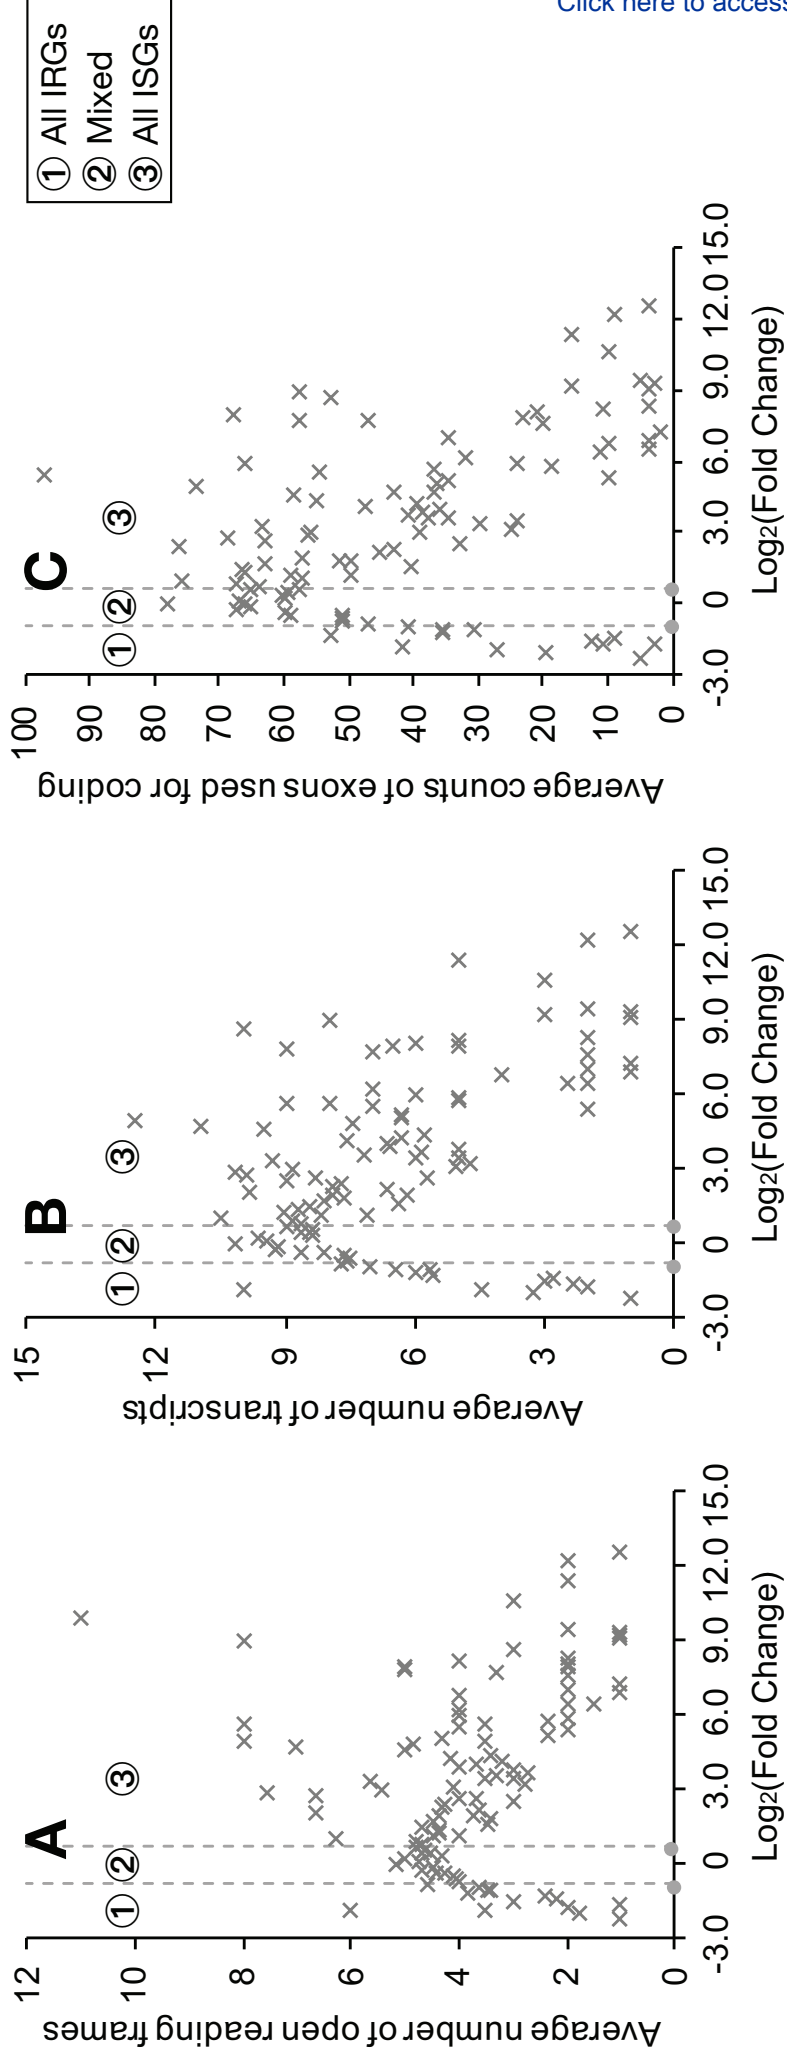

Figure 4

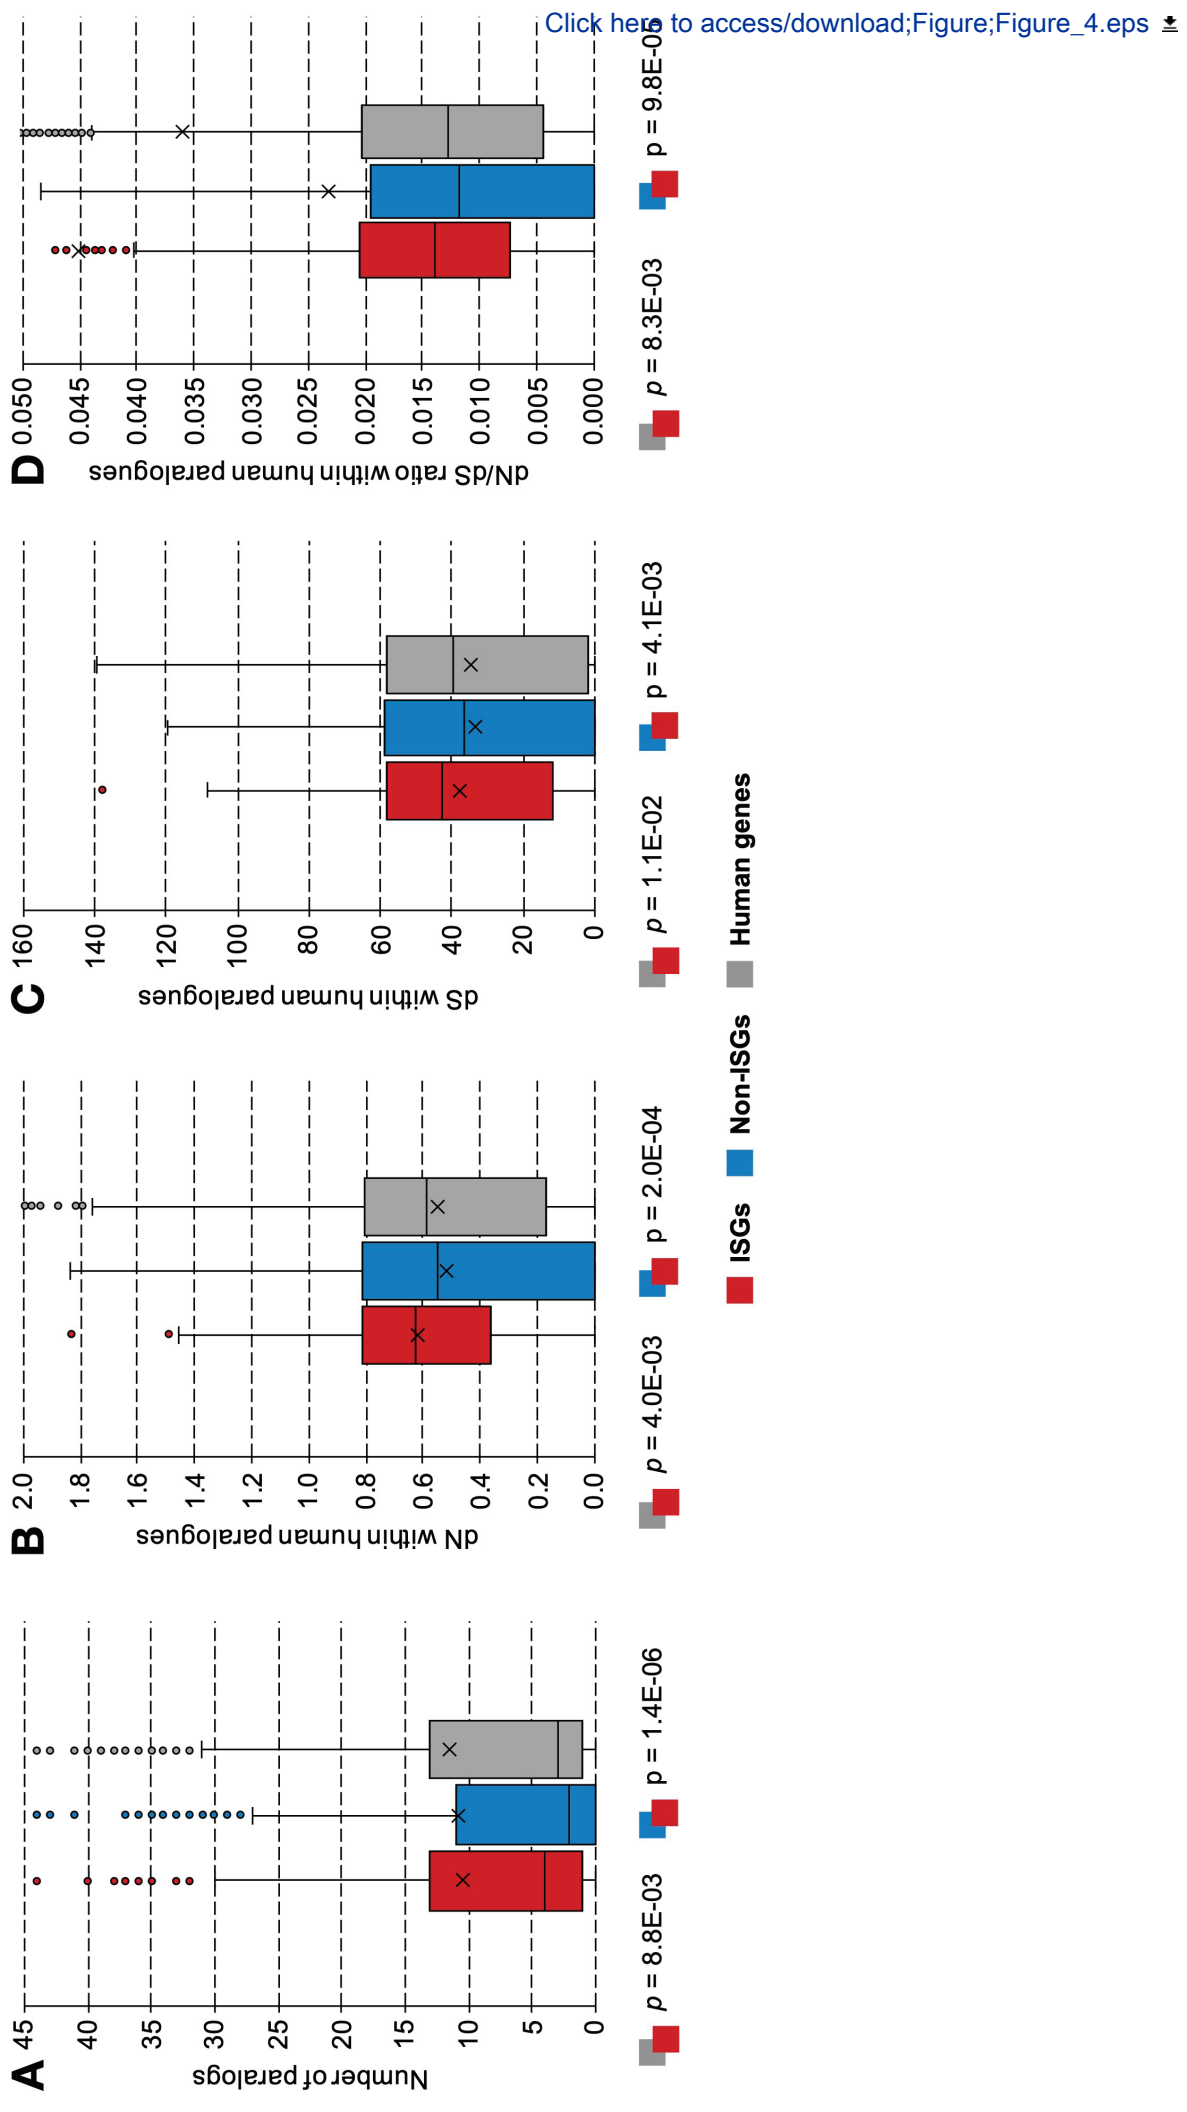

Figure 5

[Click here to access/download;Figure;Figure\\_5.eps](#)

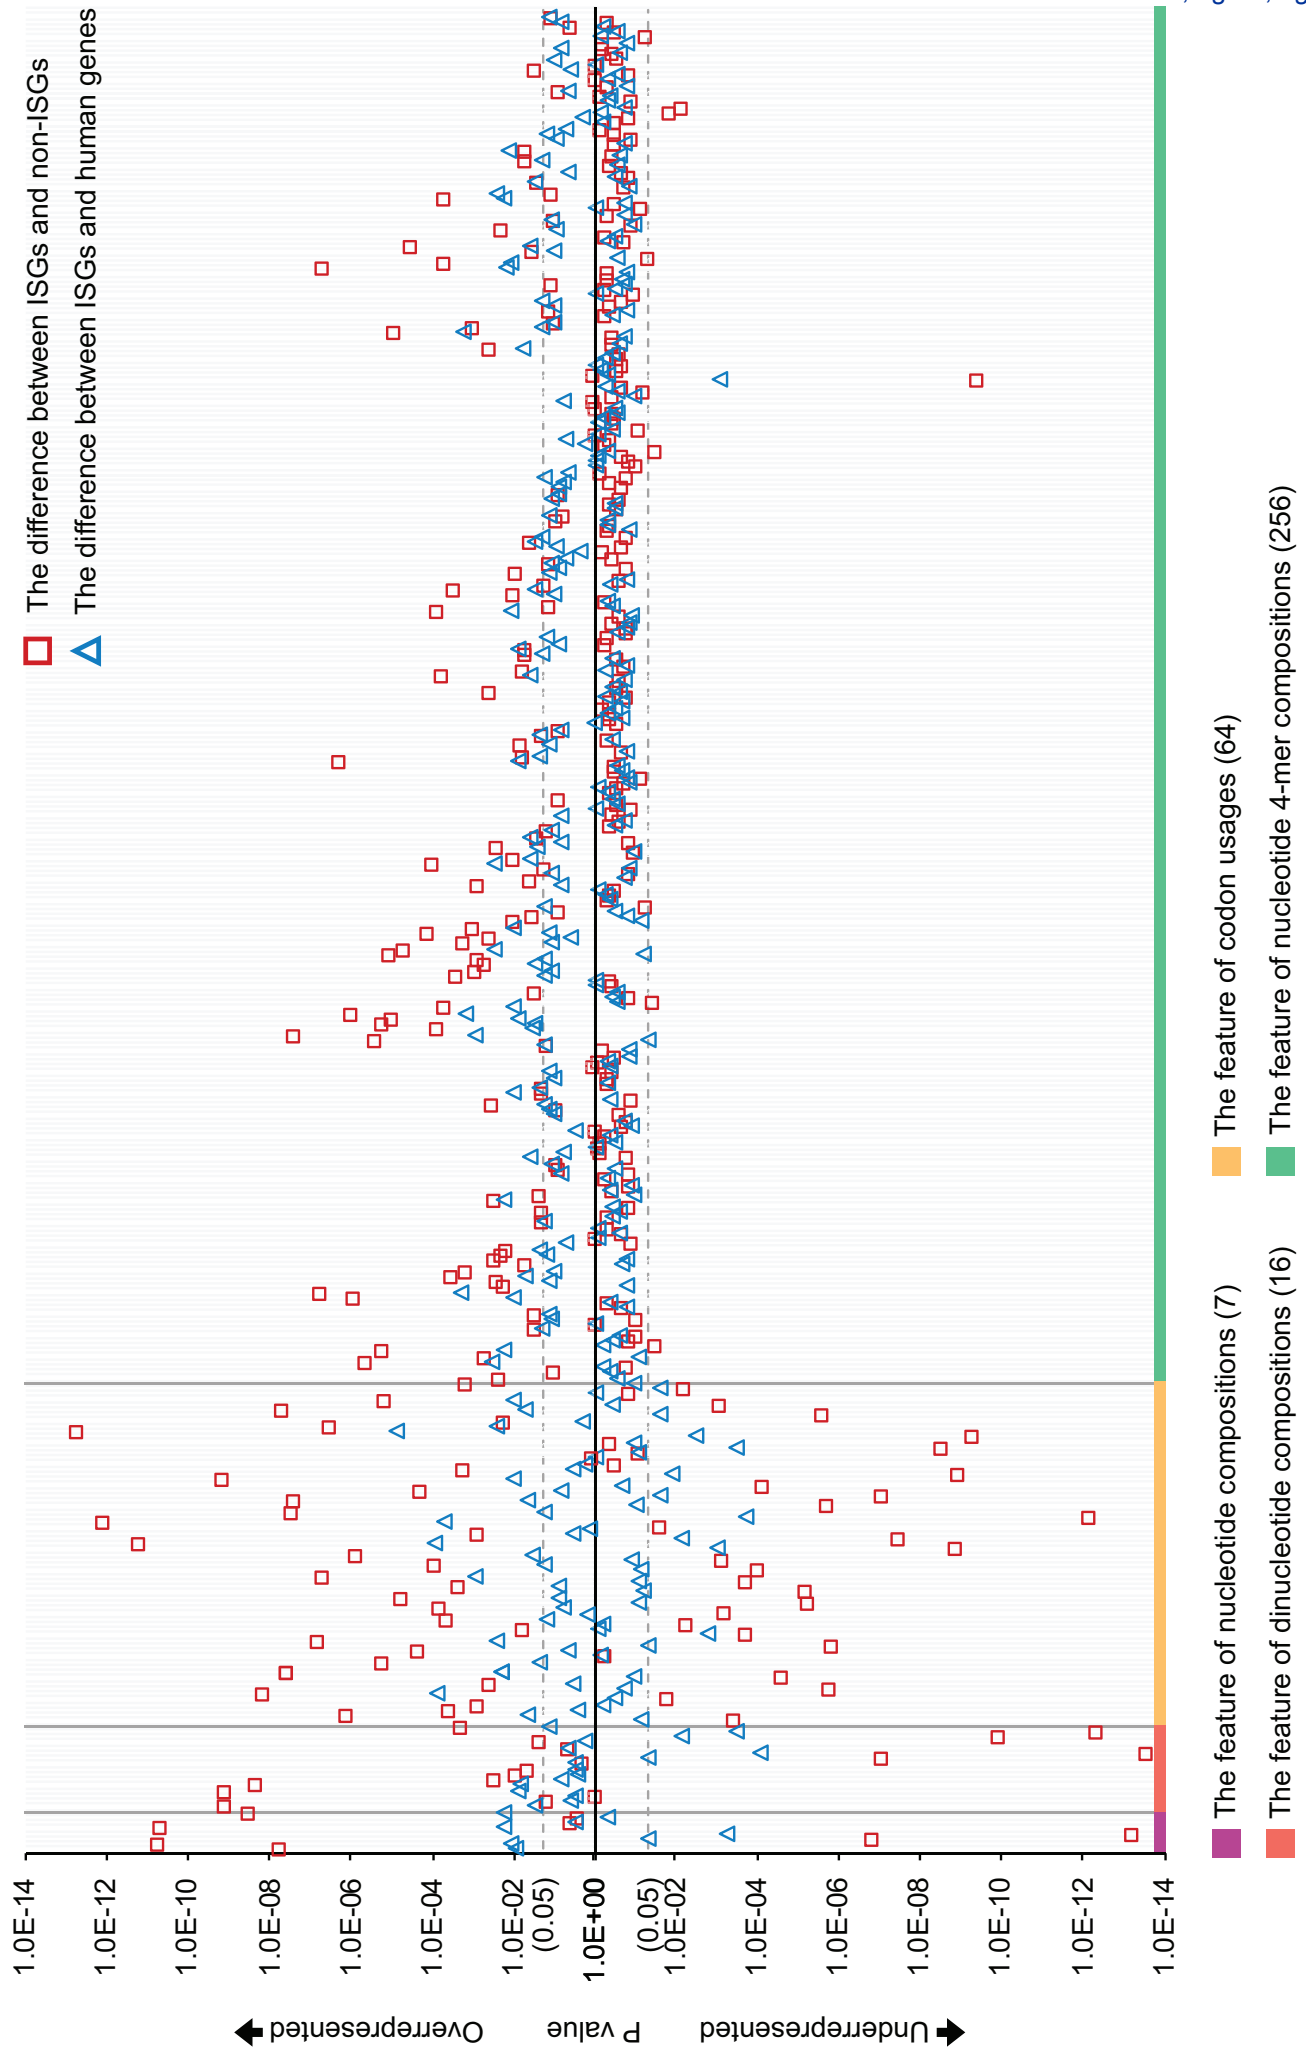

Figure 6

[Click here to access/download;Figure;Figure\\_6.eps](#)

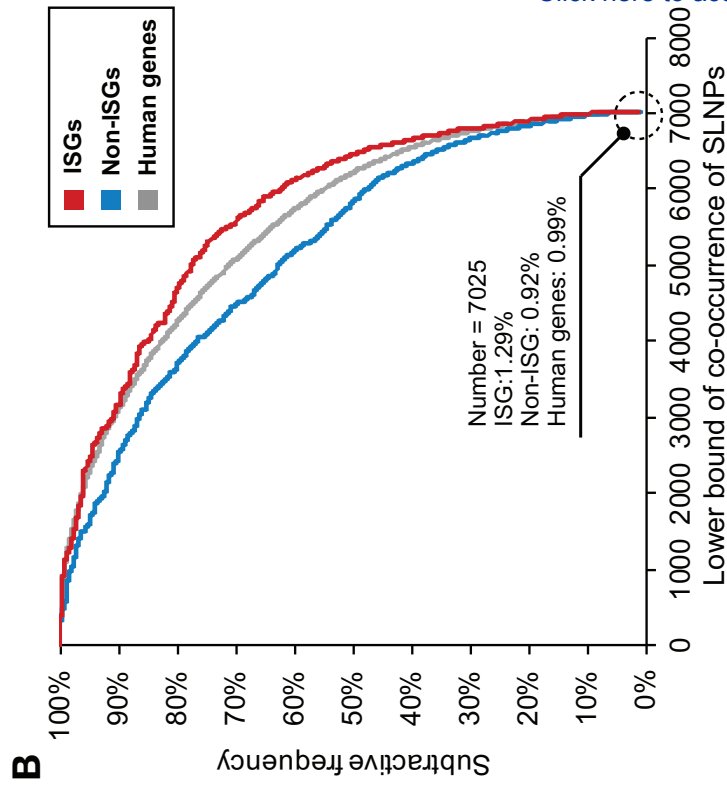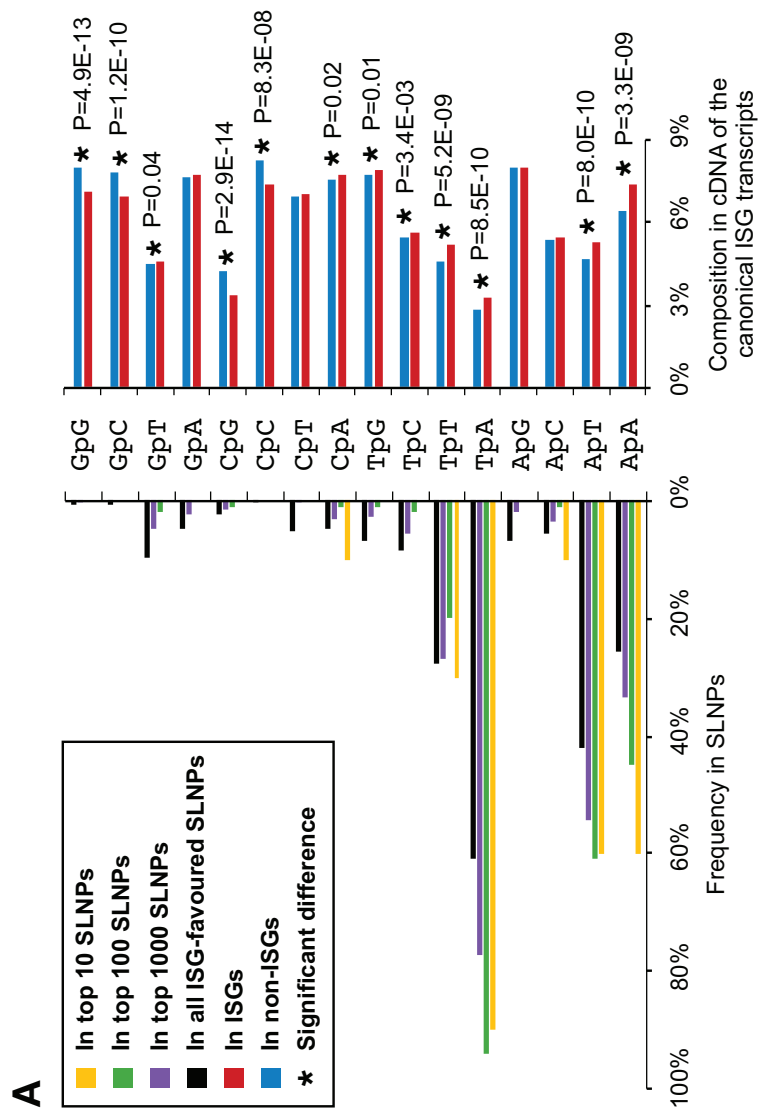

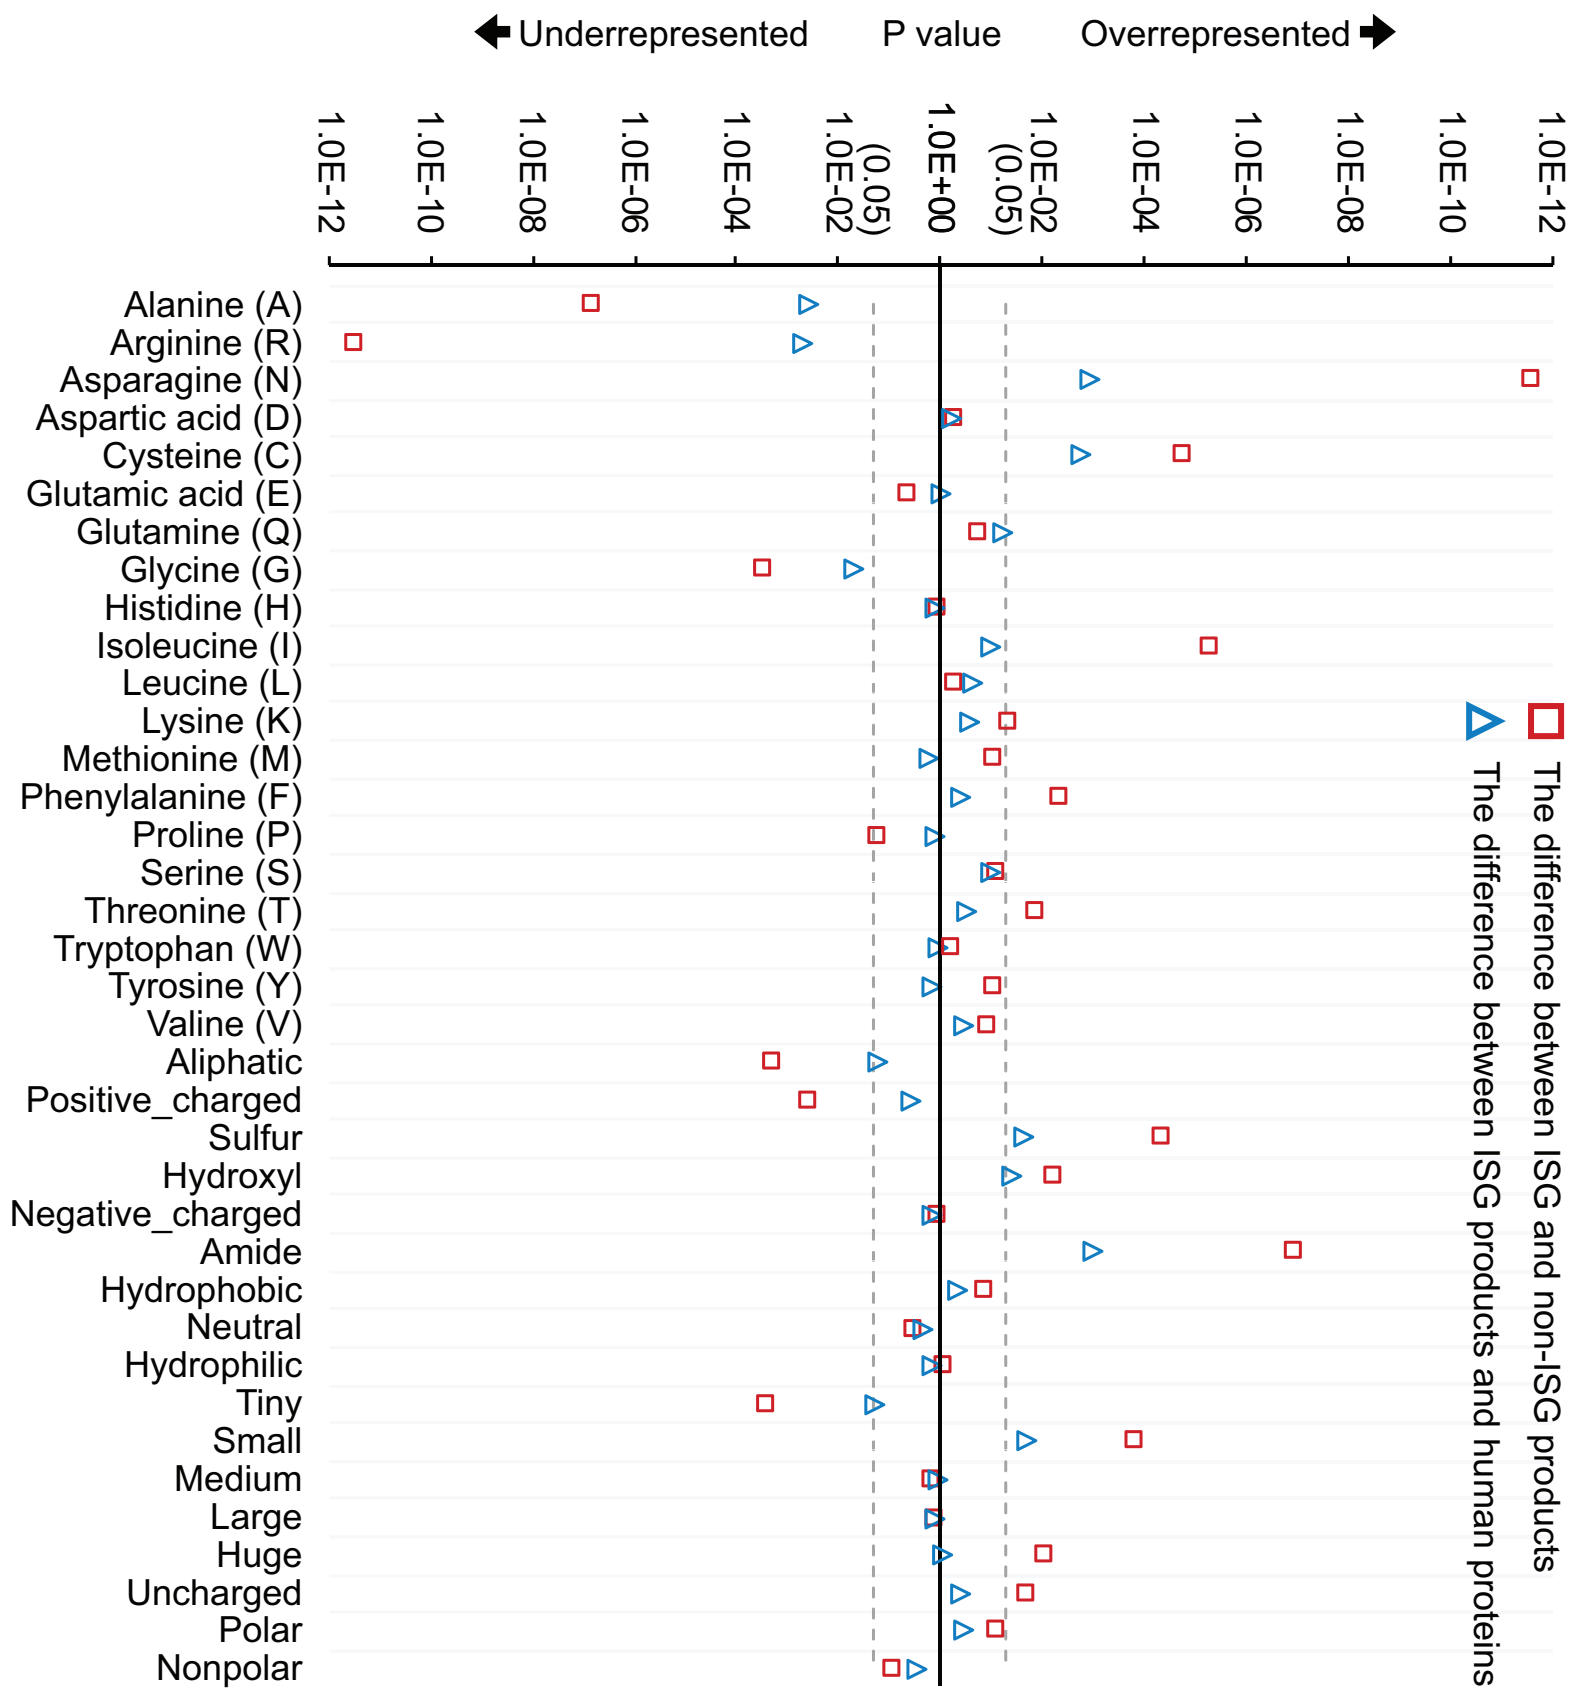

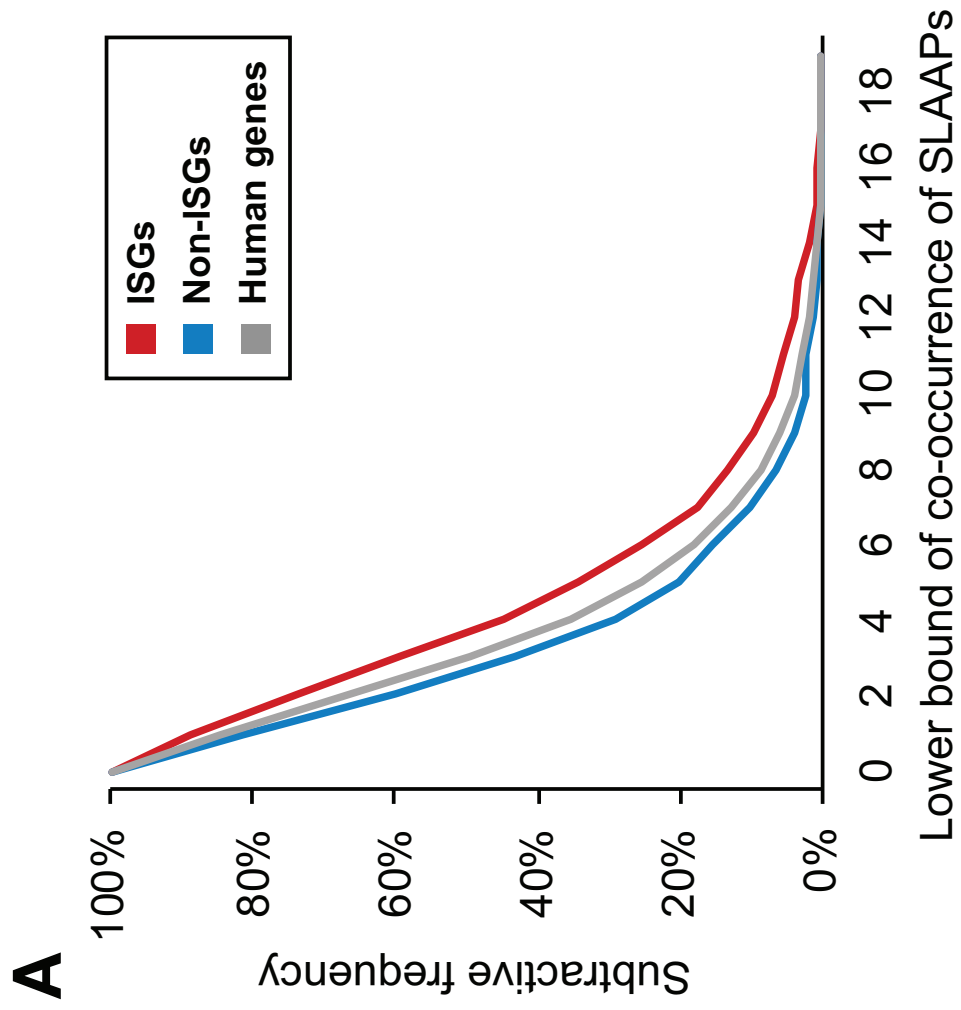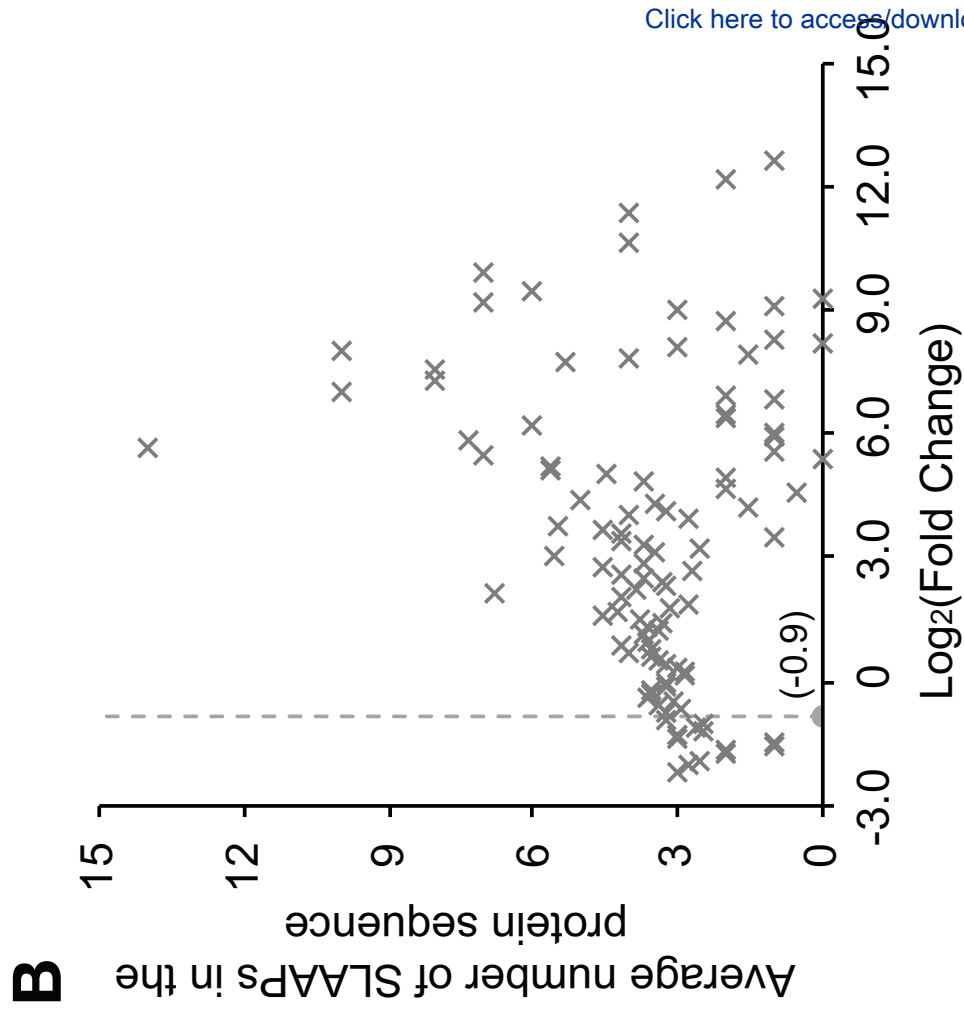



Figure 9

[Click here to access/download;Figure;Figure\\_9.eps](#)

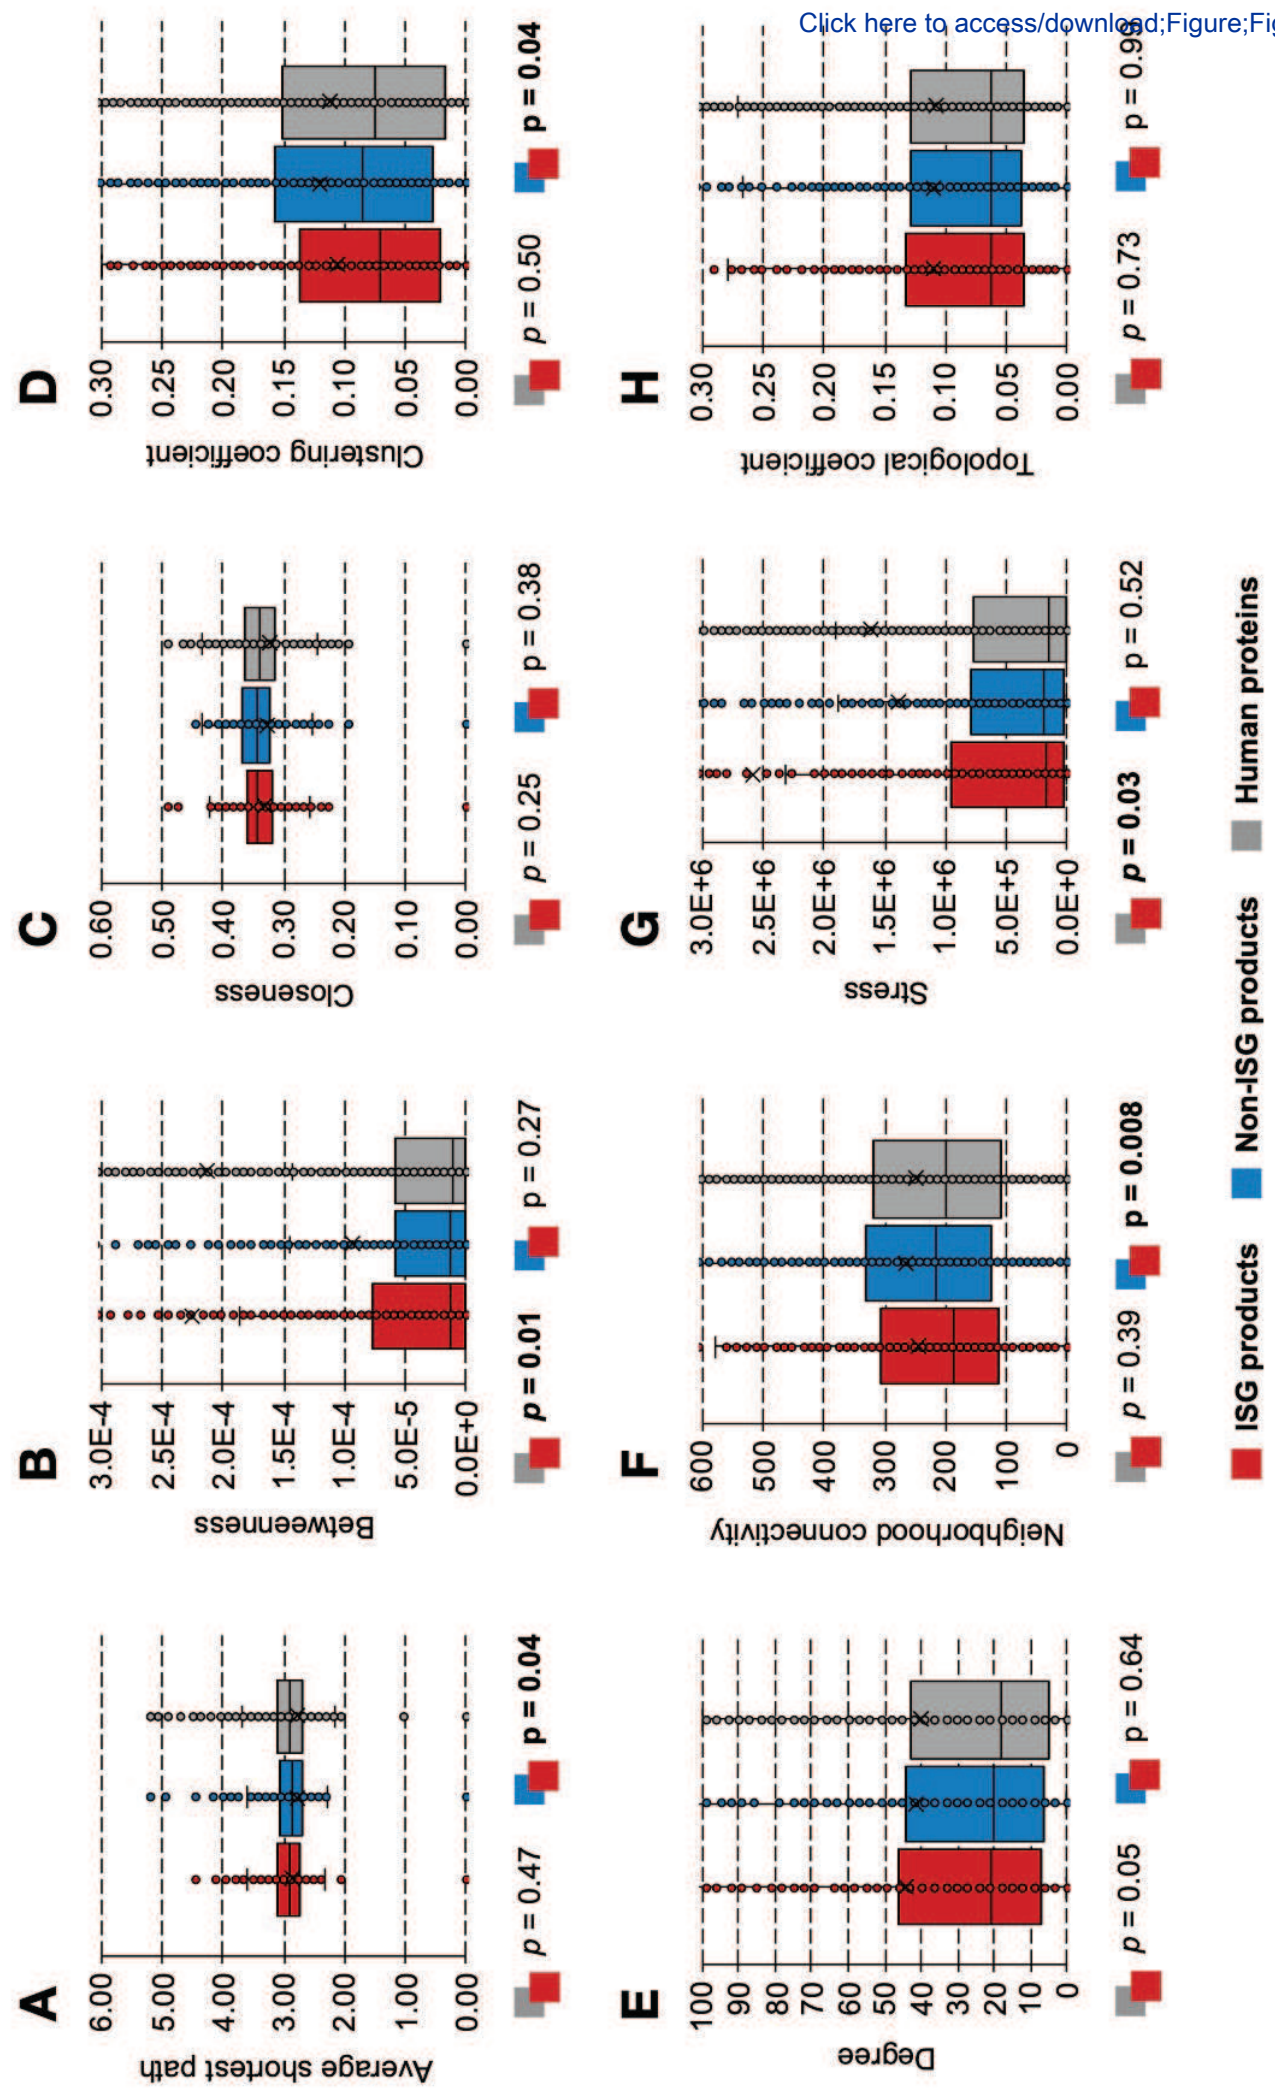

Figure 10

[Click here to access/download;Figure;Figure\\_10.eps](#)

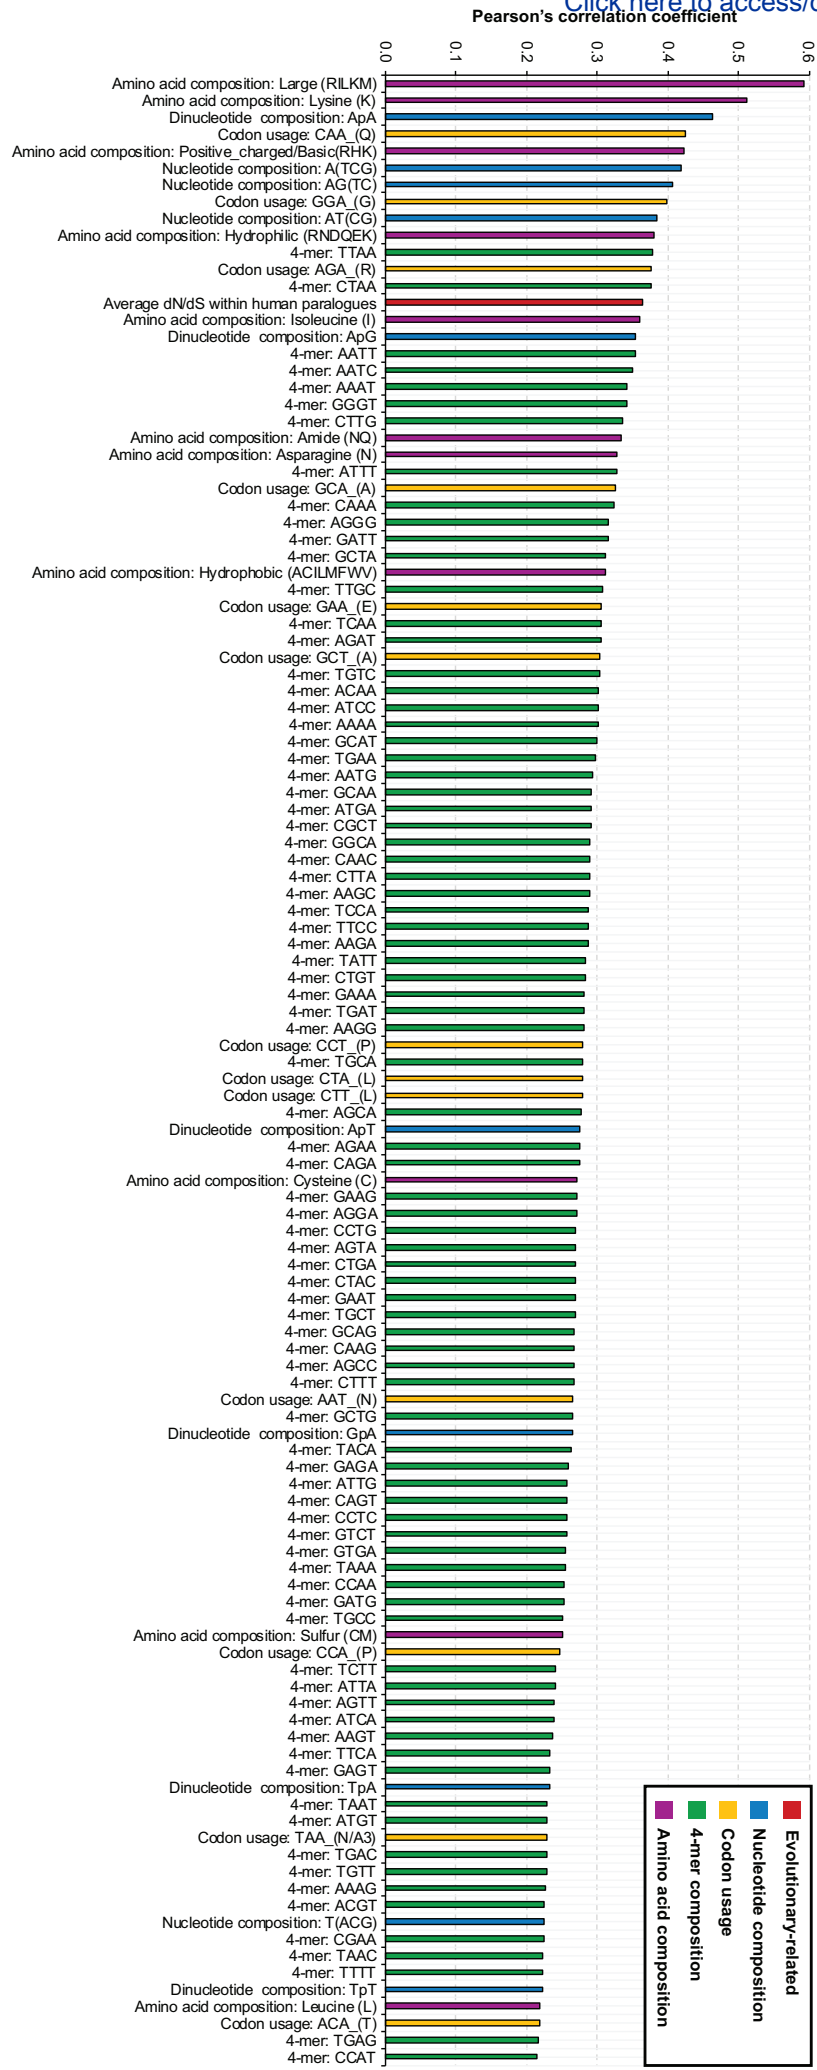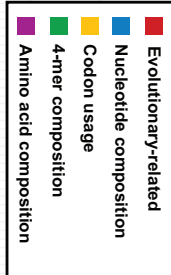

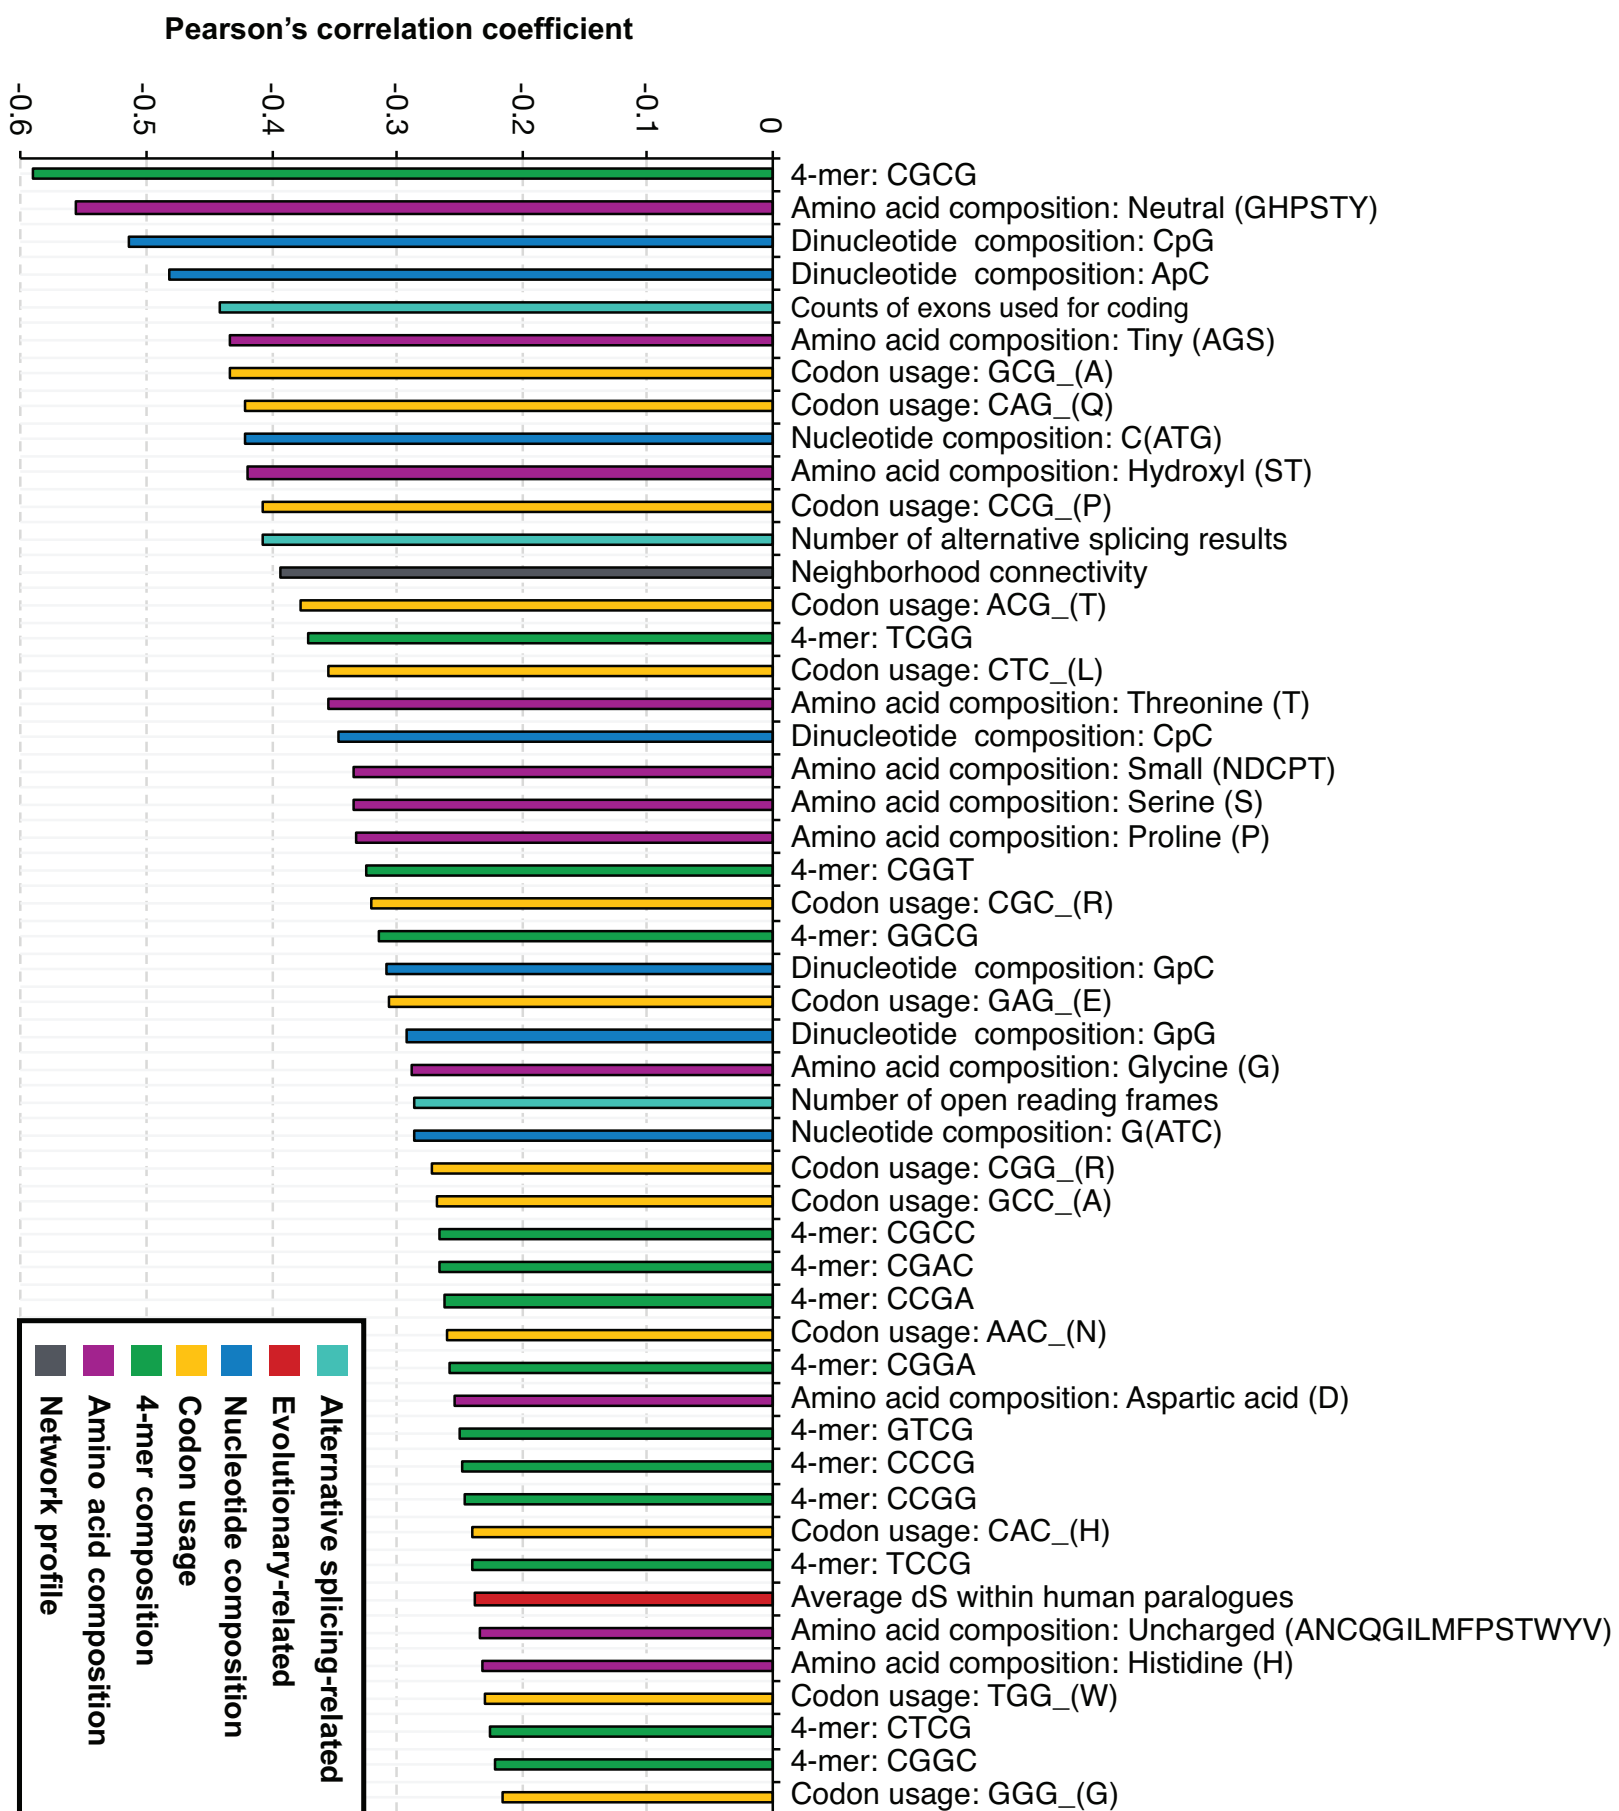

Figure 12

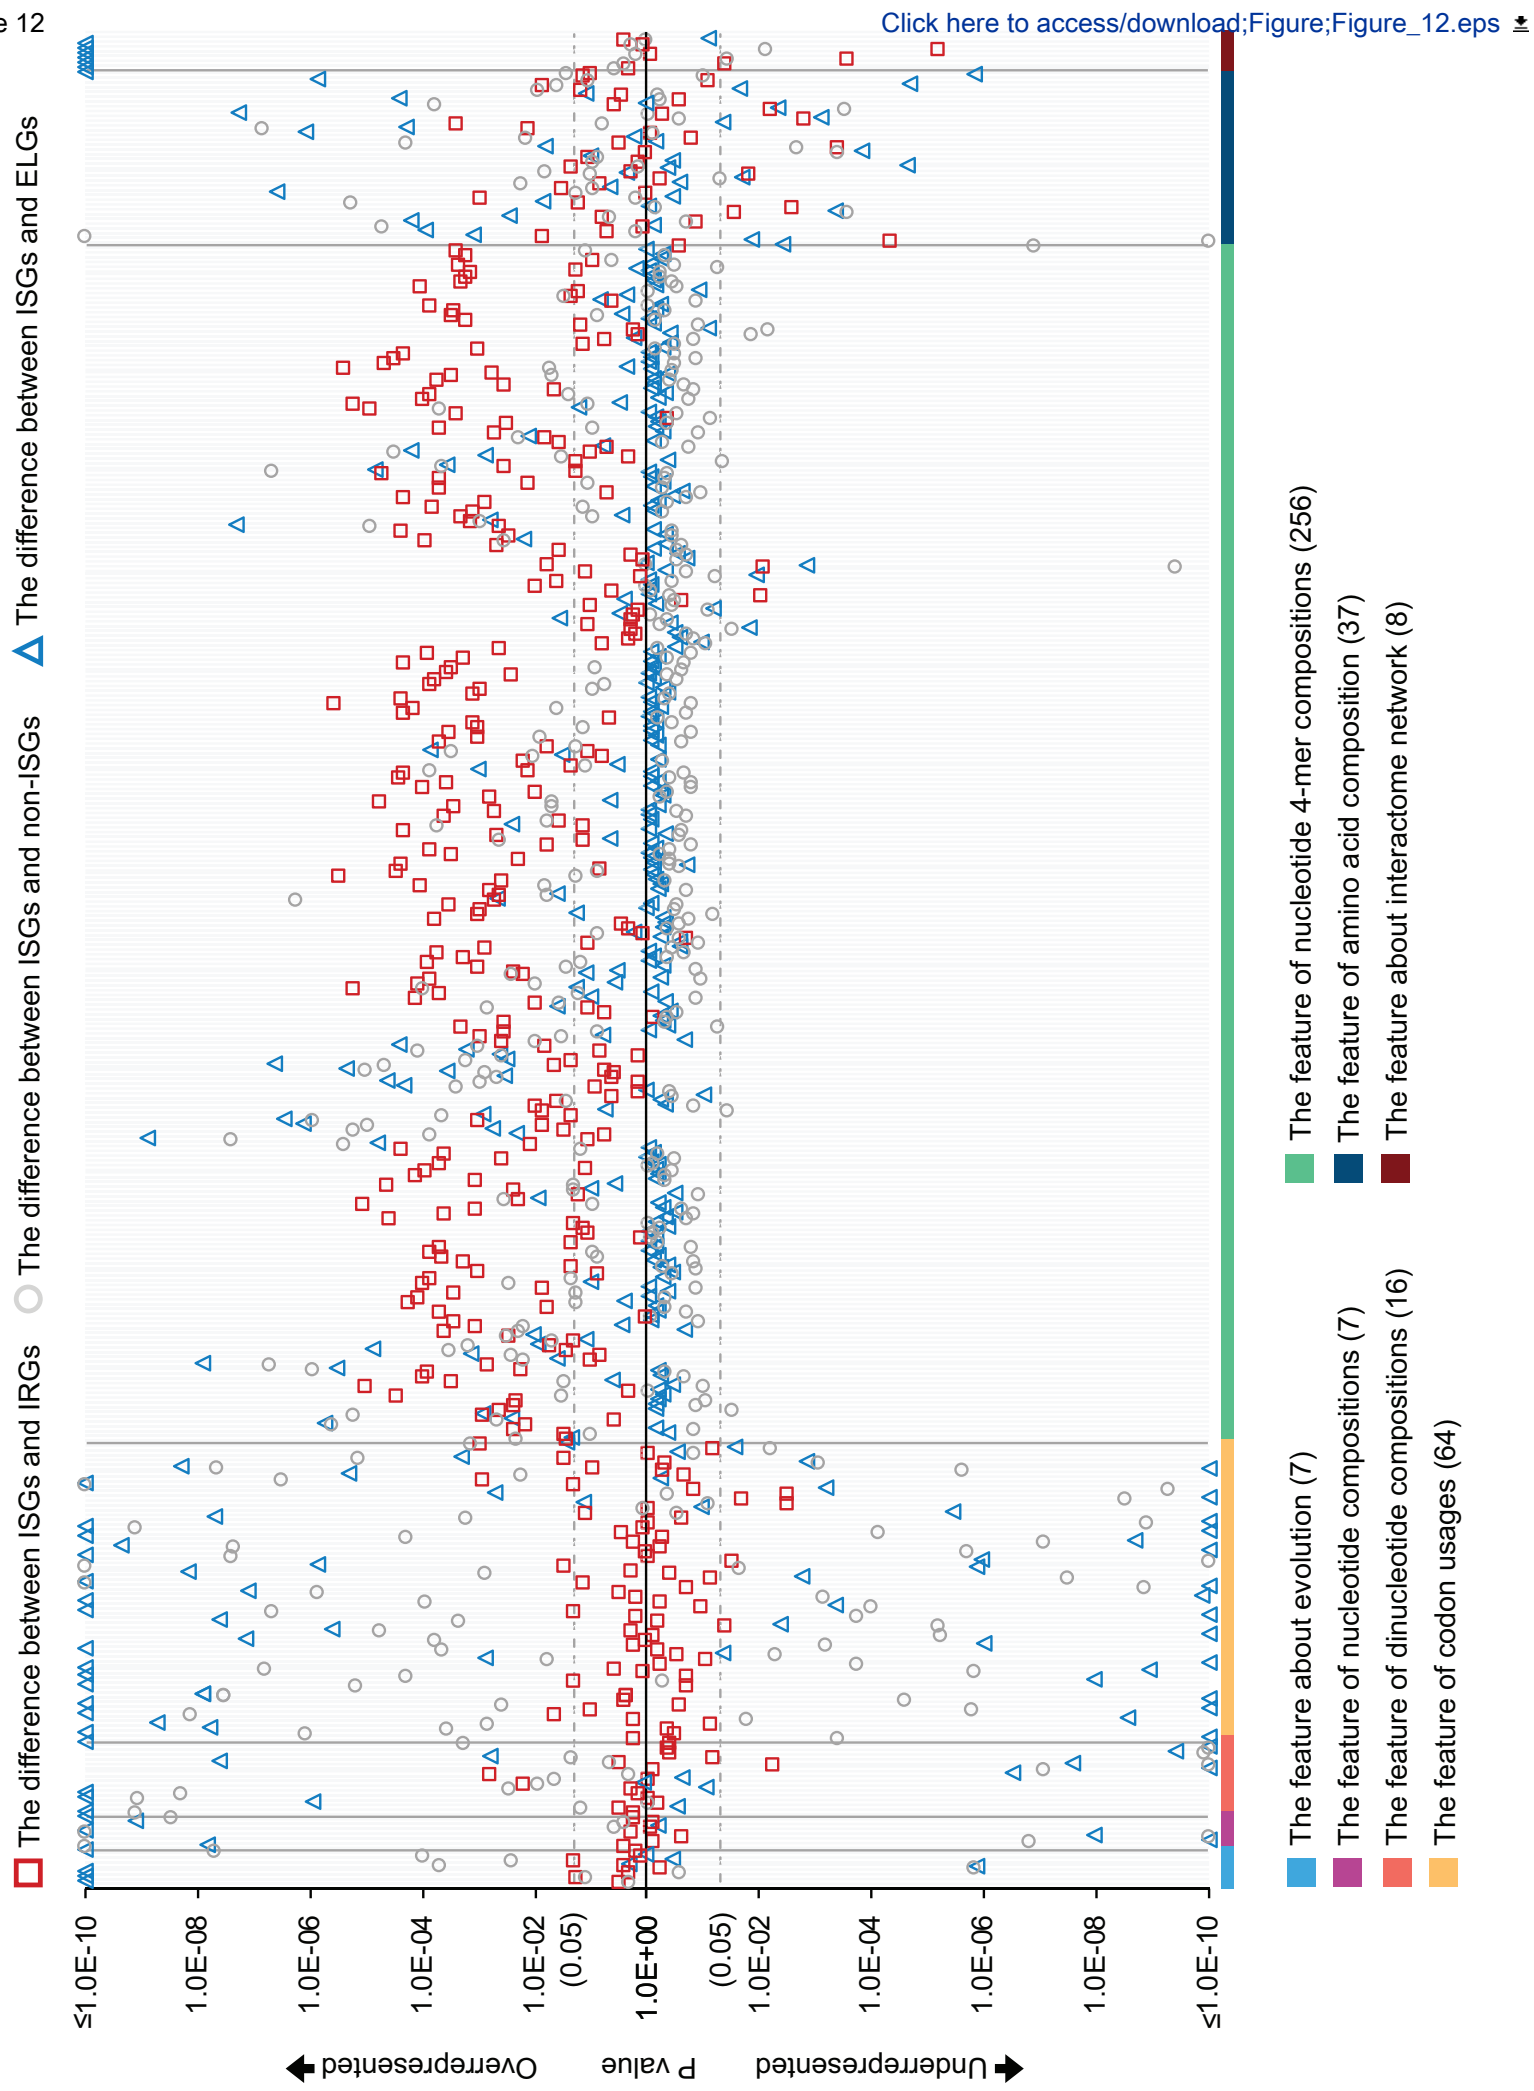

Figure 13

[Click here to access/download;Figure;Figure\\_13.eps](#)

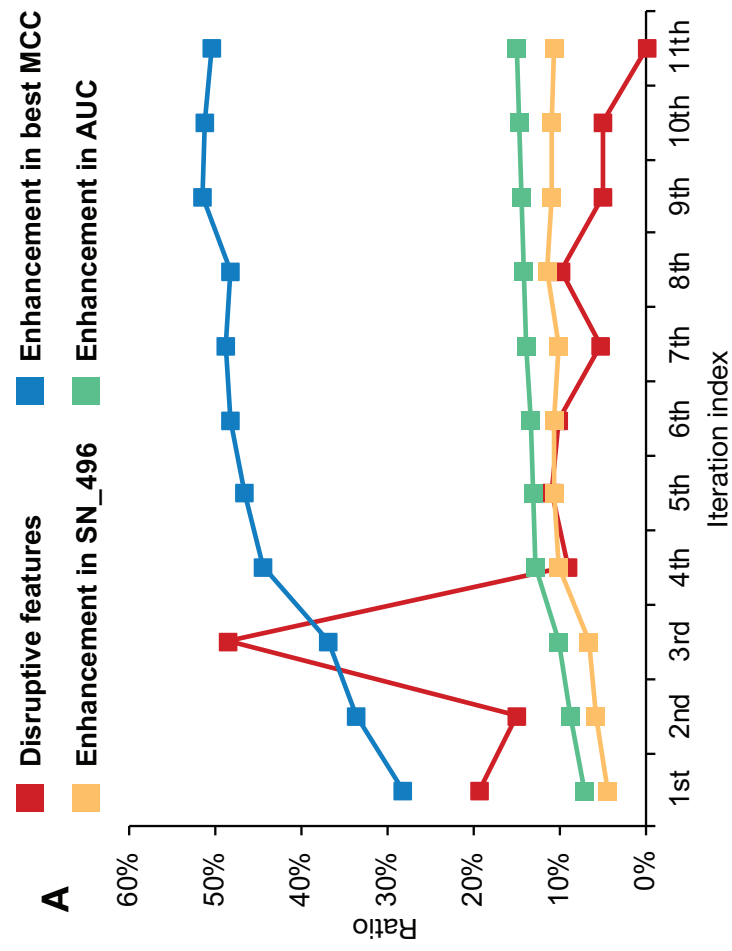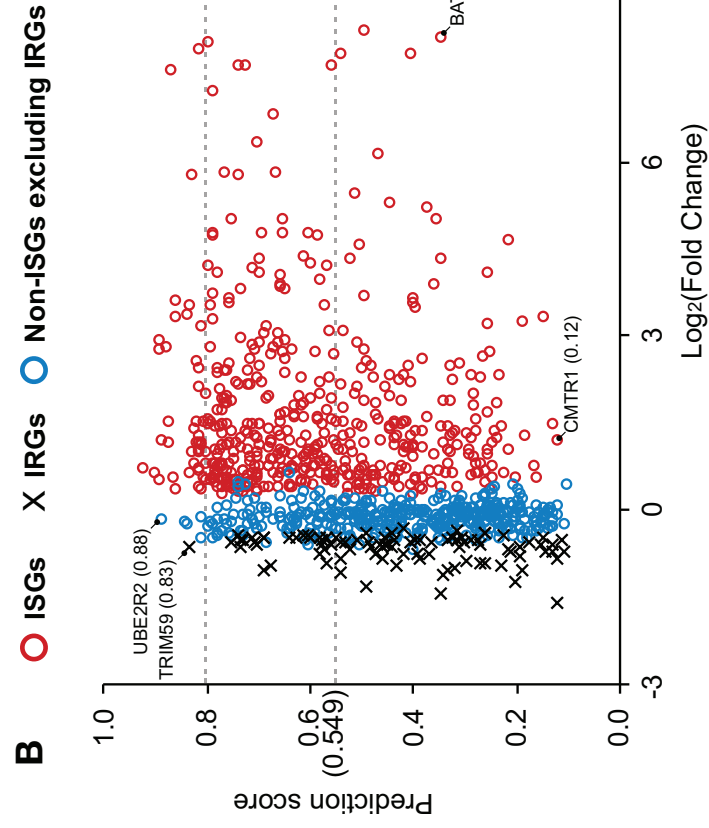

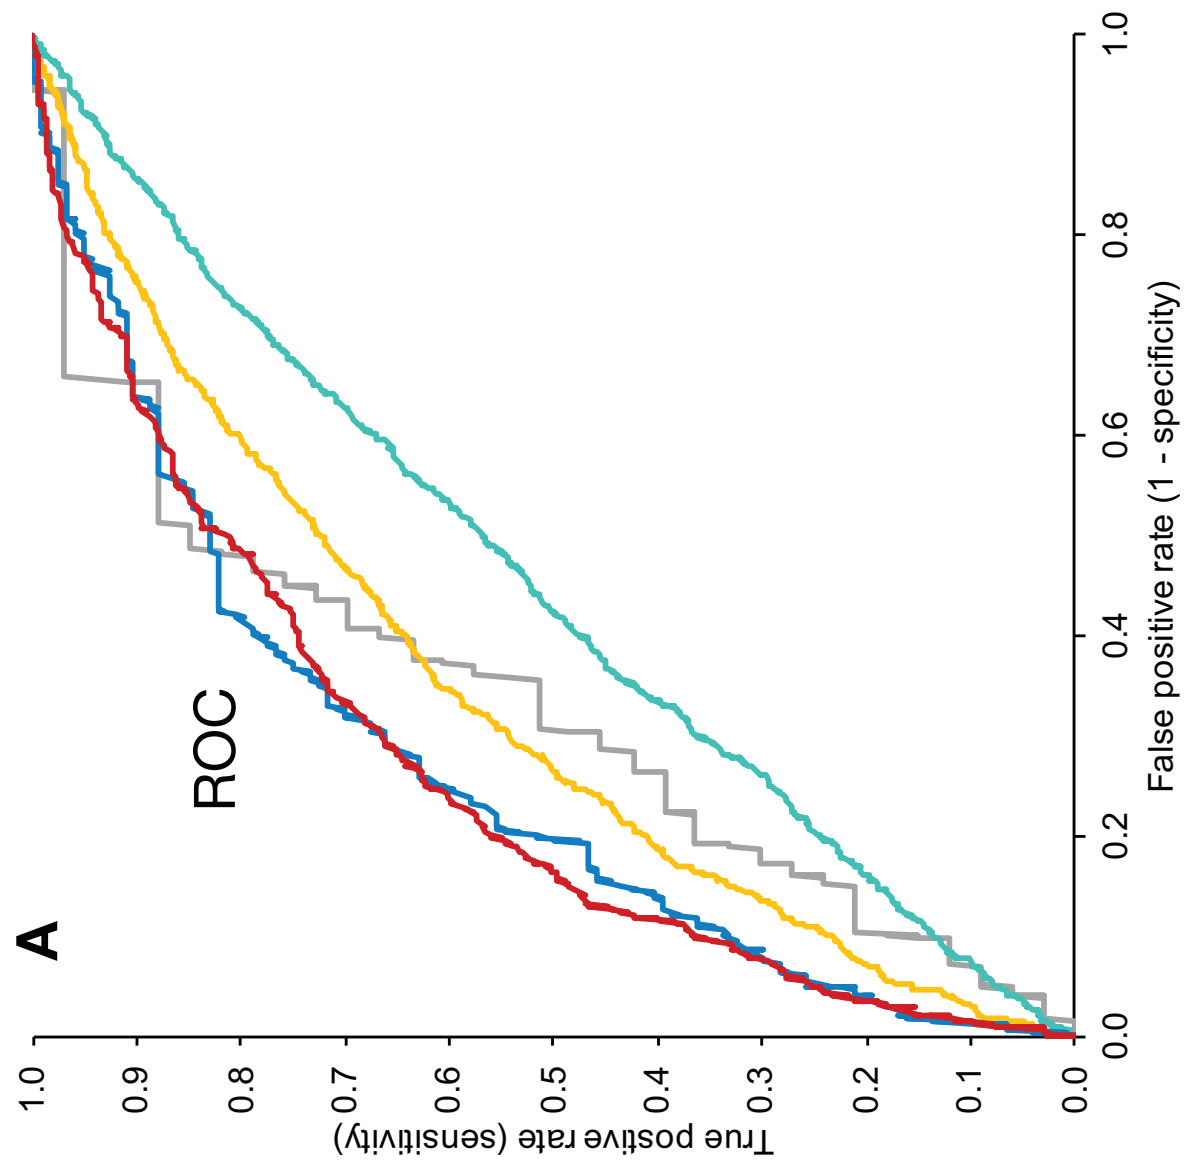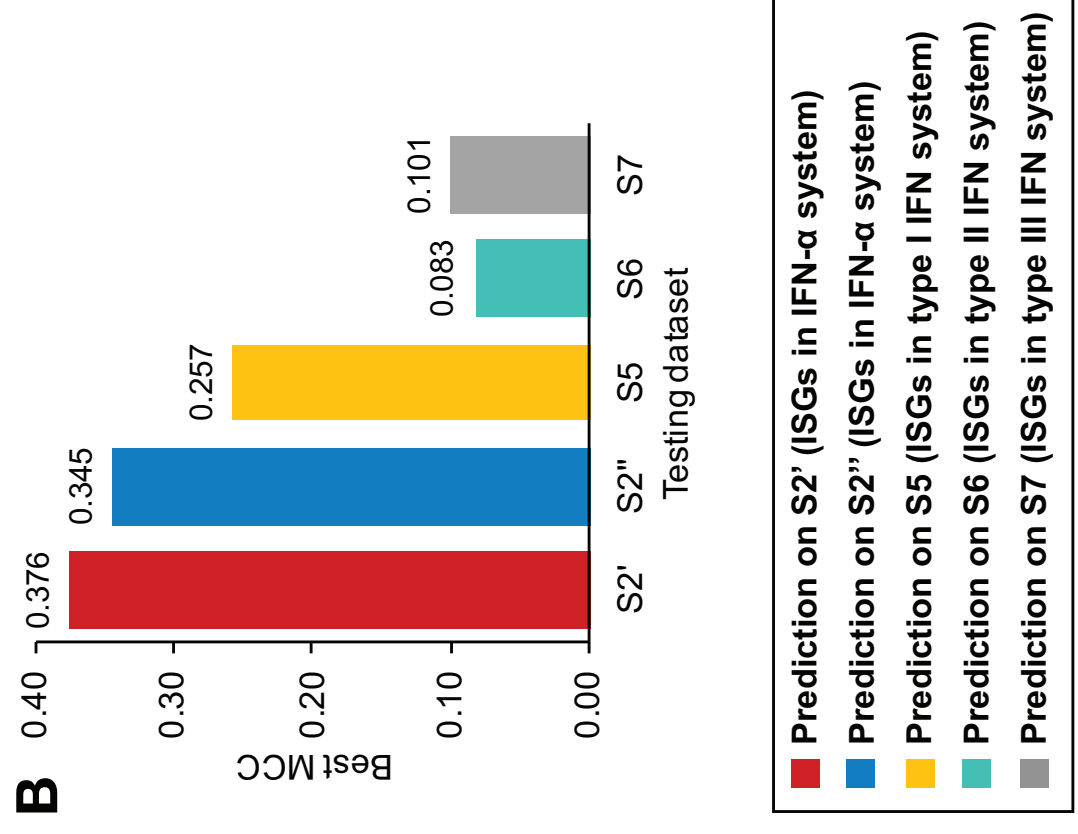



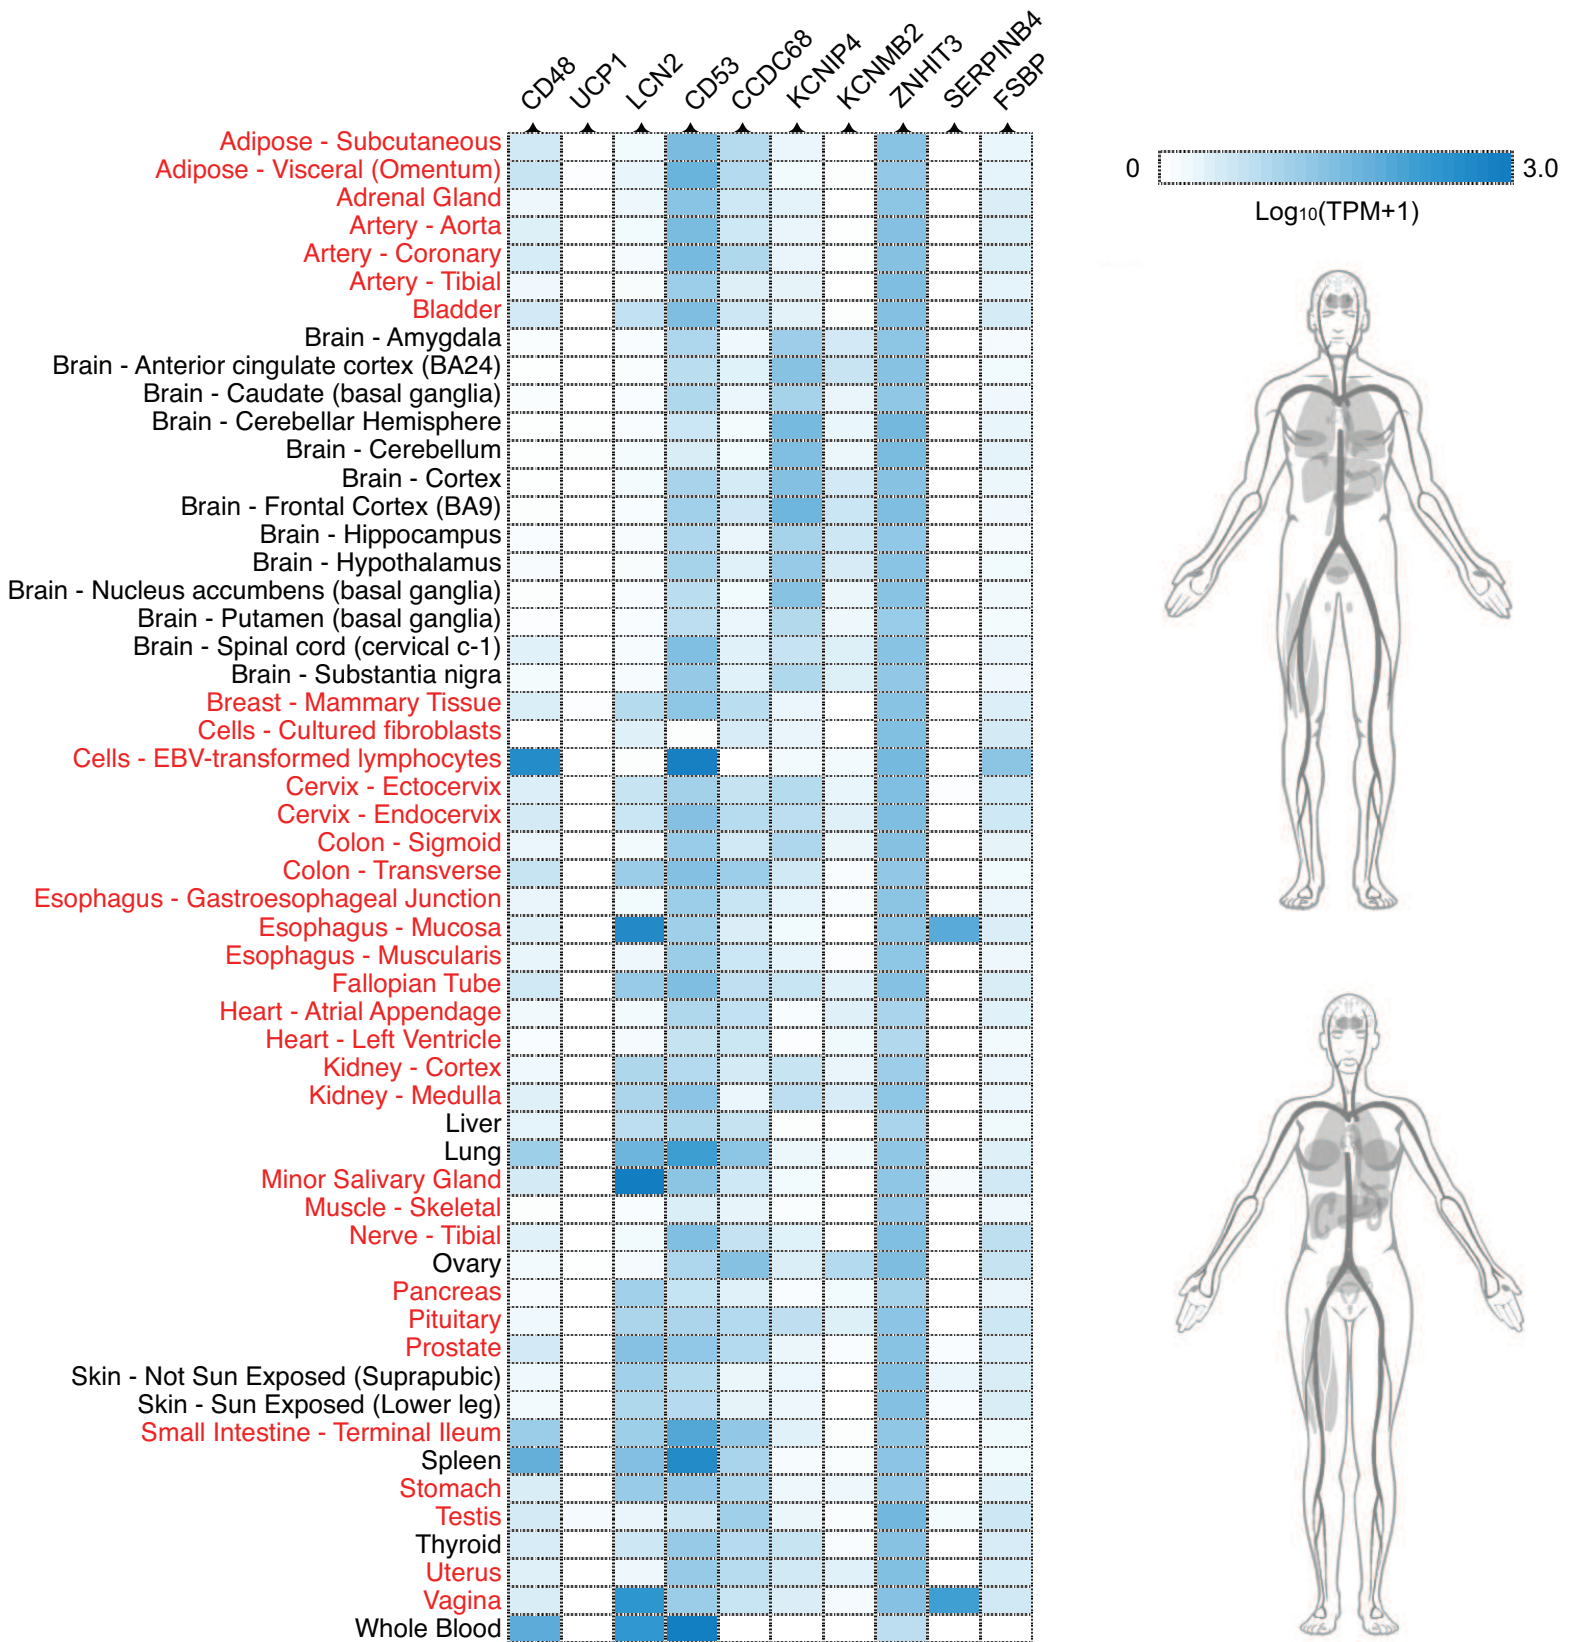

**BEGIN**

**Initialisation:** Balanced dataset  $S_0 = \{(1, v_1^0), \dots, (1, v_n^0), (0, v_{n+1}^0) \dots (0, v_{2n}^0)\}$ , dimension of the feature vector  $D_0$ , machine learning algorithm  $A$ , number of disruptive feature  $d_0 = D_0$ , and iteration round  $i = 0$ .

**While  $d_0 > 0$  ( $i^{th}$  iteration):**

- 1) Use five-fold cross validation on dataset  $S_i$ , prediction  $P_i = A(S_i)$ ;
- 2) Evaluate the  $P_i$  with the criterion of AUC;
- 3) Remove one feature from feature vector  $v^i$  and generate a temporary dataset  $T_i$ ;
- 4) Use five-fold cross validation on dataset  $T_i$ , prediction  $P'_i = A(T_i)$ ;
- 5) Evaluate the  $P'_i$  with the criterion of AUC;
- 6) Repeat 4) and 5) for the traversal of  $D_i$  features;
- 7) Traverse  $v^i$  and remove  $m$  features helpful to improve AUC of  $P'_i$ ,  $d_i = m$ ;
- 8) Update dataset  $S_{i+1} = \{(1, v_1^{i+1}), \dots, (1, v_n^{i+1}), (0, v_{n+1}^{i+1}) \dots (0, v_{2n}^{i+1})\}$ ,  $D_{i+1} = D_i - m$ .

**End**

**Output:** dataset  $S_{i-1}$  encoded by  $D_{i-1}$  features.

**END**





Click here to access/download  
**Supplementary Material**  
Supplementary\_Data\_S1.csv



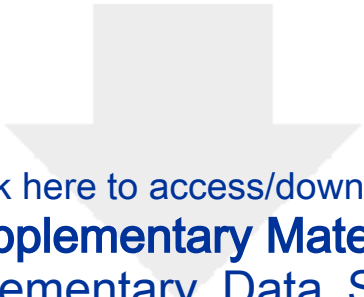

Click here to access/download  
**Supplementary Material**  
Supplementary\_Data\_S2.csv



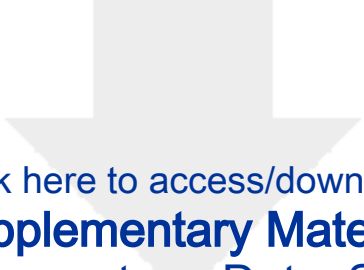

Click here to access/download  
**Supplementary Material**  
Supplementary\_Data\_S3.csv





Click here to access/download  
**Supplementary Material**  
Supplementary\_Data\_S4.csv



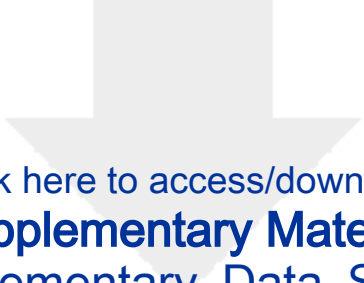

Click here to access/download  
**Supplementary Material**  
Supplementary\_Data\_S5.csv



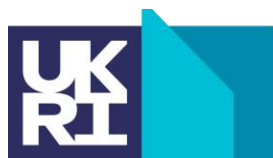

Medical  
Research  
Council

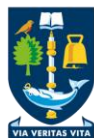

University  
of Glasgow

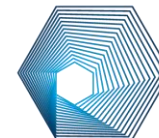

CVR  
Centre for  
Virus Research

Editors

GigaScience

7<sup>th</sup> September 2022

Dear Editors

On behalf of my co-authors please consider the resubmission of our research article entitled ‘Defining the characteristics of interferon-alpha-stimulated human genes: insight from expression data and machine learning’ for consideration in your journal. We present systematic data analyses on large-scale features to characterise the association between the response of human genes to interferons- $\alpha$  (IFN- $\alpha$ ) and their inherent properties. Our results show that the up-regulated interferon- $\alpha$  stimulated genes (ISGs) differentially represent many features that make them distinguishable from those not significantly up-regulated (non-ISGs) in the presence of IFN- $\alpha$ . We find that the IFN- $\alpha$  repressed human genes (IRGs) have some shared properties with the ISGs. We apply machine learning ideas with an original feature selection strategy to prove the predictability of the ISGs. Our prediction method is implemented as a web server at <http://isgpre.cvr.gla.ac.uk/> and Docker image at <https://hub.docker.com/repository/docker/hchai01/isgpre>. The source code, prediction model, and all feature profiles are released at <https://github.com/HChai01/ISGPRE> for reproducible use. We believe our article will be of interest to the international research community, and thus will be of interest to your readership. We confirm that this manuscript has not been published elsewhere, is not under consideration by any other journal, and that all authors have read and approved the submission of the manuscript.

Yours Sincerely,



Joseph Hughes
